# Supplementary material for: Characterization of Neurodevelopmental Abnormalities in iPSC-Derived Striatal Cultures from Patients with Huntington’s Disease
Source: PubMed Central journal article supplement — J Huntingtons Dis. 2019 Aug 27;8(3):257–69. doi: 10.3233/JHD-180333 (PMC6839479; doi:10.3233/jhd-180333), 2019-08-27
Supplement: jhd-8-jhd180333-s002.pdf [file jhd-8-jhd180333-s002.pdf]

| Nestin                                                       |                      |                 |                        |              |
|--------------------------------------------------------------|----------------------|-----------------|------------------------|--------------|
| <b>Two-way ANOVA</b>                                         |                      |                 |                        |              |
| Source of Variation                                          | % of total variation | P value         | P value summary        | Significant? |
| Interaction                                                  | 23.91                | < 0.0001        | ****                   | Yes          |
| Row Factor                                                   | 13.64                | < 0.0001        | ****                   | Yes          |
| Column Factor                                                | 40.81                | < 0.0001        | ****                   | Yes          |
| <b>One-way ANOVA (between cell lines, within time point)</b> |                      |                 |                        |              |
| Bonferroni's Multiple Comparison Test                        | Mean Diff.           | t               | Significant? P < 0.05? | Summary      |
| Day 0:                                                       |                      |                 |                        |              |
| CTR 18 vs. CTR 21                                            | -2                   | -49.93 to 45.93 | No                     | ns           |
| CTR 18 vs. CTR 28                                            | 29.33                | -18.60 to 77.27 | No                     | ns           |
| CTR 18 vs. CTR 33                                            | 29                   | -18.93 to 76.93 | No                     | ns           |
| CTR 18 vs. HD 60                                             | 33.33                | -14.60 to 81.27 | No                     | ns           |
| CTR 18 vs. HD 71                                             | 30                   | -17.93 to 77.93 | No                     | ns           |
| CTR 18 vs. HD 77                                             | -11.67               | -59.60 to 36.27 | No                     | ns           |
| CTR 18 vs. HD 109                                            | 34                   | -13.93 to 81.93 | No                     | ns           |
| CTR 18 vs. HD 180                                            | -13.33               | -61.27 to 34.60 | No                     | ns           |
| CTR 21 vs. CTR 28                                            | 31.33                | -16.60 to 79.27 | No                     | ns           |
| CTR 21 vs. CTR 33                                            | 31                   | -16.93 to 78.93 | No                     | ns           |
| CTR 21 vs. HD 60                                             | 35.33                | -12.60 to 83.27 | No                     | ns           |
| CTR 21 vs. HD 71                                             | 32                   | -15.93 to 79.93 | No                     | ns           |
| CTR 21 vs. HD 77                                             | -9.667               | -57.60 to 38.27 | No                     | ns           |
| CTR 21 vs. HD 109                                            | 36                   | -11.93 to 83.93 | No                     | ns           |
| CTR 21 vs. HD 180                                            | -11.33               | -59.27 to 36.60 | No                     | ns           |
| CTR 28 vs. CTR 33                                            | -0.3333              | -48.27 to 47.60 | No                     | ns           |
| CTR 28 vs. HD 60                                             | 4                    | -43.93 to 51.93 | No                     | ns           |
| CTR 28 vs. HD 71                                             | 0.6667               | -47.27 to 48.60 | No                     | ns           |
| CTR 28 vs. HD 77                                             | -41                  | -88.93 to 6.932 | No                     | ns           |
| CTR 28 vs. HD 109                                            | 4.667                | -43.27 to 52.60 | No                     | ns           |
| CTR 28 vs. HD 180                                            | -42.67               | -90.60 to 5.265 | No                     | ns           |
| CTR 33 vs. HD 60                                             | 4.333                | -43.60 to 52.27 | No                     | ns           |
| CTR 33 vs. HD 71                                             | 1                    | -46.93 to 48.93 | No                     | ns           |
| CTR 33 vs. HD 77                                             | -40.67               | -88.60 to 7.265 | No                     | ns           |
| CTR 33 vs. HD 109                                            | 5                    | -42.93 to 52.93 | No                     | ns           |
| CTR 33 vs. HD 180                                            | -42.33               | -90.27 to 5.599 | No                     | ns           |
| HD 60 vs. HD 71                                              | -3.333               | -51.27 to 44.60 | No                     | ns           |
| HD 60 vs. HD 77                                              | -45                  | -92.93 to 2.932 | No                     | ns           |
| HD 60 vs. HD 109                                             | 0.6667               | -47.27 to 48.60 | No                     | ns           |
| HD 60 vs. HD 180                                             | -46.67               | -94.60 to 1.265 | No                     | ns           |
| HD 71 vs. HD 77                                              | -41.67               | -89.60 to 6.265 | No                     | ns           |
| HD 71 vs. HD 109                                             | 4                    | -43.93 to 51.93 | No                     | ns           |

|                   |         |                  |     |     |
|-------------------|---------|------------------|-----|-----|
| HD 71 vs. HD 180  | -43.33  | -91.27 to 4.599  | No  | ns  |
| HD 77 vs. HD 109  | 45.67   | -2.265 to 93.60  | No  | ns  |
| HD 77 vs. HD 180  | -1.667  | -49.60 to 46.27  | No  | ns  |
| HD 109 vs. HD 180 | -47.33  | -95.27 to 0.5985 | No  | ns  |
| Day 7:            |         |                  |     |     |
| CTR 18 vs. CTR 21 | -28.67  | -67.74 to 10.40  | No  | ns  |
| CTR 18 vs. CTR 28 | 24.83   | -11.71 to 61.38  | No  | ns  |
| CTR 18 vs. CTR 33 | -0.6667 | -39.74 to 38.40  | No  | ns  |
| CTR 18 vs. HD 60  | 3       | -36.07 to 42.07  | No  | ns  |
| CTR 18 vs. HD 71  | 18      | -21.07 to 57.07  | No  | ns  |
| CTR 18 vs. HD 77  | -17.67  | -54.21 to 18.88  | No  | ns  |
| CTR 18 vs. HD 109 | 14      | -25.07 to 53.07  | No  | ns  |
| CTR 18 vs. HD 180 | -20.67  | -59.74 to 18.40  | No  | ns  |
| CTR 21 vs. CTR 28 | 53.5    | 16.95 to 90.05   | Yes | *** |
| CTR 21 vs. CTR 33 | 28      | -11.07 to 67.07  | No  | ns  |
| CTR 21 vs. HD 60  | 31.67   | -7.405 to 70.74  | No  | ns  |
| CTR 21 vs. HD 71  | 46.67   | 7.595 to 85.74   | Yes | **  |
| CTR 21 vs. HD 77  | 11      | -25.55 to 47.55  | No  | ns  |
| CTR 21 vs. HD 109 | 42.67   | 3.595 to 81.74   | Yes | *   |
| CTR 21 vs. HD 180 | 8       | -31.07 to 47.07  | No  | ns  |
| CTR 28 vs. CTR 33 | -25.5   | -62.05 to 11.05  | No  | ns  |
| CTR 28 vs. HD 60  | -21.83  | -58.38 to 14.71  | No  | ns  |
| CTR 28 vs. HD 71  | -6.833  | -43.38 to 29.71  | No  | ns  |
| CTR 28 vs. HD 77  | -42.5   | -76.34 to -8.663 | Yes | **  |
| CTR 28 vs. HD 109 | -10.83  | -47.38 to 25.71  | No  | ns  |
| CTR 28 vs. HD 180 | -45.5   | -82.05 to -8.952 | Yes | **  |
| CTR 33 vs. HD 60  | 3.667   | -35.40 to 42.74  | No  | ns  |
| CTR 33 vs. HD 71  | 18.67   | -20.40 to 57.74  | No  | ns  |
| CTR 33 vs. HD 77  | -17     | -53.55 to 19.55  | No  | ns  |
| CTR 33 vs. HD 109 | 14.67   | -24.40 to 53.74  | No  | ns  |
| CTR 33 vs. HD 180 | -20     | -59.07 to 19.07  | No  | ns  |
| HD 60 vs. HD 71   | 15      | -24.07 to 54.07  | No  | ns  |
| HD 60 vs. HD 77   | -20.67  | -57.21 to 15.88  | No  | ns  |
| HD 60 vs. HD 109  | 11      | -28.07 to 50.07  | No  | ns  |
| HD 60 vs. HD 180  | -23.67  | -62.74 to 15.40  | No  | ns  |
| HD 71 vs. HD 77   | -35.67  | -72.21 to 0.8812 | No  | ns  |
| HD 71 vs. HD 109  | -4      | -43.07 to 35.07  | No  | ns  |
| HD 71 vs. HD 180  | -38.67  | -77.74 to 0.4046 | No  | ns  |
| HD 77 vs. HD 109  | 31.67   | -4.881 to 68.21  | No  | ns  |
| HD 77 vs. HD 180  | -3      | -39.55 to 33.55  | No  | ns  |
| HD 109 vs. HD 180 | -34.67  | -73.74 to 4.405  | No  | ns  |

|                   |        |                 |    |    |
|-------------------|--------|-----------------|----|----|
| Day 14:           |        |                 |    |    |
| CTR 18 vs. CTR 21 | -12    | -61.62 to 37.62 | No | ns |
| CTR 18 vs. CTR 28 | 6.333  | -43.28 to 55.95 | No | ns |
| CTR 18 vs. CTR 33 | 3.667  | -45.95 to 53.28 | No | ns |
| CTR 18 vs. HD 60  | -8.333 | -57.95 to 41.28 | No | ns |
| CTR 18 vs. HD 71  | -14    | -63.62 to 35.62 | No | ns |
| CTR 18 vs. HD 77  | -17    | -66.62 to 32.62 | No | ns |
| CTR 18 vs. HD 109 | -16.33 | -65.95 to 33.28 | No | ns |
| CTR 18 vs. HD 180 | -28.67 | -78.28 to 20.95 | No | ns |
| CTR 21 vs. CTR 28 | 18.33  | -31.28 to 67.95 | No | ns |
| CTR 21 vs. CTR 33 | 15.67  | -33.95 to 65.28 | No | ns |
| CTR 21 vs. HD 60  | 3.667  | -45.95 to 53.28 | No | ns |
| CTR 21 vs. HD 71  | -2     | -51.62 to 47.62 | No | ns |
| CTR 21 vs. HD 77  | -5     | -54.62 to 44.62 | No | ns |
| CTR 21 vs. HD 109 | -4.333 | -53.95 to 45.28 | No | ns |
| CTR 21 vs. HD 180 | -16.67 | -66.28 to 32.95 | No | ns |
| CTR 28 vs. CTR 33 | -2.667 | -52.28 to 46.95 | No | ns |
| CTR 28 vs. HD 60  | -14.67 | -64.28 to 34.95 | No | ns |
| CTR 28 vs. HD 71  | -20.33 | -69.95 to 29.28 | No | ns |
| CTR 28 vs. HD 77  | -23.33 | -72.95 to 26.28 | No | ns |
| CTR 28 vs. HD 109 | -22.67 | -72.28 to 26.95 | No | ns |
| CTR 28 vs. HD 180 | -35    | -84.62 to 14.62 | No | ns |
| CTR 33 vs. HD 60  | -12    | -61.62 to 37.62 | No | ns |
| CTR 33 vs. HD 71  | -17.67 | -67.28 to 31.95 | No | ns |
| CTR 33 vs. HD 77  | -20.67 | -70.28 to 28.95 | No | ns |
| CTR 33 vs. HD 109 | -20    | -69.62 to 29.62 | No | ns |
| CTR 33 vs. HD 180 | -32.33 | -81.95 to 17.28 | No | ns |
| HD 60 vs. HD 71   | -5.667 | -55.28 to 43.95 | No | ns |
| HD 60 vs. HD 77   | -8.667 | -58.28 to 40.95 | No | ns |
| HD 60 vs. HD 109  | -8     | -57.62 to 41.62 | No | ns |
| HD 60 vs. HD 180  | -20.33 | -69.95 to 29.28 | No | ns |
| HD 71 vs. HD 77   | -3     | -52.62 to 46.62 | No | ns |
| HD 71 vs. HD 109  | -2.333 | -51.95 to 47.28 | No | ns |
| HD 71 vs. HD 180  | -14.67 | -64.28 to 34.95 | No | ns |
| HD 77 vs. HD 109  | 0.6667 | -48.95 to 50.28 | No | ns |
| HD 77 vs. HD 180  | -11.67 | -61.28 to 37.95 | No | ns |
| HD 109 vs. HD 180 | -12.33 | -61.95 to 37.28 | No | ns |
| Day 28:           |        |                 |    |    |
| CTR 18 vs. CTR 21 | 7.75   | -13.47 to 28.97 | No | ns |
| CTR 18 vs. CTR 28 | 13.25  | -7.968 to 34.47 | No | ns |
| CTR 18 vs. CTR 33 | 6      | -15.22 to 27.22 | No | ns |
| CTR 18 vs. HD 60  | -6.45  | -26.58 to 13.68 | No | ns |

|                   |          |                   |     |      |
|-------------------|----------|-------------------|-----|------|
| CTR 18 vs. HD 71  | -26.75   | -47.97 to -5.532  | Yes | **   |
| CTR 18 vs. HD 77  | -1.25    | -22.47 to 19.97   | No  | ns   |
| CTR 18 vs. HD 109 | -11      | -32.22 to 10.22   | No  | ns   |
| CTR 18 vs. HD 180 | -16.75   | -37.97 to 4.468   | No  | ns   |
| CTR 21 vs. CTR 28 | 5.5      | -15.72 to 26.72   | No  | ns   |
| CTR 21 vs. CTR 33 | -1.75    | -22.97 to 19.47   | No  | ns   |
| CTR 21 vs. HD 60  | -14.2    | -34.33 to 5.929   | No  | ns   |
| CTR 21 vs. HD 71  | -34.5    | -55.72 to -13.28  | Yes | ***  |
| CTR 21 vs. HD 77  | -9       | -30.22 to 12.22   | No  | ns   |
| CTR 21 vs. HD 109 | -18.75   | -39.97 to 2.468   | No  | ns   |
| CTR 21 vs. HD 180 | -24.5    | -45.72 to -3.282  | Yes | *    |
| CTR 28 vs. CTR 33 | -7.25    | -28.47 to 13.97   | No  | ns   |
| CTR 28 vs. HD 60  | -19.7    | -39.83 to 0.4291  | No  | ns   |
| CTR 28 vs. HD 71  | -40      | -61.22 to -18.78  | Yes | **** |
| CTR 28 vs. HD 77  | -14.5    | -35.72 to 6.718   | No  | ns   |
| CTR 28 vs. HD 109 | -24.25   | -45.47 to -3.032  | Yes | *    |
| CTR 28 vs. HD 180 | -30      | -51.22 to -8.782  | Yes | ***  |
| CTR 33 vs. HD 60  | -12.45   | -32.58 to 7.679   | No  | ns   |
| CTR 33 vs. HD 71  | -32.75   | -53.97 to -11.53  | Yes | ***  |
| CTR 33 vs. HD 77  | -7.25    | -28.47 to 13.97   | No  | ns   |
| CTR 33 vs. HD 109 | -17      | -38.22 to 4.218   | No  | ns   |
| CTR 33 vs. HD 180 | -22.75   | -43.97 to -1.532  | Yes | *    |
| HD 60 vs. HD 71   | -20.3    | -40.43 to -0.1709 | Yes | *    |
| HD 60 vs. HD 77   | 5.2      | -14.93 to 25.33   | No  | ns   |
| HD 60 vs. HD 109  | -4.55    | -24.68 to 15.58   | No  | ns   |
| HD 60 vs. HD 180  | -10.3    | -30.43 to 9.829   | No  | ns   |
| HD 71 vs. HD 77   | 25.5     | 4.282 to 46.72    | Yes | **   |
| HD 71 vs. HD 109  | 15.75    | -5.468 to 36.97   | No  | ns   |
| HD 71 vs. HD 180  | 10       | -11.22 to 31.22   | No  | ns   |
| HD 77 vs. HD 109  | -9.75    | -30.97 to 11.47   | No  | ns   |
| HD 77 vs. HD 180  | -15.5    | -36.72 to 5.718   | No  | ns   |
| HD 109 vs. HD 180 | -5.75    | -26.97 to 15.47   | No  | ns   |
| Day 42:           |          |                   |     |      |
| CTR 18 vs. CTR 21 | -0.654   | -7.201 to 5.893   | No  | ns   |
| CTR 18 vs. CTR 28 | 0.5407   | -6.007 to 7.088   | No  | ns   |
| CTR 18 vs. CTR 33 | -0.04801 | -6.595 to 6.499   | No  | ns   |
| CTR 18 vs. HD 60  | -2.053   | -10.92 to 6.812   | No  | ns   |
| CTR 18 vs. HD 71  | -7.871   | -14.42 to -1.324  | Yes | **   |
| CTR 18 vs. HD 77  | -6.414   | -12.96 to 0.1334  | No  | ns   |
| CTR 18 vs. HD 109 | -6.206   | -13.28 to 0.8655  | No  | ns   |
| CTR 18 vs. HD 180 | -4.986   | -12.45 to 2.479   | No  | ns   |
| CTR 21 vs. CTR 28 | 1.195    | -5.353 to 7.742   | No  | ns   |

|                   |         |                   |     |    |
|-------------------|---------|-------------------|-----|----|
| CTR 21 vs. CTR 33 | 0.606   | -5.941 to 7.153   | No  | ns |
| CTR 21 vs. HD 60  | -1.399  | -10.26 to 7.466   | No  | ns |
| CTR 21 vs. HD 71  | -7.217  | -13.76 to -0.6699 | Yes | *  |
| CTR 21 vs. HD 77  | -5.76   | -12.31 to 0.7874  | No  | ns |
| CTR 21 vs. HD 109 | -5.552  | -12.62 to 1.520   | No  | ns |
| CTR 21 vs. HD 180 | -4.332  | -11.80 to 3.133   | No  | ns |
| CTR 28 vs. CTR 33 | -0.5887 | -7.136 to 5.959   | No  | ns |
| CTR 28 vs. HD 60  | -2.594  | -11.46 to 6.271   | No  | ns |
| CTR 28 vs. HD 71  | -8.412  | -14.96 to -1.865  | Yes | ** |
| CTR 28 vs. HD 77  | -6.955  | -13.50 to -0.4073 | Yes | *  |
| CTR 28 vs. HD 109 | -6.747  | -13.82 to 0.3248  | No  | ns |
| CTR 28 vs. HD 180 | -5.527  | -12.99 to 1.938   | No  | ns |
| CTR 33 vs. HD 60  | -2.005  | -10.87 to 6.860   | No  | ns |
| CTR 33 vs. HD 71  | -7.823  | -14.37 to -1.276  | Yes | ** |
| CTR 33 vs. HD 77  | -6.366  | -12.91 to 0.1814  | No  | ns |
| CTR 33 vs. HD 109 | -6.158  | -13.23 to 0.9136  | No  | ns |
| CTR 33 vs. HD 180 | -4.938  | -12.40 to 2.527   | No  | ns |
| HD 60 vs. HD 71   | -5.818  | -14.68 to 3.047   | No  | ns |
| HD 60 vs. HD 77   | -4.361  | -13.23 to 4.505   | No  | ns |
| HD 60 vs. HD 109  | -4.153  | -13.41 to 5.106   | No  | ns |
| HD 60 vs. HD 180  | -2.933  | -12.50 to 6.630   | No  | ns |
| HD 71 vs. HD 77   | 1.457   | -5.090 to 8.005   | No  | ns |
| HD 71 vs. HD 109  | 1.665   | -5.407 to 8.737   | No  | ns |
| HD 71 vs. HD 180  | 2.885   | -4.580 to 10.35   | No  | ns |
| HD 77 vs. HD 109  | 0.2075  | -6.864 to 7.279   | No  | ns |
| HD 77 vs. HD 180  | 1.427   | -6.038 to 8.893   | No  | ns |
| HD 109 vs. HD 180 | 1.22    | -6.709 to 9.149   | No  | ns |
| Day 56:           |         |                   |     |    |
| CTR 18 vs. CTR 21 | -3.434  | -18.40 to 11.53   | No  | ns |
| CTR 18 vs. CTR 28 | -1.245  | -18.10 to 15.61   | No  | ns |
| CTR 18 vs. CTR 33 | -4.198  | -18.57 to 10.18   | No  | ns |
| CTR 18 vs. HD 60  | -1.163  | -19.72 to 17.40   | No  | ns |
| CTR 18 vs. HD 71  | -3.177  | -17.55 to 11.20   | No  | ns |
| CTR 18 vs. HD 77  | -4.95   | -19.33 to 9.426   | No  | ns |
| CTR 18 vs. HD 109 | -3.989  | -18.95 to 10.97   | No  | ns |
| CTR 18 vs. HD 180 | -15.52  | -34.07 to 3.045   | No  | ns |
| CTR 21 vs. CTR 28 | 2.189   | -15.17 to 19.55   | No  | ns |
| CTR 21 vs. CTR 33 | -0.7641 | -15.73 to 14.20   | No  | ns |
| CTR 21 vs. HD 60  | 2.271   | -16.75 to 21.29   | No  | ns |
| CTR 21 vs. HD 71  | 0.2567  | -14.71 to 15.22   | No  | ns |
| CTR 21 vs. HD 77  | -1.516  | -16.48 to 13.45   | No  | ns |
| CTR 21 vs. HD 109 | -0.5552 | -16.08 to 14.97   | No  | ns |

|                   |  |         |                 |     |    |
|-------------------|--|---------|-----------------|-----|----|
| CTR 21 vs. HD 180 |  | -12.08  | -31.10 to 6.937 | No  | ns |
| CTR 28 vs. CTR 33 |  | -2.953  | -19.81 to 13.90 | No  | ns |
| CTR 28 vs. HD 60  |  | 0.08265 | -20.46 to 20.62 | No  | ns |
| CTR 28 vs. HD 71  |  | -1.932  | -18.79 to 14.93 | No  | ns |
| CTR 28 vs. HD 77  |  | -3.705  | -20.56 to 13.15 | No  | ns |
| CTR 28 vs. HD 109 |  | -2.744  | -20.10 to 14.62 | No  | ns |
| CTR 28 vs. HD 180 |  | -14.27  | -34.81 to 6.272 | No  | ns |
| CTR 33 vs. HD 60  |  | 3.035   | -15.52 to 21.60 | No  | ns |
| CTR 33 vs. HD 71  |  | 1.021   | -13.36 to 15.40 | No  | ns |
| CTR 33 vs. HD 77  |  | -0.7518 | -15.13 to 13.62 | No  | ns |
| CTR 33 vs. HD 109 |  | 0.2088  | -14.75 to 15.17 | No  | ns |
| CTR 33 vs. HD 180 |  | -11.32  | -29.88 to 7.243 | No  | ns |
| HD 60 vs. HD 71   |  | -2.015  | -20.57 to 16.55 | No  | ns |
| HD 60 vs. HD 77   |  | -3.787  | -22.35 to 14.77 | No  | ns |
| HD 60 vs. HD 109  |  | -2.827  | -21.84 to 16.19 | No  | ns |
| HD 60 vs. HD 180  |  | -14.35  | -36.31 to 7.608 | No  | ns |
| HD 71 vs. HD 77   |  | -1.773  | -16.15 to 12.60 | No  | ns |
| HD 71 vs. HD 109  |  | -0.812  | -15.78 to 14.15 | No  | ns |
| HD 71 vs. HD 180  |  | -12.34  | -30.90 to 6.222 | No  | ns |
| HD 77 vs. HD 109  |  | 0.9607  | -14.00 to 15.92 | No  | ns |
| HD 77 vs. HD 180  |  | -10.57  | -29.12 to 7.995 | No  | ns |
| HD 109 vs. HD 180 |  | -11.53  | -30.54 to 7.492 | No  | ns |
|                   |  |         |                 |     |    |
| Day 80:           |  |         |                 |     |    |
| CTR 18 vs. CTR 21 |  | -0.822  | -11.44 to 9.795 | No  | ns |
| CTR 18 vs. CTR 28 |  | 0.1003  | -11.53 to 11.73 | No  | ns |
| CTR 18 vs. CTR 33 |  | 0.3426  | -10.27 to 10.96 | No  | ns |
| CTR 18 vs. HD 60  |  | 9.507   | -1.110 to 20.12 | No  | ns |
| CTR 18 vs. HD 71  |  | -1.745  | -12.36 to 8.872 | No  | ns |
| CTR 18 vs. HD 77  |  | -2.121  | -12.74 to 8.496 | No  | ns |
| CTR 18 vs. HD 109 |  | -0.7649 | -11.38 to 9.852 | No  | ns |
| CTR 18 vs. HD 180 |  | 1.296   | -9.321 to 11.91 | No  | ns |
| CTR 21 vs. CTR 28 |  | 0.9223  | -9.694 to 11.54 | No  | ns |
| CTR 21 vs. CTR 33 |  | 1.165   | -8.331 to 10.66 | No  | ns |
| CTR 21 vs. HD 60  |  | 10.33   | 0.8326 to 19.82 | Yes | *  |
| CTR 21 vs. HD 71  |  | -0.9232 | -10.42 to 8.573 | No  | ns |
| CTR 21 vs. HD 77  |  | -1.299  | -10.80 to 8.197 | No  | ns |
| CTR 21 vs. HD 109 |  | 0.05714 | -9.439 to 9.553 | No  | ns |
| CTR 21 vs. HD 180 |  | 2.118   | -7.378 to 11.61 | No  | ns |
| CTR 28 vs. CTR 33 |  | 0.2423  | -10.37 to 10.86 | No  | ns |
| CTR 28 vs. HD 60  |  | 9.406   | -1.211 to 20.02 | No  | ns |
| CTR 28 vs. HD 71  |  | -1.846  | -12.46 to 8.771 | No  | ns |
| CTR 28 vs. HD 77  |  | -2.221  | -12.84 to 8.395 | No  | ns |

|                                                               |            |         |                   |              |         |
|---------------------------------------------------------------|------------|---------|-------------------|--------------|---------|
| CTR 28 vs. HD 109                                             |            | -0.8652 | -11.48 to 9.752   | No           | ns      |
| CTR 28 vs. HD 180                                             |            | 1.195   | -9.421 to 11.81   | No           | ns      |
| CTR 33 vs. HD 60                                              |            | 9.164   | -0.3320 to 18.66  | No           | ns      |
| CTR 33 vs. HD 71                                              |            | -2.088  | -11.58 to 7.408   | No           | ns      |
| CTR 33 vs. HD 77                                              |            | -2.464  | -11.96 to 7.032   | No           | ns      |
| CTR 33 vs. HD 109                                             |            | -1.107  | -10.60 to 8.388   | No           | ns      |
| CTR 33 vs. HD 180                                             |            | 0.9531  | -8.543 to 10.45   | No           | ns      |
| HD 60 vs. HD 71                                               |            | -11.25  | -20.75 to -1.756  | Yes          | *       |
| HD 60 vs. HD 77                                               |            | -11.63  | -21.12 to -2.132  | Yes          | **      |
| HD 60 vs. HD 109                                              |            | -10.27  | -19.77 to -0.7755 | Yes          | *       |
| HD 60 vs. HD 180                                              |            | -8.211  | -17.71 to 1.285   | No           | ns      |
| HD 71 vs. HD 77                                               |            | -0.3759 | -9.872 to 9.120   | No           | ns      |
| HD 71 vs. HD 109                                              |            | 0.9803  | -8.516 to 10.48   | No           | ns      |
| HD 71 vs. HD 180                                              |            | 3.041   | -6.455 to 12.54   | No           | ns      |
| HD 77 vs. HD 109                                              |            | 1.356   | -8.140 to 10.85   | No           | ns      |
| HD 77 vs. HD 180                                              |            | 3.417   | -6.079 to 12.91   | No           | ns      |
| HD 109 vs. HD 180                                             |            | 2.061   | -7.435 to 11.56   | No           | ns      |
|                                                               |            |         |                   |              |         |
|                                                               |            |         |                   |              |         |
| <b>One-way ANOVA (between time points, within cell lines)</b> |            |         |                   |              |         |
| Bonferroni's multiple comparisons test                        | Mean Diff. |         | 95% CI of diff.   | Significant? | Summary |
|                                                               |            |         |                   |              |         |
| CTR 18:                                                       |            |         |                   |              |         |
| Day 0 vs. Day 7                                               |            | 30.67   | 12.54 to 48.79    | Yes          | ***     |
| Day 0 vs. Day 14                                              |            | 38.33   | 20.21 to 56.46    | Yes          | ****    |
| Day 0 vs. Day 28                                              |            | 47.25   | 30.29 to 64.21    | Yes          | ****    |
| Day 0 vs. Day 42                                              |            | 46.82   | 31.79 to 61.85    | Yes          | ****    |
| Day 0 vs. Day 56                                              |            | 51.15   | 35.83 to 66.47    | Yes          | ****    |
| Day 0 vs. Day 80                                              |            | 54.49   | 34.23 to 74.76    | Yes          | ****    |
| Day 7 vs. Day 14                                              |            | 7.667   | -10.46 to 25.79   | No           | ns      |
| Day 7 vs. Day 28                                              |            | 16.58   | -0.3741 to 33.54  | No           | ns      |
| Day 7 vs. Day 42                                              |            | 16.16   | 1.124 to 31.19    | Yes          | *       |
| Day 7 vs. Day 56                                              |            | 20.48   | 5.164 to 35.81    | Yes          | **      |
| Day 7 vs. Day 80                                              |            | 23.83   | 3.559 to 44.09    | Yes          | *       |
| Day 14 vs. Day 28                                             |            | 8.917   | -8.041 to 25.87   | No           | ns      |
| Day 14 vs. Day 42                                             |            | 8.489   | -6.542 to 23.52   | No           | ns      |
| Day 14 vs. Day 56                                             |            | 12.82   | -2.503 to 28.14   | No           | ns      |
| Day 14 vs. Day 80                                             |            | 16.16   | -4.108 to 36.43   | No           | ns      |
| Day 28 vs. Day 42                                             |            | -0.4279 | -14.02 to 13.17   | No           | ns      |
| Day 28 vs. Day 56                                             |            | 3.901   | -10.01 to 17.82   | No           | ns      |
| Day 28 vs. Day 80                                             |            | 7.243   | -11.98 to 26.47   | No           | ns      |
| Day 42 vs. Day 56                                             |            | 4.329   | -7.162 to 15.82   | No           | ns      |
| Day 42 vs. Day 80                                             |            | 7.671   | -9.881 to 25.22   | No           | ns      |

|                   |  |         |                 |     |      |
|-------------------|--|---------|-----------------|-----|------|
| Day 56 vs. Day 80 |  | 3.342   | -14.46 to 21.14 | No  | ns   |
|                   |  |         |                 |     |      |
| CTR 21:           |  |         |                 |     |      |
| Day 0 vs. Day 7   |  | 4       | -15.16 to 23.16 | No  | ns   |
| Day 0 vs. Day 14  |  | 28.33   | 9.174 to 47.49  | Yes | ***  |
| Day 0 vs. Day 28  |  | 57      | 39.08 to 74.92  | Yes | **** |
| Day 0 vs. Day 42  |  | 48.17   | 32.28 to 64.05  | Yes | **** |
| Day 0 vs. Day 56  |  | 49.72   | 33.13 to 66.31  | Yes | **** |
| Day 0 vs. Day 80  |  | 55.67   | 36.51 to 74.83  | Yes | **** |
| Day 7 vs. Day 14  |  | 24.33   | 5.174 to 43.49  | Yes | **   |
| Day 7 vs. Day 28  |  | 53      | 35.08 to 70.92  | Yes | **** |
| Day 7 vs. Day 42  |  | 44.17   | 28.28 to 60.05  | Yes | **** |
| Day 7 vs. Day 56  |  | 45.72   | 29.13 to 62.31  | Yes | **** |
| Day 7 vs. Day 80  |  | 51.67   | 32.51 to 70.83  | Yes | **** |
| Day 14 vs. Day 28 |  | 28.67   | 10.75 to 46.59  | Yes | ***  |
| Day 14 vs. Day 42 |  | 19.83   | 3.949 to 35.72  | Yes | **   |
| Day 14 vs. Day 56 |  | 21.38   | 4.792 to 37.98  | Yes | **   |
| Day 14 vs. Day 80 |  | 27.34   | 8.179 to 46.50  | Yes | **   |
| Day 28 vs. Day 42 |  | -8.832  | -23.20 to 5.537 | No  | ns   |
| Day 28 vs. Day 56 |  | -7.283  | -22.43 to 7.864 | No  | ns   |
| Day 28 vs. Day 80 |  | -1.329  | -19.25 to 16.59 | No  | ns   |
| Day 42 vs. Day 56 |  | 1.549   | -11.12 to 14.22 | No  | ns   |
| Day 42 vs. Day 80 |  | 7.503   | -8.382 to 23.39 | No  | ns   |
| Day 56 vs. Day 80 |  | 5.954   | -10.64 to 22.55 | No  | ns   |
|                   |  |         |                 |     |      |
| CTR 28:           |  |         |                 |     |      |
| Day 0 vs. Day 7   |  | 26.17   | 1.395 to 50.94  | Yes | *    |
| Day 0 vs. Day 14  |  | 15.33   | -11.15 to 41.82 | No  | ns   |
| Day 0 vs. Day 28  |  | 31.17   | 6.395 to 55.94  | Yes | **   |
| Day 0 vs. Day 42  |  | 18.03   | -3.929 to 39.99 | No  | ns   |
| Day 0 vs. Day 56  |  | 20.57   | -4.200 to 45.34 | No  | ns   |
| Day 0 vs. Day 80  |  | 25.26   | -4.348 to 54.87 | No  | ns   |
| Day 7 vs. Day 14  |  | -10.83  | -35.61 to 13.94 | No  | ns   |
| Day 7 vs. Day 28  |  | 5       | -17.93 to 27.93 | No  | ns   |
| Day 7 vs. Day 42  |  | -8.137  | -28.00 to 11.72 | No  | ns   |
| Day 7 vs. Day 56  |  | -5.594  | -28.53 to 17.34 | No  | ns   |
| Day 7 vs. Day 80  |  | -0.9062 | -29.00 to 27.18 | No  | ns   |
| Day 14 vs. Day 28 |  | 15.83   | -8.939 to 40.61 | No  | ns   |
| Day 14 vs. Day 42 |  | 2.696   | -19.26 to 24.65 | No  | ns   |
| Day 14 vs. Day 56 |  | 5.239   | -19.53 to 30.01 | No  | ns   |
| Day 14 vs. Day 80 |  | 9.927   | -19.68 to 39.54 | No  | ns   |
| Day 28 vs. Day 42 |  | -13.14  | -33.00 to 6.725 | No  | ns   |
| Day 28 vs. Day 56 |  | -10.59  | -33.53 to 12.34 | No  | ns   |



|                   |  |        |                 |    |    |
|-------------------|--|--------|-----------------|----|----|
| Day 28 vs. Day 80 |  | -5.906 | -34.00 to 22.18 | No | ns |
| Day 42 vs. Day 56 |  | 2.543  | -17.32 to 22.40 | No | ns |
| Day 42 vs. Day 80 |  | 7.231  | -18.41 to 32.87 | No | ns |
| Day 56 vs. Day 80 |  | 4.688  | -23.40 to 32.78 | No | ns |
| CTR 33:           |  |        |                 |    |    |
| Day 0 vs. Day 7   |  | 1      | -26.11 to 28.11 | No | ns |
| Day 0 vs. Day 14  |  | 13     | -14.11 to 40.11 | No | ns |
| Day 0 vs. Day 28  |  | 24.25  | -1.107 to 49.61 | No | ns |
| Day 0 vs. Day 42  |  | 17.77  | -4.702 to 40.25 | No | ns |
| Day 0 vs. Day 56  |  | 17.95  | -4.957 to 40.86 | No | ns |
| Day 0 vs. Day 80  |  | 25.84  | -1.271 to 52.94 | No | ns |
| Day 7 vs. Day 14  |  | 12     | -15.11 to 39.11 | No | ns |
| Day 7 vs. Day 28  |  | 23.25  | -2.107 to 48.61 | No | ns |
| Day 7 vs. Day 42  |  | 16.77  | -5.702 to 39.25 | No | ns |
| Day 7 vs. Day 56  |  | 16.95  | -5.957 to 39.86 | No | ns |
| Day 7 vs. Day 80  |  | 24.84  | -2.271 to 51.94 | No | ns |
| Day 14 vs. Day 28 |  | 11.25  | -14.11 to 36.61 | No | ns |
| Day 14 vs. Day 42 |  | 4.774  | -17.70 to 27.25 | No | ns |
| Day 14 vs. Day 56 |  | 4.953  | -17.96 to 27.86 | No | ns |
| Day 14 vs. Day 80 |  | 12.84  | -14.27 to 39.94 | No | ns |
| Day 28 vs. Day 42 |  | -6.476 | -26.81 to 13.85 | No | ns |
| Day 28 vs. Day 56 |  | -6.297 | -27.11 to 14.51 | No | ns |
| Day 28 vs. Day 80 |  | 1.586  | -23.77 to 26.94 | No | ns |
| Day 42 vs. Day 56 |  | 0.1791 | -17.00 to 17.36 | No | ns |
| Day 42 vs. Day 80 |  | 8.062  | -14.41 to 30.54 | No | ns |
| Day 56 vs. Day 80 |  | 7.883  | -15.03 to 30.79 | No | ns |
| HD 60:            |  |        |                 |    |    |
| Day 0 vs. Day 7   |  | 0.3333 | -44.06 to 44.73 | No | ns |
| Day 0 vs. Day 14  |  | -3.333 | -47.73 to 41.06 | No | ns |
| Day 0 vs. Day 28  |  | 7.467  | -32.24 to 47.17 | No | ns |
| Day 0 vs. Day 42  |  | 11.44  | -32.96 to 55.83 | No | ns |
| Day 0 vs. Day 56  |  | 16.66  | -27.74 to 61.05 | No | ns |
| Day 7 vs. Day 14  |  | -3.667 | -48.06 to 40.73 | No | ns |
| Day 7 vs. Day 28  |  | 7.133  | -32.57 to 46.84 | No | ns |
| Day 7 vs. Day 42  |  | 11.1   | -33.29 to 55.49 | No | ns |
| Day 7 vs. Day 56  |  | 16.32  | -28.07 to 60.71 | No | ns |
| Day 14 vs. Day 28 |  | 10.8   | -28.91 to 50.51 | No | ns |
| Day 14 vs. Day 42 |  | 14.77  | -29.62 to 59.16 | No | ns |
| Day 14 vs. Day 56 |  | 19.99  | -24.40 to 64.38 | No | ns |
| Day 28 vs. Day 42 |  | 3.969  | -35.74 to 43.67 | No | ns |
| Day 28 vs. Day 56 |  | 9.188  | -30.52 to 48.89 | No | ns |

|                   |         |                  |     |      |
|-------------------|---------|------------------|-----|------|
| Day 42 vs. Day 56 | 5.22    | -39.17 to 49.61  | No  | ns   |
|                   |         |                  |     |      |
| <b>HD 71:</b>     |         |                  |     |      |
| Day 0 vs. Day 7   | 18.67   | -13.80 to 51.14  | No  | ns   |
| Day 0 vs. Day 14  | -5.667  | -38.14 to 26.80  | No  | ns   |
| Day 0 vs. Day 28  | -9.5    | -39.87 to 20.87  | No  | ns   |
| Day 0 vs. Day 42  | 8.951   | -17.97 to 35.87  | No  | ns   |
| Day 0 vs. Day 56  | 17.97   | -9.468 to 45.42  | No  | ns   |
| Day 0 vs. Day 80  | 22.75   | -9.721 to 55.22  | No  | ns   |
| Day 7 vs. Day 14  | -24.33  | -56.80 to 8.136  | No  | ns   |
| Day 7 vs. Day 28  | -28.17  | -58.54 to 2.206  | No  | ns   |
| Day 7 vs. Day 42  | -9.716  | -36.64 to 17.21  | No  | ns   |
| Day 7 vs. Day 56  | -0.6927 | -28.13 to 26.75  | No  | ns   |
| Day 7 vs. Day 80  | 4.082   | -28.39 to 36.55  | No  | ns   |
| Day 14 vs. Day 28 | -3.833  | -34.21 to 26.54  | No  | ns   |
| Day 14 vs. Day 42 | 14.62   | -12.30 to 41.54  | No  | ns   |
| Day 14 vs. Day 56 | 23.64   | -3.801 to 51.08  | No  | ns   |
| Day 14 vs. Day 80 | 28.41   | -4.054 to 60.88  | No  | ns   |
| Day 28 vs. Day 42 | 18.45   | -5.901 to 42.80  | No  | ns   |
| Day 28 vs. Day 56 | 27.47   | 2.549 to 52.40   | Yes | *    |
| Day 28 vs. Day 80 | 32.25   | 1.876 to 62.62   | Yes | *    |
| Day 42 vs. Day 56 | 9.023   | -11.56 to 29.60  | No  | ns   |
| Day 42 vs. Day 80 | 13.8    | -13.12 to 40.72  | No  | ns   |
| Day 56 vs. Day 80 | 4.774   | -22.67 to 32.22  | No  | ns   |
|                   |         |                  |     |      |
| <b>HD 77:</b>     |         |                  |     |      |
| Day 0 vs. Day 7   | 24.67   | -4.498 to 53.83  | No  | ns   |
| Day 0 vs. Day 14  | 33      | 1.822 to 64.18   | Yes | *    |
| Day 0 vs. Day 28  | 57.67   | 28.50 to 86.83   | Yes | **** |
| Day 0 vs. Day 42  | 52.07   | 26.22 to 77.93   | Yes | **** |
| Day 0 vs. Day 56  | 57.87   | 31.52 to 84.22   | Yes | **** |
| Day 0 vs. Day 80  | 64.04   | 32.86 to 95.22   | Yes | **** |
| Day 7 vs. Day 14  | 8.333   | -20.83 to 37.50  | No  | ns   |
| Day 7 vs. Day 28  | 33      | 5.999 to 60.00   | Yes | **   |
| Day 7 vs. Day 42  | 27.41   | 4.024 to 50.79   | Yes | *    |
| Day 7 vs. Day 56  | 33.2    | 9.267 to 57.14   | Yes | **   |
| Day 7 vs. Day 80  | 39.37   | 10.21 to 68.54   | Yes | **   |
| Day 14 vs. Day 28 | 24.67   | -4.498 to 53.83  | No  | ns   |
| Day 14 vs. Day 42 | 19.07   | -6.777 to 44.93  | No  | ns   |
| Day 14 vs. Day 56 | 24.87   | -1.483 to 51.22  | No  | ns   |
| Day 14 vs. Day 80 | 31.04   | -0.1393 to 62.22 | No  | ns   |
| Day 28 vs. Day 42 | -5.592  | -28.98 to 17.79  | No  | ns   |
| Day 28 vs. Day 56 | 0.2013  | -23.73 to 24.14  | No  | ns   |

|                   |  |         |                  |     |      |
|-------------------|--|---------|------------------|-----|------|
| Day 28 vs. Day 80 |  | 6.372   | -22.79 to 35.54  | No  | ns   |
| Day 42 vs. Day 56 |  | 5.793   | -13.97 to 25.56  | No  | ns   |
| Day 42 vs. Day 80 |  | 11.96   | -13.89 to 37.82  | No  | ns   |
| Day 56 vs. Day 80 |  | 6.171   | -20.18 to 32.52  | No  | ns   |
| HD 109:           |  |         |                  |     |      |
| Day 0 vs. Day 7   |  | 10.67   | -8.350 to 29.68  | No  | ns   |
| Day 0 vs. Day 14  |  | -12     | -31.02 to 7.017  | No  | ns   |
| Day 0 vs. Day 28  |  | 2.25    | -15.54 to 20.04  | No  | ns   |
| Day 0 vs. Day 42  |  | 6.616   | -9.853 to 23.08  | No  | ns   |
| Day 0 vs. Day 56  |  | 13.16   | -3.307 to 29.63  | No  | ns   |
| Day 0 vs. Day 80  |  | 19.73   | 0.7118 to 38.75  | Yes | *    |
| Day 7 vs. Day 14  |  | -22.67  | -41.68 to -3.650 | Yes | *    |
| Day 7 vs. Day 28  |  | -8.417  | -26.21 to 9.372  | No  | ns   |
| Day 7 vs. Day 42  |  | -4.051  | -20.52 to 12.42  | No  | ns   |
| Day 7 vs. Day 56  |  | 2.495   | -13.97 to 18.96  | No  | ns   |
| Day 7 vs. Day 80  |  | 9.062   | -9.955 to 28.08  | No  | ns   |
| Day 14 vs. Day 28 |  | 14.25   | -3.539 to 32.04  | No  | ns   |
| Day 14 vs. Day 42 |  | 18.62   | 2.147 to 35.08   | Yes | *    |
| Day 14 vs. Day 56 |  | 25.16   | 8.693 to 41.63   | Yes | ***  |
| Day 14 vs. Day 80 |  | 31.73   | 12.71 to 50.75   | Yes | ***  |
| Day 28 vs. Day 42 |  | 4.366   | -10.67 to 19.40  | No  | ns   |
| Day 28 vs. Day 56 |  | 10.91   | -4.122 to 25.95  | No  | ns   |
| Day 28 vs. Day 80 |  | 17.48   | -0.3100 to 35.27 | No  | ns   |
| Day 42 vs. Day 56 |  | 6.546   | -6.901 to 19.99  | No  | ns   |
| Day 42 vs. Day 80 |  | 13.11   | -3.356 to 29.58  | No  | ns   |
| Day 56 vs. Day 80 |  | 6.567   | -9.902 to 23.04  | No  | ns   |
| HD 180:           |  |         |                  |     |      |
| Day 0 vs. Day 7   |  | 23.33   | 2.727 to 43.94   | Yes | *    |
| Day 0 vs. Day 14  |  | 23      | 2.394 to 43.61   | Yes | *    |
| Day 0 vs. Day 28  |  | 43.83   | 24.56 to 63.11   | Yes | **** |
| Day 0 vs. Day 42  |  | 55.17   | 36.74 to 73.60   | Yes | **** |
| Day 0 vs. Day 56  |  | 48.97   | 28.36 to 69.58   | Yes | **** |
| Day 0 vs. Day 80  |  | 69.12   | 48.52 to 89.73   | Yes | **** |
| Day 7 vs. Day 14  |  | -0.3333 | -20.94 to 20.27  | No  | ns   |
| Day 7 vs. Day 28  |  | 20.5    | 1.225 to 39.78   | Yes | *    |
| Day 7 vs. Day 42  |  | 31.84   | 13.40 to 50.27   | Yes | ***  |
| Day 7 vs. Day 56  |  | 25.64   | 5.030 to 46.24   | Yes | **   |
| Day 7 vs. Day 80  |  | 45.79   | 25.18 to 66.40   | Yes | **** |
| Day 14 vs. Day 28 |  | 20.83   | 1.558 to 40.11   | Yes | *    |
| Day 14 vs. Day 42 |  | 32.17   | 13.74 to 50.60   | Yes | ***  |
| Day 14 vs. Day 56 |  | 25.97   | 5.363 to 46.58   | Yes | **   |

|                   |        |                  |     |      |
|-------------------|--------|------------------|-----|------|
| Day 14 vs. Day 80 | 46.12  | 25.52 to 66.73   | Yes | **** |
| Day 28 vs. Day 42 | 11.34  | -5.594 to 28.27  | No  | ns   |
| Day 28 vs. Day 56 | 5.136  | -14.14 to 24.41  | No  | ns   |
| Day 28 vs. Day 80 | 25.29  | 6.014 to 44.56   | Yes | **   |
| Day 42 vs. Day 56 | -6.199 | -24.63 to 12.23  | No  | ns   |
| Day 42 vs. Day 80 | 13.95  | -4.477 to 32.38  | No  | ns   |
| Day 56 vs. Day 80 | 20.15  | -0.4533 to 40.76 | No  | ns   |
|                   |        |                  |     |      |
|                   |        |                  |     |      |

**TuJ1**

| <b>Two-way ANOVA</b> |                      |          |                 |              |
|----------------------|----------------------|----------|-----------------|--------------|
| Source of Variation  | % of total variation | P value  | P value summary | Significant? |
| Interaction          | 19.7                 | 0.0001   | ***             | Yes          |
| Row Factor           | 5.727                | 0.0004   | ***             | Yes          |
| Column Factor        | 38.98                | < 0.0001 | ****            | Yes          |
|                      |                      |          |                 |              |

**One-way ANOVA (between cell lines, within time point)**

| Bonferroni's multiple comparisons test | Mean Diff. | 95% CI of diff. | Significant? | Summary |
|----------------------------------------|------------|-----------------|--------------|---------|
| Day 0:                                 |            |                 |              |         |
| CTR 18 vs. CTR 21                      | 1          | -2.607 to 4.607 | No           | ns      |
| CTR 18 vs. CTR 28                      | 1.333      | -2.274 to 4.941 | No           | ns      |
| CTR 18 vs. CTR 33                      | 1.333      | -2.274 to 4.941 | No           | ns      |
| CTR 18 vs. HD 60                       | 0.3333     | -3.274 to 3.941 | No           | ns      |
| CTR 18 vs. HD 71                       | 1.333      | -2.274 to 4.941 | No           | ns      |
| CTR 18 vs. HD 77                       | 1          | -2.607 to 4.607 | No           | ns      |
| CTR 18 vs. HD 109                      | -0.6667    | -4.274 to 2.941 | No           | ns      |
| CTR 18 vs. HD 180                      | 0.6667     | -2.941 to 4.274 | No           | ns      |
| CTR 21 vs. CTR 28                      | 0.3333     | -3.274 to 3.941 | No           | ns      |
| CTR 21 vs. CTR 33                      | 0.3333     | -3.274 to 3.941 | No           | ns      |
| CTR 21 vs. HD 60                       | -0.6667    | -4.274 to 2.941 | No           | ns      |
| CTR 21 vs. HD 71                       | 0.3333     | -3.274 to 3.941 | No           | ns      |
| CTR 21 vs. HD 77                       | 0          | -3.607 to 3.607 | No           | ns      |
| CTR 21 vs. HD 109                      | -1.667     | -5.274 to 1.941 | No           | ns      |
| CTR 21 vs. HD 180                      | -0.3333    | -3.941 to 3.274 | No           | ns      |
| CTR 28 vs. CTR 33                      | 0          | -3.607 to 3.607 | No           | ns      |
| CTR 28 vs. HD 60                       | -1         | -4.607 to 2.607 | No           | ns      |
| CTR 28 vs. HD 71                       | 0          | -3.607 to 3.607 | No           | ns      |
| CTR 28 vs. HD 77                       | -0.3333    | -3.941 to 3.274 | No           | ns      |
| CTR 28 vs. HD 109                      | -2         | -5.607 to 1.607 | No           | ns      |
| CTR 28 vs. HD 180                      | -0.6667    | -4.274 to 2.941 | No           | ns      |
| CTR 33 vs. HD 60                       | -1         | -4.607 to 2.607 | No           | ns      |

|                   |         |                  |    |    |
|-------------------|---------|------------------|----|----|
| CTR 33 vs. HD 71  | 0       | -3.607 to 3.607  | No | ns |
| CTR 33 vs. HD 77  | -0.3333 | -3.941 to 3.274  | No | ns |
| CTR 33 vs. HD 109 | -2      | -5.607 to 1.607  | No | ns |
| CTR 33 vs. HD 180 | -0.6667 | -4.274 to 2.941  | No | ns |
| HD 60 vs. HD 71   | 1       | -2.607 to 4.607  | No | ns |
| HD 60 vs. HD 77   | 0.6667  | -2.941 to 4.274  | No | ns |
| HD 60 vs. HD 109  | -1      | -4.607 to 2.607  | No | ns |
| HD 60 vs. HD 180  | 0.3333  | -3.274 to 3.941  | No | ns |
| HD 71 vs. HD 77   | -0.3333 | -3.941 to 3.274  | No | ns |
| HD 71 vs. HD 109  | -2      | -5.607 to 1.607  | No | ns |
| HD 71 vs. HD 180  | -0.6667 | -4.274 to 2.941  | No | ns |
| HD 77 vs. HD 109  | -1.667  | -5.274 to 1.941  | No | ns |
| HD 77 vs. HD 180  | -0.3333 | -3.941 to 3.274  | No | ns |
| HD 109 vs. HD 180 | 1.333   | -2.274 to 4.941  | No | ns |
|                   |         |                  |    |    |
| Day 7:            |         |                  |    |    |
| CTR 18 vs. CTR 21 | -2.667  | -14.37 to 9.035  | No | ns |
| CTR 18 vs. CTR 28 | 3       | -10.08 to 16.08  | No | ns |
| CTR 18 vs. CTR 33 | 1       | -12.08 to 14.08  | No | ns |
| CTR 18 vs. HD 60  | -2      | -13.70 to 9.701  | No | ns |
| CTR 18 vs. HD 71  | 2.333   | -9.368 to 14.03  | No | ns |
| CTR 18 vs. HD 77  | -9.667  | -21.37 to 2.035  | No | ns |
| CTR 18 vs. HD 109 | 2.333   | -9.368 to 14.03  | No | ns |
| CTR 18 vs. HD 180 | -2      | -13.70 to 9.701  | No | ns |
| CTR 21 vs. CTR 28 | 5.667   | -7.416 to 18.75  | No | ns |
| CTR 21 vs. CTR 33 | 3.667   | -9.416 to 16.75  | No | ns |
| CTR 21 vs. HD 60  | 0.6667  | -11.03 to 12.37  | No | ns |
| CTR 21 vs. HD 71  | 5       | -6.701 to 16.70  | No | ns |
| CTR 21 vs. HD 77  | -7      | -18.70 to 4.701  | No | ns |
| CTR 21 vs. HD 109 | 5       | -6.701 to 16.70  | No | ns |
| CTR 21 vs. HD 180 | 0.6667  | -11.03 to 12.37  | No | ns |
| CTR 28 vs. CTR 33 | -2      | -16.33 to 12.33  | No | ns |
| CTR 28 vs. HD 60  | -5      | -18.08 to 8.082  | No | ns |
| CTR 28 vs. HD 71  | -0.6667 | -13.75 to 12.42  | No | ns |
| CTR 28 vs. HD 77  | -12.67  | -25.75 to 0.4157 | No | ns |
| CTR 28 vs. HD 109 | -0.6667 | -13.75 to 12.42  | No | ns |
| CTR 28 vs. HD 180 | -5      | -18.08 to 8.082  | No | ns |
| CTR 33 vs. HD 60  | -3      | -16.08 to 10.08  | No | ns |
| CTR 33 vs. HD 71  | 1.333   | -11.75 to 14.42  | No | ns |
| CTR 33 vs. HD 77  | -10.67  | -23.75 to 2.416  | No | ns |
| CTR 33 vs. HD 109 | 1.333   | -11.75 to 14.42  | No | ns |
| CTR 33 vs. HD 180 | -3      | -16.08 to 10.08  | No | ns |
| HD 60 vs. HD 71   | 4.333   | -7.368 to 16.03  | No | ns |

|                   |        |                   |     |    |
|-------------------|--------|-------------------|-----|----|
| HD 60 vs. HD 77   | -7.667 | -19.37 to 4.035   | No  | ns |
| HD 60 vs. HD 109  | 4.333  | -7.368 to 16.03   | No  | ns |
| HD 60 vs. HD 180  | 0      | -11.70 to 11.70   | No  | ns |
| HD 71 vs. HD 77   | -12    | -23.70 to -0.2988 | Yes | *  |
| HD 71 vs. HD 109  | 0      | -11.70 to 11.70   | No  | ns |
| HD 71 vs. HD 180  | -4.333 | -16.03 to 7.368   | No  | ns |
| HD 77 vs. HD 109  | 12     | 0.2988 to 23.70   | Yes | *  |
| HD 77 vs. HD 180  | 7.667  | -4.035 to 19.37   | No  | ns |
| HD 109 vs. HD 180 | -4.333 | -16.03 to 7.368   | No  | ns |
| Day 14:           |        |                   |     |    |
| CTR 18 vs. CTR 21 | -8.333 | -31.80 to 15.14   | No  | ns |
| CTR 18 vs. CTR 28 | 11     | -12.47 to 34.47   | No  | ns |
| CTR 18 vs. CTR 33 | 5.333  | -18.14 to 28.80   | No  | ns |
| CTR 18 vs. HD 60  | 2.333  | -21.14 to 25.80   | No  | ns |
| CTR 18 vs. HD 71  | 7.333  | -16.14 to 30.80   | No  | ns |
| CTR 18 vs. HD 77  | -4.667 | -28.14 to 18.80   | No  | ns |
| CTR 18 vs. HD 109 | 3.667  | -19.80 to 27.14   | No  | ns |
| CTR 18 vs. HD 180 | 0      | -23.47 to 23.47   | No  | ns |
| CTR 21 vs. CTR 28 | 19.33  | -4.136 to 42.80   | No  | ns |
| CTR 21 vs. CTR 33 | 13.67  | -9.802 to 37.14   | No  | ns |
| CTR 21 vs. HD 60  | 10.67  | -12.80 to 34.14   | No  | ns |
| CTR 21 vs. HD 71  | 15.67  | -7.802 to 39.14   | No  | ns |
| CTR 21 vs. HD 77  | 3.667  | -19.80 to 27.14   | No  | ns |
| CTR 21 vs. HD 109 | 12     | -11.47 to 35.47   | No  | ns |
| CTR 21 vs. HD 180 | 8.333  | -15.14 to 31.80   | No  | ns |
| CTR 28 vs. CTR 33 | -5.667 | -29.14 to 17.80   | No  | ns |
| CTR 28 vs. HD 60  | -8.667 | -32.14 to 14.80   | No  | ns |
| CTR 28 vs. HD 71  | -3.667 | -27.14 to 19.80   | No  | ns |
| CTR 28 vs. HD 77  | -15.67 | -39.14 to 7.802   | No  | ns |
| CTR 28 vs. HD 109 | -7.333 | -30.80 to 16.14   | No  | ns |
| CTR 28 vs. HD 180 | -11    | -34.47 to 12.47   | No  | ns |
| CTR 33 vs. HD 60  | -3     | -26.47 to 20.47   | No  | ns |
| CTR 33 vs. HD 71  | 2      | -21.47 to 25.47   | No  | ns |
| CTR 33 vs. HD 77  | -10    | -33.47 to 13.47   | No  | ns |
| CTR 33 vs. HD 109 | -1.667 | -25.14 to 21.80   | No  | ns |
| CTR 33 vs. HD 180 | -5.333 | -28.80 to 18.14   | No  | ns |
| HD 60 vs. HD 71   | 5      | -18.47 to 28.47   | No  | ns |
| HD 60 vs. HD 77   | -7     | -30.47 to 16.47   | No  | ns |
| HD 60 vs. HD 109  | 1.333  | -22.14 to 24.80   | No  | ns |
| HD 60 vs. HD 180  | -2.333 | -25.80 to 21.14   | No  | ns |
| HD 71 vs. HD 77   | -12    | -35.47 to 11.47   | No  | ns |
| HD 71 vs. HD 109  | -3.667 | -27.14 to 19.80   | No  | ns |

|                   |        |                 |    |    |
|-------------------|--------|-----------------|----|----|
| HD 71 vs. HD 180  | -7.333 | -30.80 to 16.14 | No | ns |
| HD 77 vs. HD 109  | 8.333  | -15.14 to 31.80 | No | ns |
| HD 77 vs. HD 180  | 4.667  | -18.80 to 28.14 | No | ns |
| HD 109 vs. HD 180 | -3.667 | -27.14 to 19.80 | No | ns |
| Day 28:           |        |                 |    |    |
| CTR 18 vs. CTR 21 | -1     | -18.99 to 16.99 | No | ns |
| CTR 18 vs. CTR 28 | 8.5    | -8.571 to 25.57 | No | ns |
| CTR 18 vs. CTR 33 | 3.5    | -14.49 to 21.49 | No | ns |
| CTR 18 vs. HD 60  | 8.25   | -9.744 to 26.24 | No | ns |
| CTR 18 vs. HD 71  | -4.5   | -22.49 to 13.49 | No | ns |
| CTR 18 vs. HD 77  | -0.5   | -18.49 to 17.49 | No | ns |
| CTR 18 vs. HD 109 | -1.9   | -18.97 to 15.17 | No | ns |
| CTR 18 vs. HD 180 | -2.5   | -18.93 to 13.93 | No | ns |
| CTR 21 vs. CTR 28 | 9.5    | -7.571 to 26.57 | No | ns |
| CTR 21 vs. CTR 33 | 4.5    | -13.49 to 22.49 | No | ns |
| CTR 21 vs. HD 60  | 9.25   | -8.744 to 27.24 | No | ns |
| CTR 21 vs. HD 71  | -3.5   | -21.49 to 14.49 | No | ns |
| CTR 21 vs. HD 77  | 0.5    | -17.49 to 18.49 | No | ns |
| CTR 21 vs. HD 109 | -0.9   | -17.97 to 16.17 | No | ns |
| CTR 21 vs. HD 180 | -1.5   | -17.93 to 14.93 | No | ns |
| CTR 28 vs. CTR 33 | -5     | -22.07 to 12.07 | No | ns |
| CTR 28 vs. HD 60  | -0.25  | -17.32 to 16.82 | No | ns |
| CTR 28 vs. HD 71  | -13    | -30.07 to 4.071 | No | ns |
| CTR 28 vs. HD 77  | -9     | -26.07 to 8.071 | No | ns |
| CTR 28 vs. HD 109 | -10.4  | -26.49 to 5.695 | No | ns |
| CTR 28 vs. HD 180 | -11    | -26.41 to 4.410 | No | ns |
| CTR 33 vs. HD 60  | 4.75   | -13.24 to 22.74 | No | ns |
| CTR 33 vs. HD 71  | -8     | -25.99 to 9.994 | No | ns |
| CTR 33 vs. HD 77  | -4     | -21.99 to 13.99 | No | ns |
| CTR 33 vs. HD 109 | -5.4   | -22.47 to 11.67 | No | ns |
| CTR 33 vs. HD 180 | -6     | -22.43 to 10.43 | No | ns |
| HD 60 vs. HD 71   | -12.75 | -30.74 to 5.244 | No | ns |
| HD 60 vs. HD 77   | -8.75  | -26.74 to 9.244 | No | ns |
| HD 60 vs. HD 109  | -10.15 | -27.22 to 6.921 | No | ns |
| HD 60 vs. HD 180  | -10.75 | -27.18 to 5.677 | No | ns |
| HD 71 vs. HD 77   | 4      | -13.99 to 21.99 | No | ns |
| HD 71 vs. HD 109  | 2.6    | -14.47 to 19.67 | No | ns |
| HD 71 vs. HD 180  | 2      | -14.43 to 18.43 | No | ns |
| HD 77 vs. HD 109  | -1.4   | -18.47 to 15.67 | No | ns |
| HD 77 vs. HD 180  | -2     | -18.43 to 14.43 | No | ns |
| HD 109 vs. HD 180 | -0.6   | -16.01 to 14.81 | No | ns |

|                   |  |         |                 |    |    |
|-------------------|--|---------|-----------------|----|----|
| Day 42            |  |         |                 |    |    |
| CTR 18 vs. CTR 21 |  | -2.292  | -6.935 to 2.351 | No | ns |
| CTR 18 vs. CTR 28 |  | 0.1649  | -4.478 to 4.808 | No | ns |
| CTR 18 vs. CTR 33 |  | -0.6899 | -5.333 to 3.953 | No | ns |
| CTR 18 vs. HD 60  |  | -0.393  | -6.680 to 5.894 | No | ns |
| CTR 18 vs. HD 71  |  | -3.186  | -7.829 to 1.458 | No | ns |
| CTR 18 vs. HD 77  |  | -3.452  | -8.095 to 1.191 | No | ns |
| CTR 18 vs. HD 109 |  | -2.591  | -7.606 to 2.424 | No | ns |
| CTR 18 vs. HD 180 |  | -2.257  | -7.551 to 3.037 | No | ns |
| CTR 21 vs. CTR 28 |  | 2.457   | -2.186 to 7.100 | No | ns |
| CTR 21 vs. CTR 33 |  | 1.602   | -3.041 to 6.245 | No | ns |
| CTR 21 vs. HD 60  |  | 1.899   | -4.388 to 8.186 | No | ns |
| CTR 21 vs. HD 71  |  | -0.8934 | -5.536 to 3.750 | No | ns |
| CTR 21 vs. HD 77  |  | -1.16   | -5.803 to 3.483 | No | ns |
| CTR 21 vs. HD 109 |  | -0.2989 | -5.314 to 4.716 | No | ns |
| CTR 21 vs. HD 180 |  | 0.03541 | -5.258 to 5.329 | No | ns |
| CTR 28 vs. CTR 33 |  | -0.8547 | -5.498 to 3.788 | No | ns |
| CTR 28 vs. HD 60  |  | -0.5578 | -6.845 to 5.729 | No | ns |
| CTR 28 vs. HD 71  |  | -3.35   | -7.993 to 1.293 | No | ns |
| CTR 28 vs. HD 77  |  | -3.617  | -8.260 to 1.026 | No | ns |
| CTR 28 vs. HD 109 |  | -2.756  | -7.771 to 2.259 | No | ns |
| CTR 28 vs. HD 180 |  | -2.422  | -7.715 to 2.872 | No | ns |
| CTR 33 vs. HD 60  |  | 0.2969  | -5.990 to 6.584 | No | ns |
| CTR 33 vs. HD 71  |  | -2.496  | -7.139 to 2.147 | No | ns |
| CTR 33 vs. HD 77  |  | -2.762  | -7.405 to 1.881 | No | ns |
| CTR 33 vs. HD 109 |  | -1.901  | -6.916 to 3.114 | No | ns |
| CTR 33 vs. HD 180 |  | -1.567  | -6.861 to 3.727 | No | ns |
| HD 60 vs. HD 71   |  | -2.793  | -9.079 to 3.494 | No | ns |
| HD 60 vs. HD 77   |  | -3.059  | -9.346 to 3.228 | No | ns |
| HD 60 vs. HD 109  |  | -2.198  | -8.764 to 4.368 | No | ns |
| HD 60 vs. HD 180  |  | -1.864  | -8.645 to 4.918 | No | ns |
| HD 71 vs. HD 77   |  | -0.2663 | -4.909 to 4.377 | No | ns |
| HD 71 vs. HD 109  |  | 0.5945  | -4.421 to 5.610 | No | ns |
| HD 71 vs. HD 180  |  | 0.9288  | -4.365 to 6.223 | No | ns |
| HD 77 vs. HD 109  |  | 0.8608  | -4.154 to 5.876 | No | ns |
| HD 77 vs. HD 180  |  | 1.195   | -4.099 to 6.489 | No | ns |
| HD 109 vs. HD 180 |  | 0.3343  | -5.289 to 5.957 | No | ns |
|                   |  |         |                 |    |    |
| Day 56            |  |         |                 |    |    |
| CTR 18 vs. CTR 21 |  | 0.8159  | -18.96 to 20.59 | No | ns |
| CTR 18 vs. CTR 28 |  | -3.151  | -24.12 to 17.82 | No | ns |
| CTR 18 vs. CTR 33 |  | 5.88    | -12.43 to 24.19 | No | ns |
| CTR 18 vs. HD 60  |  | 9.209   | -11.77 to 30.18 | No | ns |



|                   |  |         |                 |     |    |
|-------------------|--|---------|-----------------|-----|----|
| CTR 18 vs. HD 71  |  | 3.953   | -14.98 to 22.89 | No  | ns |
| CTR 18 vs. HD 77  |  | 7.182   | -11.13 to 25.49 | No  | ns |
| CTR 18 vs. HD 109 |  | 5.956   | -12.35 to 24.26 | No  | ns |
| CTR 18 vs. HD 180 |  | 16.28   | -4.697 to 37.25 | No  | ns |
| CTR 21 vs. CTR 28 |  | -3.967  | -24.94 to 17.01 | No  | ns |
| CTR 21 vs. CTR 33 |  | 5.064   | -13.24 to 23.37 | No  | ns |
| CTR 21 vs. HD 60  |  | 8.393   | -12.58 to 29.37 | No  | ns |
| CTR 21 vs. HD 71  |  | 3.137   | -15.80 to 22.07 | No  | ns |
| CTR 21 vs. HD 77  |  | 6.366   | -11.94 to 24.67 | No  | ns |
| CTR 21 vs. HD 109 |  | 5.14    | -13.17 to 23.45 | No  | ns |
| CTR 21 vs. HD 180 |  | 15.46   | -5.513 to 36.43 | No  | ns |
| CTR 28 vs. CTR 33 |  | 9.031   | -10.57 to 28.63 | No  | ns |
| CTR 28 vs. HD 60  |  | 12.36   | -9.749 to 34.47 | No  | ns |
| CTR 28 vs. HD 71  |  | 7.104   | -13.08 to 27.29 | No  | ns |
| CTR 28 vs. HD 77  |  | 10.33   | -9.264 to 29.93 | No  | ns |
| CTR 28 vs. HD 109 |  | 9.107   | -10.49 to 28.70 | No  | ns |
| CTR 28 vs. HD 180 |  | 19.43   | -2.681 to 41.54 | No  | ns |
| CTR 33 vs. HD 60  |  | 3.329   | -16.27 to 22.93 | No  | ns |
| CTR 33 vs. HD 71  |  | -1.927  | -19.32 to 15.47 | No  | ns |
| CTR 33 vs. HD 77  |  | 1.302   | -15.41 to 18.01 | No  | ns |
| CTR 33 vs. HD 109 |  | 0.07625 | -16.64 to 16.79 | No  | ns |
| CTR 33 vs. HD 180 |  | 10.4    | -9.200 to 29.99 | No  | ns |
| HD 60 vs. HD 71   |  | -5.256  | -25.44 to 14.93 | No  | ns |
| HD 60 vs. HD 77   |  | -2.027  | -21.62 to 17.57 | No  | ns |
| HD 60 vs. HD 109  |  | -3.253  | -22.85 to 16.34 | No  | ns |
| HD 60 vs. HD 180  |  | 7.068   | -15.04 to 29.18 | No  | ns |
| HD 71 vs. HD 77   |  | 3.229   | -14.17 to 20.62 | No  | ns |
| HD 71 vs. HD 109  |  | 2.003   | -15.39 to 19.40 | No  | ns |
| HD 71 vs. HD 180  |  | 12.32   | -7.859 to 32.51 | No  | ns |
| HD 77 vs. HD 109  |  | -1.226  | -17.94 to 15.49 | No  | ns |
| HD 77 vs. HD 180  |  | 9.095   | -10.50 to 28.69 | No  | ns |
| HD 109 vs. HD 180 |  | 10.32   | -9.277 to 29.92 | No  | ns |
|                   |  |         |                 |     |    |
| Day 80            |  |         |                 |     |    |
| CTR 18 vs. CTR 21 |  | -0.2547 | -17.15 to 16.64 | No  | ns |
| CTR 18 vs. CTR 28 |  | -0.4551 | -18.96 to 18.05 | No  | ns |
| CTR 18 vs. CTR 33 |  | 0.2429  | -16.65 to 17.14 | No  | ns |
| CTR 18 vs. HD 60  |  | 24      | 7.111 to 40.90  | Yes | ** |
| CTR 18 vs. HD 71  |  | -1.141  | -18.03 to 15.75 | No  | ns |
| CTR 18 vs. HD 77  |  | 1.498   | -15.40 to 18.39 | No  | ns |
| CTR 18 vs. HD 109 |  | -1.158  | -18.05 to 15.74 | No  | ns |
| CTR 18 vs. HD 180 |  | 10.01   | -6.881 to 26.91 | No  | ns |
| CTR 21 vs. CTR 28 |  | -0.2004 | -17.09 to 16.69 | No  | ns |

|                                                               |  |            |                   |              |         |
|---------------------------------------------------------------|--|------------|-------------------|--------------|---------|
| CTR 21 vs. CTR 33                                             |  | 0.4975     | -14.61 to 15.61   | No           | ns      |
| CTR 21 vs. HD 60                                              |  | 24.26      | 9.149 to 39.37    | Yes          | ***     |
| CTR 21 vs. HD 71                                              |  | -0.8863    | -16.00 to 14.22   | No           | ns      |
| CTR 21 vs. HD 77                                              |  | 1.753      | -13.36 to 16.86   | No           | ns      |
| CTR 21 vs. HD 109                                             |  | -0.9038    | -16.01 to 14.21   | No           | ns      |
| CTR 21 vs. HD 180                                             |  | 10.27      | -4.843 to 25.38   | No           | ns      |
| CTR 28 vs. CTR 33                                             |  | 0.6979     | -16.20 to 17.59   | No           | ns      |
| CTR 28 vs. HD 60                                              |  | 24.46      | 7.566 to 41.35    | Yes          | **      |
| CTR 28 vs. HD 71                                              |  | -0.686     | -17.58 to 16.21   | No           | ns      |
| CTR 28 vs. HD 77                                              |  | 1.953      | -14.94 to 18.85   | No           | ns      |
| CTR 28 vs. HD 109                                             |  | -0.7034    | -17.60 to 16.19   | No           | ns      |
| CTR 28 vs. HD 180                                             |  | 10.47      | -6.426 to 27.36   | No           | ns      |
| CTR 33 vs. HD 60                                              |  | 23.76      | 8.651 to 38.87    | Yes          | ***     |
| CTR 33 vs. HD 71                                              |  | -1.384     | -16.49 to 13.73   | No           | ns      |
| CTR 33 vs. HD 77                                              |  | 1.255      | -13.85 to 16.37   | No           | ns      |
| CTR 33 vs. HD 109                                             |  | -1.401     | -16.51 to 13.71   | No           | ns      |
| CTR 33 vs. HD 180                                             |  | 9.77       | -5.341 to 24.88   | No           | ns      |
| HD 60 vs. HD 71                                               |  | -25.15     | -40.26 to -10.04  | Yes          | ***     |
| HD 60 vs. HD 77                                               |  | -22.51     | -37.62 to -7.396  | Yes          | **      |
| HD 60 vs. HD 109                                              |  | -25.16     | -40.27 to -10.05  | Yes          | ***     |
| HD 60 vs. HD 180                                              |  | -13.99     | -29.10 to 1.118   | No           | ns      |
| HD 71 vs. HD 77                                               |  | 2.639      | -12.47 to 17.75   | No           | ns      |
| HD 71 vs. HD 109                                              |  | -0.01745   | -15.13 to 15.09   | No           | ns      |
| HD 71 vs. HD 180                                              |  | 11.15      | -3.957 to 26.26   | No           | ns      |
| HD 77 vs. HD 109                                              |  | -2.657     | -17.77 to 12.45   | No           | ns      |
| HD 77 vs. HD 180                                              |  | 8.514      | -6.596 to 23.62   | No           | ns      |
| HD 109 vs. HD 180                                             |  | 11.17      | -3.939 to 26.28   | No           | ns      |
| <b>One-way ANOVA (between time points, within cell lines)</b> |  |            |                   |              |         |
| Bonferroni's multiple comparisons test                        |  | Mean Diff. | 95% CI of diff.   | Significant? | Summary |
| <b>CTR 18:</b>                                                |  |            |                   |              |         |
| Day 0 vs. Day 7                                               |  | -1.667     | -19.94 to 16.60   | No           | ns      |
| Day 0 vs. Day 14                                              |  | -10.67     | -28.94 to 7.605   | No           | ns      |
| Day 0 vs. Day 28                                              |  | -7.167     | -24.26 to 9.925   | No           | ns      |
| Day 0 vs. Day 42                                              |  | -9.602     | -24.75 to 5.548   | No           | ns      |
| Day 0 vs. Day 56                                              |  | -18.61     | -34.95 to -2.269  | Yes          | *       |
| Day 0 vs. Day 80                                              |  | -22.67     | -43.10 to -2.243  | Yes          | *       |
| Day 7 vs. Day 14                                              |  | -9         | -27.27 to 9.271   | No           | ns      |
| Day 7 vs. Day 28                                              |  | -5.5       | -22.59 to 11.59   | No           | ns      |
| Day 7 vs. Day 42                                              |  | -7.935     | -23.09 to 7.215   | No           | ns      |
| Day 7 vs. Day 56                                              |  | -16.95     | -33.29 to -0.6028 | Yes          | *       |
| Day 7 vs. Day 80                                              |  | -21        | -41.43 to -0.5761 | Yes          | *       |

|                   |        |                   |     |      |
|-------------------|--------|-------------------|-----|------|
| Day 14 vs. Day 28 | 3.5    | -13.59 to 20.59   | No  | ns   |
| Day 14 vs. Day 42 | 1.065  | -14.09 to 16.21   | No  | ns   |
| Day 14 vs. Day 56 | -7.945 | -24.29 to 8.397   | No  | ns   |
| Day 14 vs. Day 80 | -12    | -32.43 to 8.424   | No  | ns   |
| Day 28 vs. Day 42 | -2.435 | -16.14 to 11.27   | No  | ns   |
| Day 28 vs. Day 56 | -11.45 | -26.46 to 3.566   | No  | ns   |
| Day 28 vs. Day 80 | -15.5  | -34.88 to 3.876   | No  | ns   |
| Day 42 vs. Day 56 | -9.01  | -21.77 to 3.747   | No  | ns   |
| Day 42 vs. Day 80 | -13.07 | -30.76 to 4.622   | No  | ns   |
| Day 56 vs. Day 80 | -4.059 | -22.78 to 14.66   | No  | ns   |
| CTR 21:           |        |                   |     |      |
| Day 0 vs. Day 7   | -5.333 | -23.76 to 13.10   | No  | ns   |
| Day 0 vs. Day 14  | -20    | -38.43 to -1.569  | Yes | *    |
| Day 0 vs. Day 28  | -9.167 | -26.41 to 8.074   | No  | ns   |
| Day 0 vs. Day 42  | -12.89 | -28.18 to 2.388   | No  | ns   |
| Day 0 vs. Day 56  | -18.8  | -35.28 to -2.311  | Yes | *    |
| Day 0 vs. Day 80  | -23.93 | -42.36 to -5.494  | Yes | **   |
| Day 7 vs. Day 14  | -14.67 | -33.10 to 3.764   | No  | ns   |
| Day 7 vs. Day 28  | -3.833 | -21.07 to 13.41   | No  | ns   |
| Day 7 vs. Day 42  | -7.561 | -22.84 to 7.722   | No  | ns   |
| Day 7 vs. Day 56  | -13.46 | -29.95 to 3.023   | No  | ns   |
| Day 7 vs. Day 80  | -18.59 | -37.02 to -0.1611 | Yes | *    |
| Day 14 vs. Day 28 | 10.83  | -6.407 to 28.07   | No  | ns   |
| Day 14 vs. Day 42 | 7.106  | -8.176 to 22.39   | No  | ns   |
| Day 14 vs. Day 56 | 1.204  | -15.28 to 17.69   | No  | ns   |
| Day 14 vs. Day 80 | -3.926 | -22.36 to 14.51   | No  | ns   |
| Day 28 vs. Day 42 | -3.727 | -17.55 to 10.10   | No  | ns   |
| Day 28 vs. Day 56 | -9.629 | -24.77 to 5.513   | No  | ns   |
| Day 28 vs. Day 80 | -14.76 | -32.00 to 2.482   | No  | ns   |
| Day 42 vs. Day 56 | -5.902 | -18.77 to 6.967   | No  | ns   |
| Day 42 vs. Day 80 | -11.03 | -26.31 to 4.251   | No  | ns   |
| Day 56 vs. Day 80 | -5.13  | -21.61 to 11.36   | No  | ns   |
| CTR 28:           |        |                   |     |      |
| Day 0 vs. Day 7   | 0      | -7.056 to 7.056   | No  | ns   |
| Day 0 vs. Day 14  | -1     | -7.311 to 5.311   | No  | ns   |
| Day 0 vs. Day 28  | 0      | -5.645 to 5.645   | No  | ns   |
| Day 0 vs. Day 42  | -10.77 | -16.00 to -5.537  | Yes | **** |
| Day 0 vs. Day 56  | -23.1  | -29.00 to -17.19  | Yes | **** |
| Day 0 vs. Day 80  | -24.46 | -31.52 to -17.40  | Yes | **** |
| Day 7 vs. Day 14  | -1     | -8.056 to 6.056   | No  | ns   |
| Day 7 vs. Day 28  | 0      | -6.467 to 6.467   | No  | ns   |

|                   |  |        |                  |     |      |
|-------------------|--|--------|------------------|-----|------|
| Day 7 vs. Day 42  |  | -10.77 | -16.88 to -4.660 | Yes | ***  |
| Day 7 vs. Day 56  |  | -23.1  | -29.79 to -16.40 | Yes | **** |
| Day 7 vs. Day 80  |  | -24.46 | -32.19 to -16.73 | Yes | **** |
| Day 14 vs. Day 28 |  | 1      | -4.645 to 6.645  | No  | ns   |
| Day 14 vs. Day 42 |  | -9.77  | -15.00 to -4.537 | Yes | **** |
| Day 14 vs. Day 56 |  | -22.1  | -28.00 to -16.19 | Yes | **** |
| Day 14 vs. Day 80 |  | -23.46 | -30.52 to -16.40 | Yes | **** |
| Day 28 vs. Day 42 |  | -10.77 | -15.18 to -6.364 | Yes | **** |
| Day 28 vs. Day 56 |  | -23.1  | -28.28 to -17.91 | Yes | **** |
| Day 28 vs. Day 80 |  | -24.46 | -30.93 to -17.99 | Yes | **** |
| Day 42 vs. Day 56 |  | -12.33 | -17.06 to -7.592 | Yes | **** |
| Day 42 vs. Day 80 |  | -13.69 | -19.80 to -7.578 | Yes | **** |
| Day 56 vs. Day 80 |  | -1.363 | -8.057 to 5.331  | No  | ns   |
| <b>CTR 33:</b>    |  |        |                  |     |      |
| Day 0 vs. Day 7   |  | -2     | -21.98 to 17.98  | No  | ns   |
| Day 0 vs. Day 14  |  | -6.667 | -24.53 to 11.20  | No  | ns   |
| Day 0 vs. Day 28  |  | -5     | -21.71 to 11.71  | No  | ns   |
| Day 0 vs. Day 42  |  | -11.63 | -26.44 to 3.190  | No  | ns   |
| Day 0 vs. Day 56  |  | -14.07 | -29.17 to 1.036  | No  | ns   |
| Day 0 vs. Day 80  |  | -23.76 | -41.63 to -5.894 | Yes | **   |
| Day 7 vs. Day 14  |  | -4.667 | -24.64 to 15.31  | No  | ns   |
| Day 7 vs. Day 28  |  | -3     | -21.95 to 15.95  | No  | ns   |
| Day 7 vs. Day 42  |  | -9.625 | -26.93 to 7.675  | No  | ns   |
| Day 7 vs. Day 56  |  | -12.07 | -29.61 to 5.481  | No  | ns   |
| Day 7 vs. Day 80  |  | -21.76 | -41.74 to -1.785 | Yes | *    |
| Day 14 vs. Day 28 |  | 1.667  | -15.05 to 18.38  | No  | ns   |
| Day 14 vs. Day 42 |  | -4.958 | -19.77 to 9.857  | No  | ns   |
| Day 14 vs. Day 56 |  | -7.399 | -22.50 to 7.702  | No  | ns   |
| Day 14 vs. Day 80 |  | -17.09 | -34.96 to 0.7731 | No  | ns   |
| Day 28 vs. Day 42 |  | -6.625 | -20.03 to 6.776  | No  | ns   |
| Day 28 vs. Day 56 |  | -9.065 | -22.78 to 4.651  | No  | ns   |
| Day 28 vs. Day 80 |  | -18.76 | -35.48 to -2.048 | Yes | *    |
| Day 42 vs. Day 56 |  | -2.44  | -13.77 to 8.886  | No  | ns   |
| Day 42 vs. Day 80 |  | -12.14 | -26.95 to 2.679  | No  | ns   |
| Day 56 vs. Day 80 |  | -9.696 | -24.80 to 5.405  | No  | ns   |
| <b>HD 60:</b>     |  |        |                  |     |      |
| Day 0 vs. Day 7   |  | -4     | -10.11 to 2.112  | No  | ns   |
| Day 0 vs. Day 14  |  | -8.667 | -14.78 to -2.554 | Yes | **   |
| Day 0 vs. Day 28  |  | 0.75   | -4.968 to 6.468  | No  | ns   |
| Day 0 vs. Day 42  |  | -10.33 | -16.44 to -4.216 | Yes | ***  |
| Day 0 vs. Day 56  |  | -9.736 | -15.45 to -4.019 | Yes | ***  |

|                   |         |                    |     |      |
|-------------------|---------|--------------------|-----|------|
| Day 7 vs. Day 14  | -4.667  | -10.78 to 1.446    | No  | ns   |
| Day 7 vs. Day 28  | 4.75    | -0.9677 to 10.47   | No  | ns   |
| Day 7 vs. Day 42  | -6.328  | -12.44 to -0.2158  | Yes | *    |
| Day 7 vs. Day 56  | -5.736  | -11.45 to -0.01865 | Yes | *    |
| Day 14 vs. Day 28 | 9.417   | 3.699 to 15.13     | Yes | ***  |
| Day 14 vs. Day 42 | -1.662  | -7.774 to 4.451    | No  | ns   |
| Day 14 vs. Day 56 | -1.07   | -6.787 to 4.648    | No  | ns   |
| Day 28 vs. Day 42 | -11.08  | -16.80 to -5.361   | Yes | ***  |
| Day 28 vs. Day 56 | -10.49  | -15.78 to -5.193   | Yes | **** |
| Day 42 vs. Day 56 | 0.5919  | -5.126 to 6.310    | No  | ns   |
| HD 71:            |         |                    |     |      |
| Day 0 vs. Day 7   | -0.6667 | -17.85 to 16.51    | No  | ns   |
| Day 0 vs. Day 14  | -4.667  | -21.85 to 12.51    | No  | ns   |
| Day 0 vs. Day 28  | -13     | -29.07 to 3.071    | No  | ns   |
| Day 0 vs. Day 42  | -14.12  | -28.37 to 0.1248   | No  | ns   |
| Day 0 vs. Day 56  | -15.99  | -30.87 to -1.113   | Yes | *    |
| Day 0 vs. Day 80  | -25.15  | -42.33 to -7.964   | Yes | ***  |
| Day 7 vs. Day 14  | -4      | -21.18 to 13.18    | No  | ns   |
| Day 7 vs. Day 28  | -12.33  | -28.40 to 3.738    | No  | ns   |
| Day 7 vs. Day 42  | -13.45  | -27.70 to 0.7915   | No  | ns   |
| Day 7 vs. Day 56  | -15.33  | -30.20 to -0.4463  | Yes | *    |
| Day 7 vs. Day 80  | -24.48  | -41.66 to -7.298   | Yes | **   |
| Day 14 vs. Day 28 | -8.333  | -24.40 to 7.738    | No  | ns   |
| Day 14 vs. Day 42 | -9.454  | -23.70 to 4.791    | No  | ns   |
| Day 14 vs. Day 56 | -11.33  | -26.20 to 3.554    | No  | ns   |
| Day 14 vs. Day 80 | -20.48  | -37.66 to -3.298   | Yes | **   |
| Day 28 vs. Day 42 | -1.121  | -14.01 to 11.76    | No  | ns   |
| Day 28 vs. Day 56 | -2.992  | -16.57 to 10.59    | No  | ns   |
| Day 28 vs. Day 80 | -12.15  | -28.22 to 3.926    | No  | ns   |
| Day 42 vs. Day 56 | -1.871  | -13.24 to 9.493    | No  | ns   |
| Day 42 vs. Day 80 | -11.02  | -25.27 to 3.221    | No  | ns   |
| Day 56 vs. Day 80 | -9.153  | -24.03 to 5.726    | No  | ns   |
| HD 77:            |         |                    |     |      |
| Day 0 vs. Day 7   | -12.33  | -30.17 to 5.508    | No  | ns   |
| Day 0 vs. Day 14  | -16.33  | -34.17 to 1.508    | No  | ns   |
| Day 0 vs. Day 28  | -8.667  | -25.36 to 8.022    | No  | ns   |
| Day 0 vs. Day 42  | -14.05  | -28.85 to 0.7394   | No  | ns   |
| Day 0 vs. Day 56  | -12.43  | -27.51 to 2.649    | No  | ns   |
| Day 0 vs. Day 80  | -22.17  | -40.01 to -4.332   | Yes | **   |
| Day 7 vs. Day 14  | -4      | -21.84 to 13.84    | No  | ns   |
| Day 7 vs. Day 28  | 3.667   | -13.02 to 20.36    | No  | ns   |

|                   |         |                  |     |    |
|-------------------|---------|------------------|-----|----|
| Day 7 vs. Day 42  | -1.72   | -16.51 to 13.07  | No  | ns |
| Day 7 vs. Day 56  | -0.0966 | -15.18 to 14.98  | No  | ns |
| Day 7 vs. Day 80  | -9.839  | -27.68 to 8.002  | No  | ns |
| Day 14 vs. Day 28 | 7.667   | -9.022 to 24.36  | No  | ns |
| Day 14 vs. Day 42 | 2.28    | -12.51 to 17.07  | No  | ns |
| Day 14 vs. Day 56 | 3.903   | -11.18 to 18.98  | No  | ns |
| Day 14 vs. Day 80 | -5.839  | -23.68 to 12.00  | No  | ns |
| Day 28 vs. Day 42 | -5.387  | -18.77 to 7.994  | No  | ns |
| Day 28 vs. Day 56 | -3.763  | -17.46 to 9.932  | No  | ns |
| Day 28 vs. Day 80 | -13.51  | -30.20 to 3.183  | No  | ns |
| Day 42 vs. Day 56 | 1.624   | -9.685 to 12.93  | No  | ns |
| Day 42 vs. Day 80 | -8.119  | -22.91 to 6.674  | No  | ns |
| Day 56 vs. Day 80 | -9.743  | -24.82 to 5.336  | No  | ns |
| HD 109:           |         |                  |     |    |
| Day 0 vs. Day 7   | 1.333   | -15.68 to 18.35  | No  | ns |
| Day 0 vs. Day 14  | -6.333  | -23.35 to 10.68  | No  | ns |
| Day 0 vs. Day 28  | -8.4    | -23.62 to 6.820  | No  | ns |
| Day 0 vs. Day 42  | -11.53  | -26.26 to 3.210  | No  | ns |
| Day 0 vs. Day 56  | -11.99  | -26.37 to 2.392  | No  | ns |
| Day 0 vs. Day 80  | -23.16  | -40.18 to -6.147 | Yes | ** |
| Day 7 vs. Day 14  | -7.667  | -24.68 to 9.349  | No  | ns |
| Day 7 vs. Day 28  | -9.733  | -24.95 to 5.486  | No  | ns |
| Day 7 vs. Day 42  | -12.86  | -27.60 to 1.877  | No  | ns |
| Day 7 vs. Day 56  | -13.32  | -27.70 to 1.059  | No  | ns |
| Day 7 vs. Day 80  | -24.5   | -41.51 to -7.480 | Yes | ** |
| Day 14 vs. Day 28 | -2.067  | -17.29 to 13.15  | No  | ns |
| Day 14 vs. Day 42 | -5.193  | -19.93 to 9.543  | No  | ns |
| Day 14 vs. Day 56 | -5.656  | -20.04 to 8.726  | No  | ns |
| Day 14 vs. Day 80 | -16.83  | -33.85 to 0.1868 | No  | ns |
| Day 28 vs. Day 42 | -3.126  | -15.75 to 9.493  | No  | ns |
| Day 28 vs. Day 56 | -3.589  | -15.79 to 8.614  | No  | ns |
| Day 28 vs. Day 80 | -14.76  | -29.98 to 0.4570 | No  | ns |
| Day 42 vs. Day 56 | -0.4626 | -12.06 to 11.13  | No  | ns |
| Day 42 vs. Day 80 | -11.64  | -26.37 to 3.100  | No  | ns |
| Day 56 vs. Day 80 | -11.17  | -25.55 to 3.208  | No  | ns |
| HD 180:           |         |                  |     |    |
| Day 0 vs. Day 7   | -4.333  | -27.50 to 18.83  | No  | ns |
| Day 0 vs. Day 14  | -11.33  | -34.50 to 11.83  | No  | ns |
| Day 0 vs. Day 28  | -10.33  | -30.40 to 9.730  | No  | ns |
| Day 0 vs. Day 42  | -12.53  | -33.25 to 8.196  | No  | ns |
| Day 0 vs. Day 56  | -3.002  | -24.67 to 18.67  | No  | ns |

|                   |         |                 |    |    |
|-------------------|---------|-----------------|----|----|
| Day 0 vs. Day 80  | -13.33  | -36.49 to 9.842 | No | ns |
| Day 7 vs. Day 14  | -7      | -30.17 to 16.17 | No | ns |
| Day 7 vs. Day 28  | -6      | -26.06 to 14.06 | No | ns |
| Day 7 vs. Day 42  | -8.192  | -28.91 to 12.53 | No | ns |
| Day 7 vs. Day 56  | 1.331   | -20.34 to 23.00 | No | ns |
| Day 7 vs. Day 80  | -8.992  | -32.16 to 14.18 | No | ns |
| Day 14 vs. Day 28 | 1       | -19.06 to 21.06 | No | ns |
| Day 14 vs. Day 42 | -1.192  | -21.91 to 19.53 | No | ns |
| Day 14 vs. Day 56 | 8.331   | -13.34 to 30.00 | No | ns |
| Day 14 vs. Day 80 | -1.992  | -25.16 to 21.18 | No | ns |
| Day 28 vs. Day 42 | -2.192  | -19.37 to 14.99 | No | ns |
| Day 28 vs. Day 56 | 7.331   | -10.98 to 25.65 | No | ns |
| Day 28 vs. Day 80 | -2.992  | -23.06 to 17.07 | No | ns |
| Day 42 vs. Day 56 | 9.523   | -9.511 to 28.56 | No | ns |
| Day 42 vs. Day 80 | -0.7998 | -21.52 to 19.92 | No | ns |
| Day 56 vs. Day 80 | -10.32  | -31.99 to 11.35 | No | ns |

**GFAP**

| <b>Two-way ANOVA</b> |                      |          |                 |              |
|----------------------|----------------------|----------|-----------------|--------------|
| Source of Variation  | % of total variation | P value  | P value summary | Significant? |
| Interaction          | 26.96                | < 0.0001 | ****            | Yes          |
| Row Factor           | 7.938                | < 0.0001 | ****            | Yes          |
| Column Factor        | 21.71                | < 0.0001 | ****            | Yes          |

| <b>One-way ANOVA (between cell lines, within time point)</b> |            |                 |              |         |
|--------------------------------------------------------------|------------|-----------------|--------------|---------|
| Bonferroni's multiple comparisons test                       | Mean Diff. | 95% CI of diff. | Significant? | Summary |
| Day 0:                                                       |            |                 |              |         |
| CTR 18 vs. CTR 21                                            | 2.333      | -21.80 to 26.47 | No           | ns      |
| CTR 18 vs. CTR 28                                            | -2.333     | -26.47 to 21.80 | No           | ns      |
| CTR 18 vs. CTR 33                                            | 2.667      | -21.47 to 26.80 | No           | ns      |
| CTR 18 vs. HD 60                                             | -7.333     | -31.47 to 16.80 | No           | ns      |
| CTR 18 vs. HD 71                                             | 6          | -18.13 to 30.13 | No           | ns      |
| CTR 18 vs. HD 77                                             | 7.333      | -16.80 to 31.47 | No           | ns      |
| CTR 18 vs. HD 109                                            | -1         | -25.13 to 23.13 | No           | ns      |
| CTR 18 vs. HD 180                                            | 0.3333     | -23.80 to 24.47 | No           | ns      |
| CTR 21 vs. CTR 28                                            | -4.667     | -28.80 to 19.47 | No           | ns      |
| CTR 21 vs. CTR 33                                            | 0.3333     | -23.80 to 24.47 | No           | ns      |
| CTR 21 vs. HD 60                                             | -9.667     | -33.80 to 14.47 | No           | ns      |
| CTR 21 vs. HD 71                                             | 3.667      | -20.47 to 27.80 | No           | ns      |
| CTR 21 vs. HD 77                                             | 5          | -19.13 to 29.13 | No           | ns      |
| CTR 21 vs. HD 109                                            | -3.333     | -27.47 to 20.80 | No           | ns      |
| CTR 21 vs. HD 180                                            | -2         | -26.13 to 22.13 | No           | ns      |

|                   |         |                  |     |    |
|-------------------|---------|------------------|-----|----|
| CTR 28 vs. CTR 33 | 5       | -19.13 to 29.13  | No  | ns |
| CTR 28 vs. HD 60  | -5      | -29.13 to 19.13  | No  | ns |
| CTR 28 vs. HD 71  | 8.333   | -15.80 to 32.47  | No  | ns |
| CTR 28 vs. HD 77  | 9.667   | -14.47 to 33.80  | No  | ns |
| CTR 28 vs. HD 109 | 1.333   | -22.80 to 25.47  | No  | ns |
| CTR 28 vs. HD 180 | 2.667   | -21.47 to 26.80  | No  | ns |
| CTR 33 vs. HD 60  | -10     | -34.13 to 14.13  | No  | ns |
| CTR 33 vs. HD 71  | 3.333   | -20.80 to 27.47  | No  | ns |
| CTR 33 vs. HD 77  | 4.667   | -19.47 to 28.80  | No  | ns |
| CTR 33 vs. HD 109 | -3.667  | -27.80 to 20.47  | No  | ns |
| CTR 33 vs. HD 180 | -2.333  | -26.47 to 21.80  | No  | ns |
| HD 60 vs. HD 71   | 13.33   | -10.80 to 37.47  | No  | ns |
| HD 60 vs. HD 77   | 14.67   | -9.467 to 38.80  | No  | ns |
| HD 60 vs. HD 109  | 6.333   | -17.80 to 30.47  | No  | ns |
| HD 60 vs. HD 180  | 7.667   | -16.47 to 31.80  | No  | ns |
| HD 71 vs. HD 77   | 1.333   | -22.80 to 25.47  | No  | ns |
| HD 71 vs. HD 109  | -7      | -31.13 to 17.13  | No  | ns |
| HD 71 vs. HD 180  | -5.667  | -29.80 to 18.47  | No  | ns |
| HD 77 vs. HD 109  | -8.333  | -32.47 to 15.80  | No  | ns |
| HD 77 vs. HD 180  | -7      | -31.13 to 17.13  | No  | ns |
| HD 109 vs. HD 180 | 1.333   | -22.80 to 25.47  | No  | ns |
| Day 7:            |         |                  |     |    |
| CTR 18 vs. CTR 21 | 8.667   | -4.648 to 21.98  | No  | ns |
| CTR 18 vs. CTR 28 | 9       | -4.314 to 22.31  | No  | ns |
| CTR 18 vs. CTR 33 | 8.667   | -4.648 to 21.98  | No  | ns |
| CTR 18 vs. HD 60  | -8.667  | -21.98 to 4.648  | No  | ns |
| CTR 18 vs. HD 71  | 10      | -3.314 to 23.31  | No  | ns |
| CTR 18 vs. HD 77  | 10.33   | -2.981 to 23.65  | No  | ns |
| CTR 18 vs. HD 109 | 1.667   | -11.65 to 14.98  | No  | ns |
| CTR 18 vs. HD 180 | 9.333   | -3.981 to 22.65  | No  | ns |
| CTR 21 vs. CTR 28 | 0.3333  | -12.98 to 13.65  | No  | ns |
| CTR 21 vs. CTR 33 | 0       | -13.31 to 13.31  | No  | ns |
| CTR 21 vs. HD 60  | -17.33  | -30.65 to -4.019 | Yes | ** |
| CTR 21 vs. HD 71  | 1.333   | -11.98 to 14.65  | No  | ns |
| CTR 21 vs. HD 77  | 1.667   | -11.65 to 14.98  | No  | ns |
| CTR 21 vs. HD 109 | -7      | -20.31 to 6.314  | No  | ns |
| CTR 21 vs. HD 180 | 0.6667  | -12.65 to 13.98  | No  | ns |
| CTR 28 vs. CTR 33 | -0.3333 | -13.65 to 12.98  | No  | ns |
| CTR 28 vs. HD 60  | -17.67  | -30.98 to -4.352 | Yes | ** |
| CTR 28 vs. HD 71  | 1       | -12.31 to 14.31  | No  | ns |
| CTR 28 vs. HD 77  | 1.333   | -11.98 to 14.65  | No  | ns |
| CTR 28 vs. HD 109 | -7.333  | -20.65 to 5.981  | No  | ns |



|                   |         |                   |     |    |
|-------------------|---------|-------------------|-----|----|
| CTR 28 vs. HD 180 | 0.3333  | -12.98 to 13.65   | No  | ns |
| CTR 33 vs. HD 60  | -17.33  | -30.65 to -4.019  | Yes | ** |
| CTR 33 vs. HD 71  | 1.333   | -11.98 to 14.65   | No  | ns |
| CTR 33 vs. HD 77  | 1.667   | -11.65 to 14.98   | No  | ns |
| CTR 33 vs. HD 109 | -7      | -20.31 to 6.314   | No  | ns |
| CTR 33 vs. HD 180 | 0.6667  | -12.65 to 13.98   | No  | ns |
| HD 60 vs. HD 71   | 18.67   | 5.352 to 31.98    | Yes | ** |
| HD 60 vs. HD 77   | 19      | 5.686 to 32.31    | Yes | ** |
| HD 60 vs. HD 109  | 10.33   | -2.981 to 23.65   | No  | ns |
| HD 60 vs. HD 180  | 18      | 4.686 to 31.31    | Yes | ** |
| HD 71 vs. HD 77   | 0.3333  | -12.98 to 13.65   | No  | ns |
| HD 71 vs. HD 109  | -8.333  | -21.65 to 4.981   | No  | ns |
| HD 71 vs. HD 180  | -0.6667 | -13.98 to 12.65   | No  | ns |
| HD 77 vs. HD 109  | -8.667  | -21.98 to 4.648   | No  | ns |
| HD 77 vs. HD 180  | -1      | -14.31 to 12.31   | No  | ns |
| HD 109 vs. HD 180 | 7.667   | -5.648 to 20.98   | No  | ns |
| Day 14:           |         |                   |     |    |
| CTR 18 vs. CTR 21 | 5.667   | -12.14 to 23.47   | No  | ns |
| CTR 18 vs. CTR 28 | 8.667   | -9.138 to 26.47   | No  | ns |
| CTR 18 vs. CTR 33 | 3       | -14.80 to 20.80   | No  | ns |
| CTR 18 vs. HD 60  | -10     | -27.80 to 7.805   | No  | ns |
| CTR 18 vs. HD 71  | -4.333  | -22.14 to 13.47   | No  | ns |
| CTR 18 vs. HD 77  | 9.417   | -7.238 to 26.07   | No  | ns |
| CTR 18 vs. HD 109 | 3       | -14.80 to 20.80   | No  | ns |
| CTR 18 vs. HD 180 | 9       | -8.805 to 26.80   | No  | ns |
| CTR 21 vs. CTR 28 | 3       | -14.80 to 20.80   | No  | ns |
| CTR 21 vs. CTR 33 | -2.667  | -20.47 to 15.14   | No  | ns |
| CTR 21 vs. HD 60  | -15.67  | -33.47 to 2.138   | No  | ns |
| CTR 21 vs. HD 71  | -10     | -27.80 to 7.805   | No  | ns |
| CTR 21 vs. HD 77  | 3.75    | -12.90 to 20.40   | No  | ns |
| CTR 21 vs. HD 109 | -2.667  | -20.47 to 15.14   | No  | ns |
| CTR 21 vs. HD 180 | 3.333   | -14.47 to 21.14   | No  | ns |
| CTR 28 vs. CTR 33 | -5.667  | -23.47 to 12.14   | No  | ns |
| CTR 28 vs. HD 60  | -18.67  | -36.47 to -0.8620 | Yes | *  |
| CTR 28 vs. HD 71  | -13     | -30.80 to 4.805   | No  | ns |
| CTR 28 vs. HD 77  | 0.75    | -15.90 to 17.40   | No  | ns |
| CTR 28 vs. HD 109 | -5.667  | -23.47 to 12.14   | No  | ns |
| CTR 28 vs. HD 180 | 0.3333  | -17.47 to 18.14   | No  | ns |
| CTR 33 vs. HD 60  | -13     | -30.80 to 4.805   | No  | ns |
| CTR 33 vs. HD 71  | -7.333  | -25.14 to 10.47   | No  | ns |
| CTR 33 vs. HD 77  | 6.417   | -10.24 to 23.07   | No  | ns |
| CTR 33 vs. HD 109 | 0       | -17.80 to 17.80   | No  | ns |

|                   |         |                  |     |    |
|-------------------|---------|------------------|-----|----|
| CTR 33 vs. HD 180 | 6       | -11.80 to 23.80  | No  | ns |
| HD 60 vs. HD 71   | 5.667   | -12.14 to 23.47  | No  | ns |
| HD 60 vs. HD 77   | 19.42   | 2.762 to 36.07   | Yes | *  |
| HD 60 vs. HD 109  | 13      | -4.805 to 30.80  | No  | ns |
| HD 60 vs. HD 180  | 19      | 1.195 to 36.80   | Yes | *  |
| HD 71 vs. HD 77   | 13.75   | -2.905 to 30.40  | No  | ns |
| HD 71 vs. HD 109  | 7.333   | -10.47 to 25.14  | No  | ns |
| HD 71 vs. HD 180  | 13.33   | -4.471 to 31.14  | No  | ns |
| HD 77 vs. HD 109  | -6.417  | -23.07 to 10.24  | No  | ns |
| HD 77 vs. HD 180  | -0.4167 | -17.07 to 16.24  | No  | ns |
| HD 109 vs. HD 180 | 6       | -11.80 to 23.80  | No  | ns |
| Day 28:           |         |                  |     |    |
| CTR 18 vs. CTR 21 | 1.75    | -17.22 to 20.72  | No  | ns |
| CTR 18 vs. CTR 28 | 11.75   | -7.219 to 30.72  | No  | ns |
| CTR 18 vs. CTR 33 | 6.75    | -12.22 to 25.72  | No  | ns |
| CTR 18 vs. HD 60  | 8.5     | -10.47 to 27.47  | No  | ns |
| CTR 18 vs. HD 71  | -6.25   | -25.22 to 12.72  | No  | ns |
| CTR 18 vs. HD 77  | 7       | -11.97 to 25.97  | No  | ns |
| CTR 18 vs. HD 109 | 5.75    | -13.22 to 24.72  | No  | ns |
| CTR 18 vs. HD 180 | -1.25   | -20.22 to 17.72  | No  | ns |
| CTR 21 vs. CTR 28 | 10      | -8.969 to 28.97  | No  | ns |
| CTR 21 vs. CTR 33 | 5       | -13.97 to 23.97  | No  | ns |
| CTR 21 vs. HD 60  | 6.75    | -12.22 to 25.72  | No  | ns |
| CTR 21 vs. HD 71  | -8      | -26.97 to 10.97  | No  | ns |
| CTR 21 vs. HD 77  | 5.25    | -13.72 to 24.22  | No  | ns |
| CTR 21 vs. HD 109 | 4       | -14.97 to 22.97  | No  | ns |
| CTR 21 vs. HD 180 | -3      | -21.97 to 15.97  | No  | ns |
| CTR 28 vs. CTR 33 | -5      | -23.97 to 13.97  | No  | ns |
| CTR 28 vs. HD 60  | -3.25   | -22.22 to 15.72  | No  | ns |
| CTR 28 vs. HD 71  | -18     | -36.97 to 0.9688 | No  | ns |
| CTR 28 vs. HD 77  | -4.75   | -23.72 to 14.22  | No  | ns |
| CTR 28 vs. HD 109 | -6      | -24.97 to 12.97  | No  | ns |
| CTR 28 vs. HD 180 | -13     | -31.97 to 5.969  | No  | ns |
| CTR 33 vs. HD 60  | 1.75    | -17.22 to 20.72  | No  | ns |
| CTR 33 vs. HD 71  | -13     | -31.97 to 5.969  | No  | ns |
| CTR 33 vs. HD 77  | 0.25    | -18.72 to 19.22  | No  | ns |
| CTR 33 vs. HD 109 | -1      | -19.97 to 17.97  | No  | ns |
| CTR 33 vs. HD 180 | -8      | -26.97 to 10.97  | No  | ns |
| HD 60 vs. HD 71   | -14.75  | -33.72 to 4.219  | No  | ns |
| HD 60 vs. HD 77   | -1.5    | -20.47 to 17.47  | No  | ns |
| HD 60 vs. HD 109  | -2.75   | -21.72 to 16.22  | No  | ns |
| HD 60 vs. HD 180  | -9.75   | -28.72 to 9.219  | No  | ns |

|                   |          |                 |    |    |
|-------------------|----------|-----------------|----|----|
| HD 71 vs. HD 77   | 13.25    | -5.719 to 32.22 | No | ns |
| HD 71 vs. HD 109  | 12       | -6.969 to 30.97 | No | ns |
| HD 71 vs. HD 180  | 5        | -13.97 to 23.97 | No | ns |
| HD 77 vs. HD 109  | -1.25    | -20.22 to 17.72 | No | ns |
| HD 77 vs. HD 180  | -8.25    | -27.22 to 10.72 | No | ns |
| HD 109 vs. HD 180 | -7       | -25.97 to 11.97 | No | ns |
| Day 42:           |          |                 |    |    |
| CTR 18 vs. CTR 21 | 0.01918  | -3.393 to 3.432 | No | ns |
| CTR 18 vs. CTR 28 | 0.8824   | -2.530 to 4.295 | No | ns |
| CTR 18 vs. CTR 33 | 0.6137   | -2.799 to 4.026 | No | ns |
| CTR 18 vs. HD 60  | 0.6569   | -3.964 to 5.278 | No | ns |
| CTR 18 vs. HD 71  | 0.4593   | -2.953 to 3.872 | No | ns |
| CTR 18 vs. HD 77  | 0.4623   | -2.950 to 3.875 | No | ns |
| CTR 18 vs. HD 109 | -1.176   | -4.862 to 2.510 | No | ns |
| CTR 18 vs. HD 180 | 0.1523   | -3.739 to 4.043 | No | ns |
| CTR 21 vs. CTR 28 | 0.8632   | -2.549 to 4.276 | No | ns |
| CTR 21 vs. CTR 33 | 0.5945   | -2.818 to 4.007 | No | ns |
| CTR 21 vs. HD 60  | 0.6378   | -3.983 to 5.258 | No | ns |
| CTR 21 vs. HD 71  | 0.4401   | -2.972 to 3.853 | No | ns |
| CTR 21 vs. HD 77  | 0.4431   | -2.969 to 3.856 | No | ns |
| CTR 21 vs. HD 109 | -1.195   | -4.881 to 2.491 | No | ns |
| CTR 21 vs. HD 180 | 0.1331   | -3.758 to 4.024 | No | ns |
| CTR 28 vs. CTR 33 | -0.2687  | -3.681 to 3.144 | No | ns |
| CTR 28 vs. HD 60  | -0.2254  | -4.846 to 4.395 | No | ns |
| CTR 28 vs. HD 71  | -0.4231  | -3.836 to 2.989 | No | ns |
| CTR 28 vs. HD 77  | -0.42    | -3.833 to 2.992 | No | ns |
| CTR 28 vs. HD 109 | -2.058   | -5.744 to 1.628 | No | ns |
| CTR 28 vs. HD 180 | -0.7301  | -4.621 to 3.161 | No | ns |
| CTR 33 vs. HD 60  | 0.04327  | -4.577 to 4.664 | No | ns |
| CTR 33 vs. HD 71  | -0.1544  | -3.567 to 3.258 | No | ns |
| CTR 33 vs. HD 77  | -0.1513  | -3.564 to 3.261 | No | ns |
| CTR 33 vs. HD 109 | -1.789   | -5.475 to 1.897 | No | ns |
| CTR 33 vs. HD 180 | -0.4614  | -4.352 to 3.429 | No | ns |
| HD 60 vs. HD 71   | -0.1977  | -4.818 to 4.423 | No | ns |
| HD 60 vs. HD 77   | -0.1946  | -4.815 to 4.426 | No | ns |
| HD 60 vs. HD 109  | -1.833   | -6.659 to 2.993 | No | ns |
| HD 60 vs. HD 180  | -0.5046  | -5.489 to 4.480 | No | ns |
| HD 71 vs. HD 77   | 0.003038 | -3.409 to 3.416 | No | ns |
| HD 71 vs. HD 109  | -1.635   | -5.321 to 2.051 | No | ns |
| HD 71 vs. HD 180  | -0.307   | -4.198 to 3.584 | No | ns |
| HD 77 vs. HD 109  | -1.638   | -5.324 to 2.048 | No | ns |
| HD 77 vs. HD 180  | -0.31    | -4.201 to 3.581 | No | ns |

|                   |         |                 |    |    |
|-------------------|---------|-----------------|----|----|
| HD 109 vs. HD 180 | 1.328   | -2.805 to 5.461 | No | ns |
| Day 56:           |         |                 |    |    |
| CTR 18 vs. CTR 21 | -1.926  | -15.64 to 11.79 | No | ns |
| CTR 18 vs. CTR 28 | -3.534  | -17.25 to 10.18 | No | ns |
| CTR 18 vs. CTR 33 | -3.489  | -15.87 to 8.894 | No | ns |
| CTR 18 vs. HD 60  | -6.229  | -19.95 to 7.490 | No | ns |
| CTR 18 vs. HD 71  | -0.4176 | -12.39 to 11.56 | No | ns |
| CTR 18 vs. HD 77  | 2.593   | -9.381 to 14.57 | No | ns |
| CTR 18 vs. HD 109 | -6.775  | -18.75 to 5.199 | No | ns |
| CTR 18 vs. HD 180 | 6.283   | -8.652 to 21.22 | No | ns |
| CTR 21 vs. CTR 28 | -1.609  | -16.07 to 12.85 | No | ns |
| CTR 21 vs. CTR 33 | -1.563  | -14.76 to 11.64 | No | ns |
| CTR 21 vs. HD 60  | -4.303  | -18.76 to 10.16 | No | ns |
| CTR 21 vs. HD 71  | 1.508   | -11.31 to 14.33 | No | ns |
| CTR 21 vs. HD 77  | 4.519   | -8.299 to 17.34 | No | ns |
| CTR 21 vs. HD 109 | -4.849  | -17.67 to 7.968 | No | ns |
| CTR 21 vs. HD 180 | 8.209   | -7.410 to 23.83 | No | ns |
| CTR 28 vs. CTR 33 | 0.04527 | -13.16 to 13.25 | No | ns |
| CTR 28 vs. HD 60  | -2.694  | -17.15 to 11.77 | No | ns |
| CTR 28 vs. HD 71  | 3.117   | -9.701 to 15.93 | No | ns |
| CTR 28 vs. HD 77  | 6.128   | -6.690 to 18.95 | No | ns |
| CTR 28 vs. HD 109 | -3.241  | -16.06 to 9.577 | No | ns |
| CTR 28 vs. HD 180 | 9.817   | -5.802 to 25.44 | No | ns |
| CTR 33 vs. HD 60  | -2.74   | -15.94 to 10.46 | No | ns |
| CTR 33 vs. HD 71  | 3.072   | -8.306 to 14.45 | No | ns |
| CTR 33 vs. HD 77  | 6.082   | -5.295 to 17.46 | No | ns |
| CTR 33 vs. HD 109 | -3.286  | -14.66 to 8.091 | No | ns |
| CTR 33 vs. HD 180 | 9.772   | -4.689 to 24.23 | No | ns |
| HD 60 vs. HD 71   | 5.811   | -7.007 to 18.63 | No | ns |
| HD 60 vs. HD 77   | 8.822   | -3.996 to 21.64 | No | ns |
| HD 60 vs. HD 109  | -0.5464 | -13.36 to 12.27 | No | ns |
| HD 60 vs. HD 180  | 12.51   | -3.108 to 28.13 | No | ns |
| HD 71 vs. HD 77   | 3.011   | -7.920 to 13.94 | No | ns |
| HD 71 vs. HD 109  | -6.358  | -17.29 to 4.573 | No | ns |
| HD 71 vs. HD 180  | 6.7     | -7.412 to 20.81 | No | ns |
| HD 77 vs. HD 109  | -9.369  | -20.30 to 1.562 | No | ns |
| HD 77 vs. HD 180  | 3.689   | -10.42 to 17.80 | No | ns |
| HD 109 vs. HD 180 | 13.06   | -1.054 to 27.17 | No | ns |
| Day 80:           |         |                 |    |    |
| CTR 18 vs. CTR 21 | 0.3072  | -6.063 to 6.677 | No | ns |
| CTR 18 vs. CTR 28 | -1.026  | -8.004 to 5.952 | No | ns |

|                                                               |            |        |                  |              |         |
|---------------------------------------------------------------|------------|--------|------------------|--------------|---------|
| CTR 18 vs. CTR 33                                             |            | 4.177  | -2.193 to 10.55  | No           | ns      |
| CTR 18 vs. HD 60                                              |            | 10.16  | 3.790 to 16.53   | Yes          | ***     |
| CTR 18 vs. HD 71                                              |            | 2.726  | -3.644 to 9.096  | No           | ns      |
| CTR 18 vs. HD 77                                              |            | 2.853  | -3.517 to 9.223  | No           | ns      |
| CTR 18 vs. HD 109                                             |            | 4.774  | -1.596 to 11.14  | No           | ns      |
| CTR 18 vs. HD 180                                             |            | 5.21   | -1.160 to 11.58  | No           | ns      |
| CTR 21 vs. CTR 28                                             |            | -1.333 | -7.703 to 5.037  | No           | ns      |
| CTR 21 vs. CTR 33                                             |            | 3.869  | -1.828 to 9.567  | No           | ns      |
| CTR 21 vs. HD 60                                              |            | 9.852  | 4.155 to 15.55   | Yes          | ***     |
| CTR 21 vs. HD 71                                              |            | 2.419  | -3.279 to 8.116  | No           | ns      |
| CTR 21 vs. HD 77                                              |            | 2.545  | -3.152 to 8.243  | No           | ns      |
| CTR 21 vs. HD 109                                             |            | 4.467  | -1.231 to 10.16  | No           | ns      |
| CTR 21 vs. HD 180                                             |            | 4.903  | -0.7945 to 10.60 | No           | ns      |
| CTR 28 vs. CTR 33                                             |            | 5.202  | -1.168 to 11.57  | No           | ns      |
| CTR 28 vs. HD 60                                              |            | 11.19  | 4.815 to 17.56   | Yes          | ***     |
| CTR 28 vs. HD 71                                              |            | 3.752  | -2.618 to 10.12  | No           | ns      |
| CTR 28 vs. HD 77                                              |            | 3.879  | -2.491 to 10.25  | No           | ns      |
| CTR 28 vs. HD 109                                             |            | 5.8    | -0.5701 to 12.17 | No           | ns      |
| CTR 28 vs. HD 180                                             |            | 6.236  | -0.1340 to 12.61 | No           | ns      |
| CTR 33 vs. HD 60                                              |            | 5.983  | 0.2856 to 11.68  | Yes          | *       |
| CTR 33 vs. HD 71                                              |            | -1.451 | -7.148 to 4.247  | No           | ns      |
| CTR 33 vs. HD 77                                              |            | -1.324 | -7.021 to 4.374  | No           | ns      |
| CTR 33 vs. HD 109                                             |            | 0.5975 | -5.100 to 6.295  | No           | ns      |
| CTR 33 vs. HD 180                                             |            | 1.034  | -4.664 to 6.731  | No           | ns      |
| HD 60 vs. HD 71                                               |            | -7.434 | -13.13 to -1.736 | Yes          | **      |
| HD 60 vs. HD 77                                               |            | -7.307 | -13.00 to -1.609 | Yes          | **      |
| HD 60 vs. HD 109                                              |            | -5.386 | -11.08 to 0.3119 | No           | ns      |
| HD 60 vs. HD 180                                              |            | -4.949 | -10.65 to 0.7480 | No           | ns      |
| HD 71 vs. HD 77                                               |            | 0.1268 | -5.571 to 5.824  | No           | ns      |
| HD 71 vs. HD 109                                              |            | 2.048  | -3.649 to 7.746  | No           | ns      |
| HD 71 vs. HD 180                                              |            | 2.484  | -3.213 to 8.182  | No           | ns      |
| HD 77 vs. HD 109                                              |            | 1.921  | -3.776 to 7.619  | No           | ns      |
| HD 77 vs. HD 180                                              |            | 2.357  | -3.340 to 8.055  | No           | ns      |
| HD 109 vs. HD 180                                             |            | 0.4362 | -5.261 to 6.134  | No           | ns      |
| <b>One-way ANOVA (between time points, within cell lines)</b> |            |        |                  |              |         |
| Bonferroni's multiple comparisons test                        | Mean Diff. |        | 95% CI of diff.  | Significant? | Summary |
| CTR 18:                                                       |            |        |                  |              |         |
| Day 0 vs. Day 7                                               |            | -3.333 | -14.37 to 7.708  | No           | ns      |
| Day 0 vs. Day 14                                              |            | -2     | -13.04 to 9.042  | No           | ns      |
| Day 0 vs. Day 28                                              |            | -6.583 | -16.91 to 3.745  | No           | ns      |
| Day 0 vs. Day 42                                              |            | 1.228  | -7.927 to 10.38  | No           | ns      |

|                   |  |        |                   |     |    |
|-------------------|--|--------|-------------------|-----|----|
| Day 0 vs. Day 56  |  | -6.117 | -15.99 to 3.759   | No  | ns |
| Day 0 vs. Day 80  |  | -2.493 | -14.84 to 9.852   | No  | ns |
| Day 7 vs. Day 14  |  | 1.333  | -9.708 to 12.37   | No  | ns |
| Day 7 vs. Day 28  |  | -3.25  | -13.58 to 7.079   | No  | ns |
| Day 7 vs. Day 42  |  | 4.562  | -4.593 to 13.72   | No  | ns |
| Day 7 vs. Day 56  |  | -2.784 | -12.66 to 7.092   | No  | ns |
| Day 7 vs. Day 80  |  | 0.8404 | -11.50 to 13.19   | No  | ns |
| Day 14 vs. Day 28 |  | -4.583 | -14.91 to 5.745   | No  | ns |
| Day 14 vs. Day 42 |  | 3.228  | -5.927 to 12.38   | No  | ns |
| Day 14 vs. Day 56 |  | -4.117 | -13.99 to 5.759   | No  | ns |
| Day 14 vs. Day 80 |  | -0.493 | -12.84 to 11.85   | No  | ns |
| Day 28 vs. Day 42 |  | 7.812  | -0.4694 to 16.09  | No  | ns |
| Day 28 vs. Day 56 |  | 0.4663 | -8.605 to 9.538   | No  | ns |
| Day 28 vs. Day 80 |  | 4.09   | -7.621 to 15.80   | No  | ns |
| Day 42 vs. Day 56 |  | -7.345 | -15.05 to 0.3639  | No  | ns |
| Day 42 vs. Day 80 |  | -3.721 | -14.41 to 6.970   | No  | ns |
| Day 56 vs. Day 80 |  | 3.624  | -7.690 to 14.94   | No  | ns |
| CTR 21:           |  |        |                   |     |    |
| Day 0 vs. Day 7   |  | 3      | -7.681 to 13.68   | No  | ns |
| Day 0 vs. Day 14  |  | 1.333  | -9.348 to 12.01   | No  | ns |
| Day 0 vs. Day 28  |  | -7.167 | -17.16 to 2.825   | No  | ns |
| Day 0 vs. Day 42  |  | -1.086 | -9.942 to 7.771   | No  | ns |
| Day 0 vs. Day 56  |  | -10.38 | -20.37 to -0.3846 | Yes | *  |
| Day 0 vs. Day 80  |  | -4.519 | -15.20 to 6.162   | No  | ns |
| Day 7 vs. Day 14  |  | -1.667 | -12.35 to 9.015   | No  | ns |
| Day 7 vs. Day 28  |  | -10.17 | -20.16 to -0.1751 | Yes | *  |
| Day 7 vs. Day 42  |  | -4.086 | -12.94 to 4.771   | No  | ns |
| Day 7 vs. Day 56  |  | -13.38 | -23.37 to -3.385  | Yes | ** |
| Day 7 vs. Day 80  |  | -7.519 | -18.20 to 3.162   | No  | ns |
| Day 14 vs. Day 28 |  | -8.5   | -18.49 to 1.492   | No  | ns |
| Day 14 vs. Day 42 |  | -2.419 | -11.28 to 6.438   | No  | ns |
| Day 14 vs. Day 56 |  | -11.71 | -21.70 to -1.718  | Yes | *  |
| Day 14 vs. Day 80 |  | -5.852 | -16.53 to 4.829   | No  | ns |
| Day 28 vs. Day 42 |  | 6.081  | -1.930 to 14.09   | No  | ns |
| Day 28 vs. Day 56 |  | -3.21  | -12.46 to 6.041   | No  | ns |
| Day 28 vs. Day 80 |  | 2.648  | -7.344 to 12.64   | No  | ns |
| Day 42 vs. Day 56 |  | -9.29  | -17.30 to -1.279  | Yes | *  |
| Day 42 vs. Day 80 |  | -3.433 | -12.29 to 5.423   | No  | ns |
| Day 56 vs. Day 80 |  | 5.857  | -4.135 to 15.85   | No  | ns |
| CTR 28:           |  |        |                   |     |    |
| Day 0 vs. Day 7   |  | 8      | -8.981 to 24.98   | No  | ns |

|                   |         |                   |     |     |
|-------------------|---------|-------------------|-----|-----|
| Day 0 vs. Day 14  | 9       | -7.981 to 25.98   | No  | ns  |
| Day 0 vs. Day 28  | 7.5     | -8.384 to 23.38   | No  | ns  |
| Day 0 vs. Day 42  | 4.444   | -9.636 to 18.52   | No  | ns  |
| Day 0 vs. Day 56  | -7.318  | -23.20 to 8.566   | No  | ns  |
| Day 0 vs. Day 80  | -1.185  | -20.17 to 17.80   | No  | ns  |
| Day 7 vs. Day 14  | 1       | -15.98 to 17.98   | No  | ns  |
| Day 7 vs. Day 28  | -0.5    | -16.38 to 15.38   | No  | ns  |
| Day 7 vs. Day 42  | -3.556  | -17.64 to 10.52   | No  | ns  |
| Day 7 vs. Day 56  | -15.32  | -31.20 to 0.5661  | No  | ns  |
| Day 7 vs. Day 80  | -9.185  | -28.17 to 9.800   | No  | ns  |
| Day 14 vs. Day 28 | -1.5    | -17.38 to 14.38   | No  | ns  |
| Day 14 vs. Day 42 | -4.556  | -18.64 to 9.524   | No  | ns  |
| Day 14 vs. Day 56 | -16.32  | -32.20 to -0.4339 | Yes | *   |
| Day 14 vs. Day 80 | -10.19  | -29.17 to 8.800   | No  | ns  |
| Day 28 vs. Day 42 | -3.056  | -15.79 to 9.680   | No  | ns  |
| Day 28 vs. Day 56 | -14.82  | -29.52 to -0.1122 | Yes | *   |
| Day 28 vs. Day 80 | -8.685  | -26.70 to 9.325   | No  | ns  |
| Day 42 vs. Day 56 | -11.76  | -24.50 to 0.9735  | No  | ns  |
| Day 42 vs. Day 80 | -5.63   | -22.07 to 10.81   | No  | ns  |
| Day 56 vs. Day 80 | 6.133   | -11.88 to 24.14   | No  | ns  |
| CTR 33:           |         |                   |     |     |
| Day 0 vs. Day 7   | 2.667   | -8.015 to 13.35   | No  | ns  |
| Day 0 vs. Day 14  | -1.667  | -12.35 to 9.015   | No  | ns  |
| Day 0 vs. Day 28  | -2.5    | -12.49 to 7.491   | No  | ns  |
| Day 0 vs. Day 42  | -0.8245 | -9.681 to 8.032   | No  | ns  |
| Day 0 vs. Day 56  | -12.27  | -21.52 to -3.022  | Yes | **  |
| Day 0 vs. Day 80  | -0.9831 | -11.66 to 9.698   | No  | ns  |
| Day 7 vs. Day 14  | -4.333  | -15.01 to 6.348   | No  | ns  |
| Day 7 vs. Day 28  | -5.167  | -15.16 to 4.825   | No  | ns  |
| Day 7 vs. Day 42  | -3.491  | -12.35 to 5.365   | No  | ns  |
| Day 7 vs. Day 56  | -14.94  | -24.19 to -5.689  | Yes | *** |
| Day 7 vs. Day 80  | -3.65   | -14.33 to 7.032   | No  | ns  |
| Day 14 vs. Day 28 | -0.8333 | -10.82 to 9.158   | No  | ns  |
| Day 14 vs. Day 42 | 0.8421  | -8.014 to 9.699   | No  | ns  |
| Day 14 vs. Day 56 | -10.61  | -19.86 to -1.356  | Yes | *   |
| Day 14 vs. Day 80 | 0.6835  | -9.998 to 11.36   | No  | ns  |
| Day 28 vs. Day 42 | 1.675   | -6.336 to 9.686   | No  | ns  |
| Day 28 vs. Day 56 | -9.773  | -18.22 to -1.328  | Yes | *   |
| Day 28 vs. Day 80 | 1.517   | -8.475 to 11.51   | No  | ns  |
| Day 42 vs. Day 56 | -11.45  | -18.51 to -4.383  | Yes | *** |
| Day 42 vs. Day 80 | -0.1586 | -9.015 to 8.698   | No  | ns  |
| Day 56 vs. Day 80 | 11.29   | 2.039 to 20.54    | Yes | **  |

|                   |          |                    |     |     |
|-------------------|----------|--------------------|-----|-----|
| HD 60:            |          |                    |     |     |
| Day 0 vs. Day 7   | -4.667   | -30.41 to 21.08    | No  | ns  |
| Day 0 vs. Day 14  | -4.667   | -30.41 to 21.08    | No  | ns  |
| Day 0 vs. Day 28  | 9.25     | -14.83 to 33.33    | No  | ns  |
| Day 0 vs. Day 42  | 9.219    | -16.52 to 34.96    | No  | ns  |
| Day 0 vs. Day 56  | -5.012   | -29.09 to 19.07    | No  | ns  |
| Day 7 vs. Day 14  | 0        | -25.74 to 25.74    | No  | ns  |
| Day 7 vs. Day 28  | 13.92    | -10.16 to 38.00    | No  | ns  |
| Day 7 vs. Day 42  | 13.89    | -11.86 to 39.63    | No  | ns  |
| Day 7 vs. Day 56  | -0.3457  | -24.43 to 23.74    | No  | ns  |
| Day 14 vs. Day 28 | 13.92    | -10.16 to 38.00    | No  | ns  |
| Day 14 vs. Day 42 | 13.89    | -11.86 to 39.63    | No  | ns  |
| Day 14 vs. Day 56 | -0.3457  | -24.43 to 23.74    | No  | ns  |
| Day 28 vs. Day 42 | -0.03128 | -24.11 to 24.05    | No  | ns  |
| Day 28 vs. Day 56 | -14.26   | -36.56 to 8.032    | No  | ns  |
| Day 42 vs. Day 56 | -14.23   | -38.31 to 9.850    | No  | ns  |
| HD 71:            |          |                    |     |     |
| Day 0 vs. Day 7   | 0.6667   | -12.28 to 13.61    | No  | ns  |
| Day 0 vs. Day 14  | -12.33   | -25.28 to 0.6095   | No  | ns  |
| Day 0 vs. Day 28  | -18.83   | -30.94 to -6.726   | Yes | *** |
| Day 0 vs. Day 42  | -4.312   | -15.04 to 6.419    | No  | ns  |
| Day 0 vs. Day 56  | -12.53   | -23.47 to -1.596   | Yes | *   |
| Day 0 vs. Day 80  | -5.767   | -18.71 to 7.176    | No  | ns  |
| Day 7 vs. Day 14  | -13      | -25.94 to -0.05718 | Yes | *   |
| Day 7 vs. Day 28  | -19.5    | -31.61 to -7.393   | Yes | *** |
| Day 7 vs. Day 42  | -4.979   | -15.71 to 5.753    | No  | ns  |
| Day 7 vs. Day 56  | -13.2    | -24.14 to -2.263   | Yes | **  |
| Day 7 vs. Day 80  | -6.434   | -19.38 to 6.509    | No  | ns  |
| Day 14 vs. Day 28 | -6.5     | -18.61 to 5.607    | No  | ns  |
| Day 14 vs. Day 42 | 8.021    | -2.711 to 18.75    | No  | ns  |
| Day 14 vs. Day 56 | -0.2012  | -11.14 to 10.74    | No  | ns  |
| Day 14 vs. Day 80 | 6.566    | -6.377 to 19.51    | No  | ns  |
| Day 28 vs. Day 42 | 14.52    | 4.814 to 24.23     | Yes | *** |
| Day 28 vs. Day 56 | 6.299    | -3.637 to 16.23    | No  | ns  |
| Day 28 vs. Day 80 | 13.07    | 0.9593 to 25.17    | Yes | *   |
| Day 42 vs. Day 56 | -8.222   | -16.43 to -0.01830 | Yes | *   |
| Day 42 vs. Day 80 | -1.455   | -12.19 to 9.277    | No  | ns  |
| Day 56 vs. Day 80 | 6.767    | -4.171 to 17.71    | No  | ns  |
| HD 77:            |          |                    |     |     |
| Day 0 vs. Day 7   | -0.3333  | -10.34 to 9.676    | No  | ns  |



|                   |          |                   |     |     |
|-------------------|----------|-------------------|-----|-----|
| Day 0 vs. Day 14  | 0.08333  | -9.280 to 9.446   | No  | ns  |
| Day 0 vs. Day 28  | -6.917   | -16.28 to 2.446   | No  | ns  |
| Day 0 vs. Day 42  | -5.643   | -13.94 to 2.657   | No  | ns  |
| Day 0 vs. Day 56  | -10.86   | -19.32 to -2.397  | Yes | **  |
| Day 0 vs. Day 80  | -6.974   | -16.98 to 3.036   | No  | ns  |
| Day 7 vs. Day 14  | 0.4167   | -8.946 to 9.780   | No  | ns  |
| Day 7 vs. Day 28  | -6.583   | -15.95 to 2.780   | No  | ns  |
| Day 7 vs. Day 42  | -5.309   | -13.61 to 2.990   | No  | ns  |
| Day 7 vs. Day 56  | -10.52   | -18.98 to -2.064  | Yes | **  |
| Day 7 vs. Day 80  | -6.64    | -16.65 to 3.369   | No  | ns  |
| Day 14 vs. Day 28 | -7       | -15.67 to 1.669   | No  | ns  |
| Day 14 vs. Day 42 | -5.726   | -13.23 to 1.781   | No  | ns  |
| Day 14 vs. Day 56 | -10.94   | -18.62 to -3.256  | Yes | **  |
| Day 14 vs. Day 80 | -7.057   | -16.42 to 2.306   | No  | ns  |
| Day 28 vs. Day 42 | 1.274    | -6.233 to 8.781   | No  | ns  |
| Day 28 vs. Day 56 | -3.94    | -11.62 to 3.744   | No  | ns  |
| Day 28 vs. Day 80 | -0.05696 | -9.420 to 9.306   | No  | ns  |
| Day 42 vs. Day 56 | -5.214   | -11.56 to 1.130   | No  | ns  |
| Day 42 vs. Day 80 | -1.331   | -9.631 to 6.968   | No  | ns  |
| Day 56 vs. Day 80 | 3.883    | -4.576 to 12.34   | No  | ns  |
| HD 109:           |          |                   |     |     |
| Day 0 vs. Day 7   | -0.6667  | -13.00 to 11.67   | No  | ns  |
| Day 0 vs. Day 14  | 2        | -10.33 to 14.33   | No  | ns  |
| Day 0 vs. Day 28  | 0.1667   | -11.37 to 11.70   | No  | ns  |
| Day 0 vs. Day 42  | 1.053    | -9.628 to 11.73   | No  | ns  |
| Day 0 vs. Day 56  | -11.89   | -22.32 to -1.468  | Yes | *   |
| Day 0 vs. Day 80  | 3.281    | -9.053 to 15.61   | No  | ns  |
| Day 7 vs. Day 14  | 2.667    | -9.667 to 15.00   | No  | ns  |
| Day 7 vs. Day 28  | 0.8333   | -10.70 to 12.37   | No  | ns  |
| Day 7 vs. Day 42  | 1.719    | -8.962 to 12.40   | No  | ns  |
| Day 7 vs. Day 56  | -11.23   | -21.65 to -0.8017 | Yes | *   |
| Day 7 vs. Day 80  | 3.948    | -8.386 to 16.28   | No  | ns  |
| Day 14 vs. Day 28 | -1.833   | -13.37 to 9.704   | No  | ns  |
| Day 14 vs. Day 42 | -0.9472  | -11.63 to 9.734   | No  | ns  |
| Day 14 vs. Day 56 | -13.89   | -24.32 to -3.468  | Yes | **  |
| Day 14 vs. Day 80 | 1.281    | -11.05 to 13.61   | No  | ns  |
| Day 28 vs. Day 42 | 0.8861   | -8.864 to 10.64   | No  | ns  |
| Day 28 vs. Day 56 | -12.06   | -21.53 to -2.591  | Yes | **  |
| Day 28 vs. Day 80 | 3.114    | -8.423 to 14.65   | No  | ns  |
| Day 42 vs. Day 56 | -12.94   | -21.35 to -4.541  | Yes | *** |
| Day 42 vs. Day 80 | 2.228    | -8.453 to 12.91   | No  | ns  |
| Day 56 vs. Day 80 | 15.17    | 4.749 to 25.60    | Yes | **  |

|                   |  |         |                 |    |    |
|-------------------|--|---------|-----------------|----|----|
| <b>HD 180:</b>    |  |         |                 |    |    |
| Day 0 vs. Day 7   |  | 5.667   | -20.13 to 31.46 | No | ns |
| Day 0 vs. Day 14  |  | 6.667   | -19.13 to 32.46 | No | ns |
| Day 0 vs. Day 28  |  | -8.167  | -32.30 to 15.96 | No | ns |
| Day 0 vs. Day 42  |  | 1.047   | -22.03 to 24.12 | No | ns |
| Day 0 vs. Day 56  |  | -0.1676 | -25.96 to 25.63 | No | ns |
| Day 0 vs. Day 80  |  | 2.384   | -23.41 to 28.18 | No | ns |
| Day 7 vs. Day 14  |  | 1       | -24.80 to 26.80 | No | ns |
| Day 7 vs. Day 28  |  | -13.83  | -37.96 to 10.30 | No | ns |
| Day 7 vs. Day 42  |  | -4.619  | -27.69 to 18.45 | No | ns |
| Day 7 vs. Day 56  |  | -5.834  | -31.63 to 19.96 | No | ns |
| Day 7 vs. Day 80  |  | -3.283  | -29.08 to 22.51 | No | ns |
| Day 14 vs. Day 28 |  | -14.83  | -38.96 to 9.297 | No | ns |
| Day 14 vs. Day 42 |  | -5.619  | -28.69 to 17.45 | No | ns |
| Day 14 vs. Day 56 |  | -6.834  | -32.63 to 18.96 | No | ns |
| Day 14 vs. Day 80 |  | -4.283  | -30.08 to 21.51 | No | ns |
| Day 28 vs. Day 42 |  | 9.214   | -11.98 to 30.41 | No | ns |
| Day 28 vs. Day 56 |  | 7.999   | -16.13 to 32.13 | No | ns |
| Day 28 vs. Day 80 |  | 10.55   | -13.58 to 34.68 | No | ns |
| Day 42 vs. Day 56 |  | -1.215  | -24.29 to 21.86 | No | ns |
| Day 42 vs. Day 80 |  | 1.336   | -21.74 to 24.41 | No | ns |
| Day 56 vs. Day 80 |  | 2.551   | -23.24 to 28.35 | No | ns |

#### NeuroD1

| <b>Two-way ANOVA</b>                                         |  |                 |                 |                        |         |
|--------------------------------------------------------------|--|-----------------|-----------------|------------------------|---------|
| Source of Variation                                          |  | P value summary | Significant?    |                        |         |
| Interaction                                                  |  | *               | Yes             |                        |         |
| Column Factor                                                |  | ****            | Yes             |                        |         |
| Row Factor                                                   |  | *               | Yes             |                        |         |
| <b>One-way ANOVA (between cell lines, within time point)</b> |  |                 |                 |                        |         |
| Bonferroni's Multiple Comparison Test                        |  | Mean Diff.      | t               | Significant? P < 0.05? | Summary |
| <b>Day 0:</b>                                                |  |                 |                 |                        |         |
| CTR 18 vs. CTR 21                                            |  | -8.667          | -56.93 to 39.60 | No                     | ns      |
| CTR 18 vs. CTR 28                                            |  | 0.3333          | -47.93 to 48.60 | No                     | ns      |
| CTR 18 vs. CTR 33                                            |  | -13             | -61.27 to 35.27 | No                     | ns      |
| CTR 18 vs. HD 60                                             |  | 2               | -46.27 to 50.27 | No                     | ns      |
| CTR 18 vs. HD 71                                             |  | -4.667          | -52.93 to 43.60 | No                     | ns      |
| CTR 18 vs. HD 77                                             |  | 0.6667          | -47.60 to 48.93 | No                     | ns      |
| CTR 18 vs. HD 109                                            |  | 1               | -47.27 to 49.27 | No                     | ns      |
| CTR 18 vs. HD 180                                            |  | 1               | -47.27 to 49.27 | No                     | ns      |

|                   |        |                 |    |    |
|-------------------|--------|-----------------|----|----|
| CTR 21 vs. CTR 28 | 9      | -39.27 to 57.27 | No | ns |
| CTR 21 vs. CTR 33 | -4.333 | -52.60 to 43.93 | No | ns |
| CTR 21 vs. HD 60  | 10.67  | -37.60 to 58.93 | No | ns |
| CTR 21 vs. HD 71  | 4      | -44.27 to 52.27 | No | ns |
| CTR 21 vs. HD 77  | 9.333  | -38.93 to 57.60 | No | ns |
| CTR 21 vs. HD 109 | 9.667  | -38.60 to 57.93 | No | ns |
| CTR 21 vs. HD 180 | 9.667  | -38.60 to 57.93 | No | ns |
| CTR 28 vs. CTR 33 | -13.33 | -61.60 to 34.93 | No | ns |
| CTR 28 vs. HD 60  | 1.667  | -46.60 to 49.93 | No | ns |
| CTR 28 vs. HD 71  | -5     | -53.27 to 43.27 | No | ns |
| CTR 28 vs. HD 77  | 0.3333 | -47.93 to 48.60 | No | ns |
| CTR 28 vs. HD 109 | 0.6667 | -47.60 to 48.93 | No | ns |
| CTR 28 vs. HD 180 | 0.6667 | -47.60 to 48.93 | No | ns |
| CTR 33 vs. HD 60  | 15     | -33.27 to 63.27 | No | ns |
| CTR 33 vs. HD 71  | 8.333  | -39.93 to 56.60 | No | ns |
| CTR 33 vs. HD 77  | 13.67  | -34.60 to 61.93 | No | ns |
| CTR 33 vs. HD 109 | 14     | -34.27 to 62.27 | No | ns |
| CTR 33 vs. HD 180 | 14     | -34.27 to 62.27 | No | ns |
| HD 60 vs. HD 71   | -6.667 | -54.93 to 41.60 | No | ns |
| HD 60 vs. HD 77   | -1.333 | -49.60 to 46.93 | No | ns |
| HD 60 vs. HD 109  | -1     | -49.27 to 47.27 | No | ns |
| HD 60 vs. HD 180  | -1     | -49.27 to 47.27 | No | ns |
| HD 71 vs. HD 77   | 5.333  | -42.93 to 53.60 | No | ns |
| HD 71 vs. HD 109  | 5.667  | -42.60 to 53.93 | No | ns |
| HD 71 vs. HD 180  | 5.667  | -42.60 to 53.93 | No | ns |
| HD 77 vs. HD 109  | 0.3333 | -47.93 to 48.60 | No | ns |
| HD 77 vs. HD 180  | 0.3333 | -47.93 to 48.60 | No | ns |
| HD 109 vs. HD 180 | 0      | -48.27 to 48.27 | No | ns |
| Day 7:            |        |                 |    |    |
| CTR 18 vs. CTR 21 | 2      | -21.97 to 25.97 | No | ns |
| CTR 18 vs. CTR 28 | 2      | -21.97 to 25.97 | No | ns |
| CTR 18 vs. CTR 33 | 4      | -19.97 to 27.97 | No | ns |
| CTR 18 vs. HD 60  | -2.667 | -26.63 to 21.30 | No | ns |
| CTR 18 vs. HD 71  | 6.667  | -17.30 to 30.63 | No | ns |
| CTR 18 vs. HD 77  | -10.67 | -34.63 to 13.30 | No | ns |
| CTR 18 vs. HD 109 | -7.333 | -31.30 to 16.63 | No | ns |
| CTR 18 vs. HD 180 | -4.667 | -28.63 to 19.30 | No | ns |
| CTR 21 vs. CTR 28 | 0      | -23.97 to 23.97 | No | ns |
| CTR 21 vs. CTR 33 | 2      | -21.97 to 25.97 | No | ns |
| CTR 21 vs. HD 60  | -4.667 | -28.63 to 19.30 | No | ns |
| CTR 21 vs. HD 71  | 4.667  | -19.30 to 28.63 | No | ns |
| CTR 21 vs. HD 77  | -12.67 | -36.63 to 11.30 | No | ns |

|                   |  |        |                 |    |    |
|-------------------|--|--------|-----------------|----|----|
| CTR 21 vs. HD 109 |  | -9.333 | -33.30 to 14.63 | No | ns |
| CTR 21 vs. HD 180 |  | -6.667 | -30.63 to 17.30 | No | ns |
| CTR 28 vs. CTR 33 |  | 2      | -21.97 to 25.97 | No | ns |
| CTR 28 vs. HD 60  |  | -4.667 | -28.63 to 19.30 | No | ns |
| CTR 28 vs. HD 71  |  | 4.667  | -19.30 to 28.63 | No | ns |
| CTR 28 vs. HD 77  |  | -12.67 | -36.63 to 11.30 | No | ns |
| CTR 28 vs. HD 109 |  | -9.333 | -33.30 to 14.63 | No | ns |
| CTR 28 vs. HD 180 |  | -6.667 | -30.63 to 17.30 | No | ns |
| CTR 33 vs. HD 60  |  | -6.667 | -30.63 to 17.30 | No | ns |
| CTR 33 vs. HD 71  |  | 2.667  | -21.30 to 26.63 | No | ns |
| CTR 33 vs. HD 77  |  | -14.67 | -38.63 to 9.299 | No | ns |
| CTR 33 vs. HD 109 |  | -11.33 | -35.30 to 12.63 | No | ns |
| CTR 33 vs. HD 180 |  | -8.667 | -32.63 to 15.30 | No | ns |
| HD 60 vs. HD 71   |  | 9.333  | -14.63 to 33.30 | No | ns |
| HD 60 vs. HD 77   |  | -8     | -31.97 to 15.97 | No | ns |
| HD 60 vs. HD 109  |  | -4.667 | -28.63 to 19.30 | No | ns |
| HD 60 vs. HD 180  |  | -2     | -25.97 to 21.97 | No | ns |
| HD 71 vs. HD 77   |  | -17.33 | -41.30 to 6.633 | No | ns |
| HD 71 vs. HD 109  |  | -14    | -37.97 to 9.966 | No | ns |
| HD 71 vs. HD 180  |  | -11.33 | -35.30 to 12.63 | No | ns |
| HD 77 vs. HD 109  |  | 3.333  | -20.63 to 27.30 | No | ns |
| HD 77 vs. HD 180  |  | 6      | -17.97 to 29.97 | No | ns |
| HD 109 vs. HD 180 |  | 2.667  | -21.30 to 26.63 | No | ns |
| Day 14:           |  |        |                 |    |    |
| CTR 18 vs. CTR 21 |  | -6.333 | -51.24 to 38.57 | No | ns |
| CTR 18 vs. CTR 28 |  | 31.33  | -13.57 to 76.24 | No | ns |
| CTR 18 vs. CTR 33 |  | 11.67  | -33.24 to 56.57 | No | ns |
| CTR 18 vs. HD 60  |  | 10.33  | -34.57 to 55.24 | No | ns |
| CTR 18 vs. HD 71  |  | -1     | -45.90 to 43.90 | No | ns |
| CTR 18 vs. HD 77  |  | -1     | -45.90 to 43.90 | No | ns |
| CTR 18 vs. HD 109 |  | 12.33  | -32.57 to 57.24 | No | ns |
| CTR 18 vs. HD 180 |  | -5.667 | -50.57 to 39.24 | No | ns |
| CTR 21 vs. CTR 28 |  | 37.67  | -7.238 to 82.57 | No | ns |
| CTR 21 vs. CTR 33 |  | 18     | -26.90 to 62.90 | No | ns |
| CTR 21 vs. HD 60  |  | 16.67  | -28.24 to 61.57 | No | ns |
| CTR 21 vs. HD 71  |  | 5.333  | -39.57 to 50.24 | No | ns |
| CTR 21 vs. HD 77  |  | 5.333  | -39.57 to 50.24 | No | ns |
| CTR 21 vs. HD 109 |  | 18.67  | -26.24 to 63.57 | No | ns |
| CTR 21 vs. HD 180 |  | 0.6667 | -44.24 to 45.57 | No | ns |
| CTR 28 vs. CTR 33 |  | -19.67 | -64.57 to 25.24 | No | ns |
| CTR 28 vs. HD 60  |  | -21    | -65.90 to 23.90 | No | ns |
| CTR 28 vs. HD 71  |  | -32.33 | -77.24 to 12.57 | No | ns |

|                   |        |                   |     |    |
|-------------------|--------|-------------------|-----|----|
| CTR 28 vs. HD 77  | -32.33 | -77.24 to 12.57   | No  | ns |
| CTR 28 vs. HD 109 | -19    | -63.90 to 25.90   | No  | ns |
| CTR 28 vs. HD 180 | -37    | -81.90 to 7.905   | No  | ns |
| CTR 33 vs. HD 60  | -1.333 | -46.24 to 43.57   | No  | ns |
| CTR 33 vs. HD 71  | -12.67 | -57.57 to 32.24   | No  | ns |
| CTR 33 vs. HD 77  | -12.67 | -57.57 to 32.24   | No  | ns |
| CTR 33 vs. HD 109 | 0.6667 | -44.24 to 45.57   | No  | ns |
| CTR 33 vs. HD 180 | -17.33 | -62.24 to 27.57   | No  | ns |
| HD 60 vs. HD 71   | -11.33 | -56.24 to 33.57   | No  | ns |
| HD 60 vs. HD 77   | -11.33 | -56.24 to 33.57   | No  | ns |
| HD 60 vs. HD 109  | 2      | -42.90 to 46.90   | No  | ns |
| HD 60 vs. HD 180  | -16    | -60.90 to 28.90   | No  | ns |
| HD 71 vs. HD 77   | 0      | -44.90 to 44.90   | No  | ns |
| HD 71 vs. HD 109  | 13.33  | -31.57 to 58.24   | No  | ns |
| HD 71 vs. HD 180  | -4.667 | -49.57 to 40.24   | No  | ns |
| HD 77 vs. HD 109  | 13.33  | -31.57 to 58.24   | No  | ns |
| HD 77 vs. HD 180  | -4.667 | -49.57 to 40.24   | No  | ns |
| HD 109 vs. HD 180 | -18    | -62.90 to 26.90   | No  | ns |
|                   |        |                   |     |    |
| Day 28:           |        |                   |     |    |
| CTR 18 vs. CTR 21 | 3.75   | -25.76 to 33.26   | No  | ns |
| CTR 18 vs. CTR 28 | 22.75  | -6.759 to 52.26   | No  | ns |
| CTR 18 vs. CTR 33 | 17.25  | -12.26 to 46.76   | No  | ns |
| CTR 18 vs. HD 60  | 3      | -26.51 to 32.51   | No  | ns |
| CTR 18 vs. HD 71  | -5.85  | -33.84 to 22.14   | No  | ns |
| CTR 18 vs. HD 77  | 4      | -25.51 to 33.51   | No  | ns |
| CTR 18 vs. HD 109 | 3.25   | -26.26 to 32.76   | No  | ns |
| CTR 18 vs. HD 180 | -8.75  | -38.26 to 20.76   | No  | ns |
| CTR 21 vs. CTR 28 | 19     | -10.51 to 48.51   | No  | ns |
| CTR 21 vs. CTR 33 | 13.5   | -16.01 to 43.01   | No  | ns |
| CTR 21 vs. HD 60  | -0.75  | -30.26 to 28.76   | No  | ns |
| CTR 21 vs. HD 71  | -9.6   | -37.59 to 18.39   | No  | ns |
| CTR 21 vs. HD 77  | 0.25   | -29.26 to 29.76   | No  | ns |
| CTR 21 vs. HD 109 | -0.5   | -30.01 to 29.01   | No  | ns |
| CTR 21 vs. HD 180 | -12.5  | -42.01 to 17.01   | No  | ns |
| CTR 28 vs. CTR 33 | -5.5   | -35.01 to 24.01   | No  | ns |
| CTR 28 vs. HD 60  | -19.75 | -49.26 to 9.759   | No  | ns |
| CTR 28 vs. HD 71  | -28.6  | -56.59 to -0.6050 | Yes | *  |
| CTR 28 vs. HD 77  | -18.75 | -48.26 to 10.76   | No  | ns |
| CTR 28 vs. HD 109 | -19.5  | -49.01 to 10.01   | No  | ns |
| CTR 28 vs. HD 180 | -31.5  | -61.01 to -1.991  | Yes | *  |
| CTR 33 vs. HD 60  | -14.25 | -43.76 to 15.26   | No  | ns |
| CTR 33 vs. HD 71  | -23.1  | -51.09 to 4.895   | No  | ns |

|                   |          |                  |    |    |
|-------------------|----------|------------------|----|----|
| CTR 33 vs. HD 77  | -13.25   | -42.76 to 16.26  | No | ns |
| CTR 33 vs. HD 109 | -14      | -43.51 to 15.51  | No | ns |
| CTR 33 vs. HD 180 | -26      | -55.51 to 3.509  | No | ns |
| HD 60 vs. HD 71   | -8.85    | -36.84 to 19.14  | No | ns |
| HD 60 vs. HD 77   | 1        | -28.51 to 30.51  | No | ns |
| HD 60 vs. HD 109  | 0.25     | -29.26 to 29.76  | No | ns |
| HD 60 vs. HD 180  | -11.75   | -41.26 to 17.76  | No | ns |
| HD 71 vs. HD 77   | 9.85     | -18.14 to 37.84  | No | ns |
| HD 71 vs. HD 109  | 9.1      | -18.89 to 37.09  | No | ns |
| HD 71 vs. HD 180  | -2.9     | -30.89 to 25.09  | No | ns |
| HD 77 vs. HD 109  | -0.75    | -30.26 to 28.76  | No | ns |
| HD 77 vs. HD 180  | -12.75   | -42.26 to 16.76  | No | ns |
| HD 109 vs. HD 180 | -12      | -41.51 to 17.51  | No | ns |
| Day 42:           |          |                  |    |    |
| CTR 18 vs. CTR 21 | -3.714   | -13.10 to 5.669  | No | ns |
| CTR 18 vs. CTR 28 | -9.092   | -18.48 to 0.2921 | No | ns |
| CTR 18 vs. CTR 33 | -7.987   | -17.37 to 1.396  | No | ns |
| CTR 18 vs. HD 60  | -8.95    | -18.33 to 0.4339 | No | ns |
| CTR 18 vs. HD 71  | -4.671   | -14.05 to 4.713  | No | ns |
| CTR 18 vs. HD 77  | -0.04462 | -9.428 to 9.339  | No | ns |
| CTR 18 vs. HD 109 | -6.373   | -15.76 to 3.011  | No | ns |
| CTR 18 vs. HD 180 | -7.819   | -17.20 to 1.564  | No | ns |
| CTR 21 vs. CTR 28 | -5.377   | -14.76 to 4.006  | No | ns |
| CTR 21 vs. CTR 33 | -4.273   | -13.66 to 5.111  | No | ns |
| CTR 21 vs. HD 60  | -5.235   | -14.62 to 4.148  | No | ns |
| CTR 21 vs. HD 71  | -0.9563  | -10.34 to 8.427  | No | ns |
| CTR 21 vs. HD 77  | 3.67     | -5.714 to 13.05  | No | ns |
| CTR 21 vs. HD 109 | -2.659   | -12.04 to 6.725  | No | ns |
| CTR 21 vs. HD 180 | -4.105   | -13.49 to 5.279  | No | ns |
| CTR 28 vs. CTR 33 | 1.104    | -8.279 to 10.49  | No | ns |
| CTR 28 vs. HD 60  | 0.1418   | -9.242 to 9.525  | No | ns |
| CTR 28 vs. HD 71  | 4.421    | -4.963 to 13.80  | No | ns |
| CTR 28 vs. HD 77  | 9.047    | -0.3367 to 18.43 | No | ns |
| CTR 28 vs. HD 109 | 2.719    | -6.665 to 12.10  | No | ns |
| CTR 28 vs. HD 180 | 1.272    | -8.111 to 10.66  | No | ns |
| CTR 33 vs. HD 60  | -0.9626  | -10.35 to 8.421  | No | ns |
| CTR 33 vs. HD 71  | 3.316    | -6.067 to 12.70  | No | ns |
| CTR 33 vs. HD 77  | 7.943    | -1.441 to 17.33  | No | ns |
| CTR 33 vs. HD 109 | 1.614    | -7.769 to 11.00  | No | ns |
| CTR 33 vs. HD 180 | 0.168    | -9.216 to 9.552  | No | ns |
| HD 60 vs. HD 71   | 4.279    | -5.105 to 13.66  | No | ns |
| HD 60 vs. HD 77   | 8.905    | -0.4785 to 18.29 | No | ns |

|                   |          |                    |     |    |
|-------------------|----------|--------------------|-----|----|
| HD 60 vs. HD 109  | 2.577    | -6.807 to 11.96    | No  | ns |
| HD 60 vs. HD 180  | 1.131    | -8.253 to 10.51    | No  | ns |
| HD 71 vs. HD 77   | 4.626    | -4.758 to 14.01    | No  | ns |
| HD 71 vs. HD 109  | -1.702   | -11.09 to 7.681    | No  | ns |
| HD 71 vs. HD 180  | -3.148   | -12.53 to 6.235    | No  | ns |
| HD 77 vs. HD 109  | -6.328   | -15.71 to 3.055    | No  | ns |
| HD 77 vs. HD 180  | -7.775   | -17.16 to 1.609    | No  | ns |
| HD 109 vs. HD 180 | -1.446   | -10.83 to 7.937    | No  | ns |
| Day 56:           |          |                    |     |    |
| CTR 18 vs. CTR 21 | 0.9348   | -6.551 to 8.420    | No  | ns |
| CTR 18 vs. CTR 28 | -2.703   | -11.23 to 5.819    | No  | ns |
| CTR 18 vs. CTR 33 | 0.8736   | -6.329 to 8.076    | No  | ns |
| CTR 18 vs. HD 60  | 2.621    | -5.269 to 10.51    | No  | ns |
| CTR 18 vs. HD 71  | 1.261    | -6.224 to 8.746    | No  | ns |
| CTR 18 vs. HD 77  | -0.8148  | -8.300 to 6.671    | No  | ns |
| CTR 18 vs. HD 109 | -3.157   | -10.36 to 4.046    | No  | ns |
| CTR 18 vs. HD 180 | -4.91    | -12.39 to 2.576    | No  | ns |
| CTR 21 vs. CTR 28 | -3.638   | -11.79 to 4.511    | No  | ns |
| CTR 21 vs. CTR 33 | -0.06116 | -6.818 to 6.696    | No  | ns |
| CTR 21 vs. HD 60  | 1.686    | -5.799 to 9.172    | No  | ns |
| CTR 21 vs. HD 71  | 0.3262   | -6.731 to 7.383    | No  | ns |
| CTR 21 vs. HD 77  | -1.75    | -8.807 to 5.308    | No  | ns |
| CTR 21 vs. HD 109 | -4.092   | -10.85 to 2.665    | No  | ns |
| CTR 21 vs. HD 180 | -5.844   | -12.90 to 1.213    | No  | ns |
| CTR 28 vs. CTR 33 | 3.577    | -4.313 to 11.47    | No  | ns |
| CTR 28 vs. HD 60  | 5.325    | -3.198 to 13.85    | No  | ns |
| CTR 28 vs. HD 71  | 3.964    | -4.185 to 12.11    | No  | ns |
| CTR 28 vs. HD 77  | 1.889    | -6.260 to 10.04    | No  | ns |
| CTR 28 vs. HD 109 | -0.4538  | -8.344 to 7.436    | No  | ns |
| CTR 28 vs. HD 180 | -2.206   | -10.36 to 5.943    | No  | ns |
| CTR 33 vs. HD 60  | 1.748    | -5.455 to 8.950    | No  | ns |
| CTR 33 vs. HD 71  | 0.3874   | -6.369 to 7.144    | No  | ns |
| CTR 33 vs. HD 77  | -1.688   | -8.445 to 5.068    | No  | ns |
| CTR 33 vs. HD 109 | -4.031   | -10.47 to 2.412    | No  | ns |
| CTR 33 vs. HD 180 | -5.783   | -12.54 to 0.9736   | No  | ns |
| HD 60 vs. HD 71   | -1.36    | -8.846 to 6.125    | No  | ns |
| HD 60 vs. HD 77   | -3.436   | -10.92 to 4.049    | No  | ns |
| HD 60 vs. HD 109  | -5.778   | -12.98 to 1.424    | No  | ns |
| HD 60 vs. HD 180  | -7.531   | -15.02 to -0.04552 | Yes | *  |
| HD 71 vs. HD 77   | -2.076   | -9.133 to 4.981    | No  | ns |
| HD 71 vs. HD 109  | -4.418   | -11.17 to 2.339    | No  | ns |
| HD 71 vs. HD 180  | -6.171   | -13.23 to 0.8866   | No  | ns |

|                                                               |            |        |                  |              |         |
|---------------------------------------------------------------|------------|--------|------------------|--------------|---------|
| HD 77 vs. HD 109                                              |            | -2.342 | -9.099 to 4.414  | No           | ns      |
| HD 77 vs. HD 180                                              |            | -4.095 | -11.15 to 2.962  | No           | ns      |
| HD 109 vs. HD 180                                             |            | -1.752 | -8.509 to 5.004  | No           | ns      |
|                                                               |            |        |                  |              |         |
| <b>One-way ANOVA (between time points, within cell lines)</b> |            |        |                  |              |         |
| Bonferroni's multiple comparisons test                        | Mean Diff. |        | 95% CI of diff.  | Significant? | Summary |
|                                                               |            |        |                  |              |         |
| <b>CTR 18:</b>                                                |            |        |                  |              |         |
| Day 0 vs. Day 7                                               |            | 15.67  | -13.95 to 45.28  | No           | ns      |
| Day 0 vs. Day 14                                              |            | -8.667 | -38.28 to 20.95  | No           | ns      |
| Day 0 vs. Day 28                                              |            | 3.583  | -24.12 to 31.29  | No           | ns      |
| Day 0 vs. Day 42                                              |            | 20.72  | -8.895 to 50.34  | No           | ns      |
| Day 0 vs. Day 56                                              |            | 23.85  | -3.855 to 51.55  | No           | ns      |
| Day 7 vs. Day 14                                              |            | -24.33 | -53.95 to 5.284  | No           | ns      |
| Day 7 vs. Day 28                                              |            | -12.08 | -39.79 to 15.62  | No           | ns      |
| Day 7 vs. Day 42                                              |            | 5.056  | -24.56 to 34.67  | No           | ns      |
| Day 7 vs. Day 56                                              |            | 8.183  | -19.52 to 35.89  | No           | ns      |
| Day 14 vs. Day 28                                             |            | 12.25  | -15.45 to 39.95  | No           | ns      |
| Day 14 vs. Day 42                                             |            | 29.39  | -0.2279 to 59.01 | No           | ns      |
| Day 14 vs. Day 56                                             |            | 32.52  | 4.812 to 60.22   | Yes          | *       |
| Day 28 vs. Day 42                                             |            | 17.14  | -10.57 to 44.84  | No           | ns      |
| Day 28 vs. Day 56                                             |            | 20.27  | -5.383 to 45.92  | No           | ns      |
| Day 42 vs. Day 56                                             |            | 3.127  | -24.58 to 30.83  | No           | ns      |
|                                                               |            |        |                  |              |         |
| <b>CTR 21:</b>                                                |            |        |                  |              |         |
| Day 0 vs. Day 7                                               |            | 26.33  | -7.946 to 60.61  | No           | ns      |
| Day 0 vs. Day 14                                              |            | -6.333 | -40.61 to 27.95  | No           | ns      |
| Day 0 vs. Day 28                                              |            | 16     | -16.07 to 48.07  | No           | ns      |
| Day 0 vs. Day 42                                              |            | 25.68  | -8.604 to 59.96  | No           | ns      |
| Day 0 vs. Day 56                                              |            | 33.45  | 2.791 to 64.11   | Yes          | *       |
| Day 7 vs. Day 14                                              |            | -32.67 | -66.95 to 1.613  | No           | ns      |
| Day 7 vs. Day 28                                              |            | -10.33 | -42.40 to 21.73  | No           | ns      |
| Day 7 vs. Day 42                                              |            | -0.658 | -34.94 to 33.62  | No           | ns      |
| Day 7 vs. Day 56                                              |            | 7.118  | -23.54 to 37.78  | No           | ns      |
| Day 14 vs. Day 28                                             |            | 22.33  | -9.732 to 54.40  | No           | ns      |
| Day 14 vs. Day 42                                             |            | 32.01  | -2.271 to 66.29  | No           | ns      |
| Day 14 vs. Day 56                                             |            | 39.78  | 9.124 to 70.45   | Yes          | **      |
| Day 28 vs. Day 42                                             |            | 9.675  | -22.39 to 41.74  | No           | ns      |
| Day 28 vs. Day 56                                             |            | 17.45  | -10.71 to 45.62  | No           | ns      |
| Day 42 vs. Day 56                                             |            | 7.776  | -22.88 to 38.44  | No           | ns      |
|                                                               |            |        |                  |              |         |
| <b>CTR 28:</b>                                                |            |        |                  |              |         |
| Day 0 vs. Day 7                                               |            | 17.33  | 8.675 to 25.99   | Yes          | ***     |



|                   |         |                  |     |      |
|-------------------|---------|------------------|-----|------|
| Day 0 vs. Day 14  | 22.33   | 13.67 to 30.99   | Yes | **** |
| Day 0 vs. Day 28  | 26      | 17.90 to 34.10   | Yes | **** |
| Day 0 vs. Day 42  | 11.3    | 2.640 to 19.96   | Yes | **   |
| Day 0 vs. Day 56  | 20.81   | 12.15 to 29.47   | Yes | **** |
| Day 7 vs. Day 14  | 5       | -3.659 to 13.66  | No  | ns   |
| Day 7 vs. Day 28  | 8.667   | 0.5673 to 16.77  | Yes | *    |
| Day 7 vs. Day 42  | -6.035  | -14.69 to 2.623  | No  | ns   |
| Day 7 vs. Day 56  | 3.48    | -5.179 to 12.14  | No  | ns   |
| Day 14 vs. Day 28 | 3.667   | -4.433 to 11.77  | No  | ns   |
| Day 14 vs. Day 42 | -11.04  | -19.69 to -2.377 | Yes | **   |
| Day 14 vs. Day 56 | -1.52   | -10.18 to 7.139  | No  | ns   |
| Day 28 vs. Day 42 | -14.7   | -22.80 to -6.603 | Yes | ***  |
| Day 28 vs. Day 56 | -5.187  | -13.29 to 2.913  | No  | ns   |
| Day 42 vs. Day 56 | 9.515   | 0.8566 to 18.17  | Yes | *    |
| CTR 33:           |         |                  |     |      |
| Day 0 vs. Day 7   | 32.67   | 13.63 to 51.70   | Yes | ***  |
| Day 0 vs. Day 14  | 16      | -3.036 to 35.04  | No  | ns   |
| Day 0 vs. Day 28  | 33.83   | 16.03 to 51.64   | Yes | ***  |
| Day 0 vs. Day 42  | 25.74   | 6.700 to 44.77   | Yes | **   |
| Day 0 vs. Day 56  | 37.72   | 21.24 to 54.21   | Yes | **** |
| Day 7 vs. Day 14  | -16.67  | -35.70 to 2.369  | No  | ns   |
| Day 7 vs. Day 28  | 1.167   | -16.64 to 18.97  | No  | ns   |
| Day 7 vs. Day 42  | -6.931  | -25.97 to 12.10  | No  | ns   |
| Day 7 vs. Day 56  | 5.057   | -11.43 to 21.54  | No  | ns   |
| Day 14 vs. Day 28 | 17.83   | 0.02722 to 35.64 | Yes | *    |
| Day 14 vs. Day 42 | 9.736   | -9.300 to 28.77  | No  | ns   |
| Day 14 vs. Day 56 | 21.72   | 5.238 to 38.21   | Yes | **   |
| Day 28 vs. Day 42 | -8.097  | -25.90 to 9.709  | No  | ns   |
| Day 28 vs. Day 56 | 3.89    | -11.16 to 18.94  | No  | ns   |
| Day 42 vs. Day 56 | 11.99   | -4.498 to 28.47  | No  | ns   |
| HD 60:            |         |                  |     |      |
| Day 0 vs. Day 7   | 11      | -16.64 to 38.64  | No  | ns   |
| Day 0 vs. Day 14  | -0.3333 | -27.97 to 27.30  | No  | ns   |
| Day 0 vs. Day 28  | 4.583   | -21.27 to 30.44  | No  | ns   |
| Day 0 vs. Day 42  | 9.773   | -17.86 to 37.41  | No  | ns   |
| Day 0 vs. Day 56  | 24.47   | -1.380 to 50.32  | No  | ns   |
| Day 7 vs. Day 14  | -11.33  | -38.97 to 16.30  | No  | ns   |
| Day 7 vs. Day 28  | -6.417  | -32.27 to 19.44  | No  | ns   |
| Day 7 vs. Day 42  | -1.227  | -28.86 to 26.41  | No  | ns   |
| Day 7 vs. Day 56  | 13.47   | -12.38 to 39.32  | No  | ns   |
| Day 14 vs. Day 28 | 4.917   | -20.94 to 30.77  | No  | ns   |

|                   |  |        |                 |     |    |
|-------------------|--|--------|-----------------|-----|----|
| Day 14 vs. Day 42 |  | 10.11  | -17.53 to 37.74 | No  | ns |
| Day 14 vs. Day 56 |  | 24.8   | -1.047 to 50.66 | No  | ns |
| Day 28 vs. Day 42 |  | 5.19   | -20.66 to 31.04 | No  | ns |
| Day 28 vs. Day 56 |  | 19.89  | -4.046 to 43.82 | No  | ns |
| Day 42 vs. Day 56 |  | 14.7   | -11.15 to 40.55 | No  | ns |
| HD 71:            |  |        |                 |     |    |
| Day 0 vs. Day 7   |  | 27     | -17.91 to 71.91 | No  | ns |
| Day 0 vs. Day 14  |  | -5     | -49.91 to 39.91 | No  | ns |
| Day 0 vs. Day 28  |  | 2.4    | -37.77 to 42.57 | No  | ns |
| Day 0 vs. Day 42  |  | 20.72  | -24.19 to 65.63 | No  | ns |
| Day 0 vs. Day 56  |  | 29.78  | -10.39 to 69.95 | No  | ns |
| Day 7 vs. Day 14  |  | -32    | -76.91 to 12.91 | No  | ns |
| Day 7 vs. Day 28  |  | -24.6  | -64.77 to 15.57 | No  | ns |
| Day 7 vs. Day 42  |  | -6.281 | -51.19 to 38.63 | No  | ns |
| Day 7 vs. Day 56  |  | 2.778  | -37.39 to 42.95 | No  | ns |
| Day 14 vs. Day 28 |  | 7.4    | -32.77 to 47.57 | No  | ns |
| Day 14 vs. Day 42 |  | 25.72  | -19.19 to 70.63 | No  | ns |
| Day 14 vs. Day 56 |  | 34.78  | -5.391 to 74.95 | No  | ns |
| Day 28 vs. Day 42 |  | 18.32  | -21.85 to 58.49 | No  | ns |
| Day 28 vs. Day 56 |  | 27.38  | -7.410 to 62.17 | No  | ns |
| Day 42 vs. Day 56 |  | 9.059  | -31.11 to 49.23 | No  | ns |
| HD 77:            |  |        |                 |     |    |
| Day 0 vs. Day 7   |  | 4.333  | -25.28 to 33.94 | No  | ns |
| Day 0 vs. Day 14  |  | -10.33 | -39.94 to 19.28 | No  | ns |
| Day 0 vs. Day 28  |  | 6.917  | -20.78 to 34.62 | No  | ns |
| Day 0 vs. Day 42  |  | 20.01  | -9.599 to 49.62 | No  | ns |
| Day 0 vs. Day 56  |  | 22.37  | -4.116 to 48.85 | No  | ns |
| Day 7 vs. Day 14  |  | -14.67 | -44.28 to 14.94 | No  | ns |
| Day 7 vs. Day 28  |  | 2.583  | -25.12 to 30.28 | No  | ns |
| Day 7 vs. Day 42  |  | 15.68  | -13.93 to 45.29 | No  | ns |
| Day 7 vs. Day 56  |  | 18.04  | -8.450 to 44.52 | No  | ns |
| Day 14 vs. Day 28 |  | 17.25  | -10.45 to 44.95 | No  | ns |
| Day 14 vs. Day 42 |  | 30.35  | 0.7340 to 59.96 | Yes | *  |
| Day 14 vs. Day 56 |  | 32.7   | 6.217 to 59.19  | Yes | ** |
| Day 28 vs. Day 42 |  | 13.1   | -14.60 to 40.79 | No  | ns |
| Day 28 vs. Day 56 |  | 15.45  | -8.876 to 39.78 | No  | ns |
| Day 42 vs. Day 56 |  | 2.357  | -24.13 to 28.84 | No  | ns |
| HD 109:           |  |        |                 |     |    |
| Day 0 vs. Day 7   |  | 7.333  | -13.05 to 27.72 | No  | ns |
| Day 0 vs. Day 14  |  | 2.667  | -17.72 to 23.05 | No  | ns |

|                   |        |                  |     |    |
|-------------------|--------|------------------|-----|----|
| Day 0 vs. Day 28  | 5.833  | -13.23 to 24.90  | No  | ns |
| Day 0 vs. Day 42  | 13.35  | -7.035 to 33.74  | No  | ns |
| Day 0 vs. Day 56  | 19.69  | 2.039 to 37.35   | Yes | *  |
| Day 7 vs. Day 14  | -4.667 | -25.05 to 15.72  | No  | ns |
| Day 7 vs. Day 28  | -1.5   | -20.57 to 17.57  | No  | ns |
| Day 7 vs. Day 42  | 6.017  | -14.37 to 26.40  | No  | ns |
| Day 7 vs. Day 56  | 12.36  | -5.294 to 30.01  | No  | ns |
| Day 14 vs. Day 28 | 3.167  | -15.90 to 22.23  | No  | ns |
| Day 14 vs. Day 42 | 10.68  | -9.701 to 31.07  | No  | ns |
| Day 14 vs. Day 56 | 17.03  | -0.6276 to 34.68 | No  | ns |
| Day 28 vs. Day 42 | 7.517  | -11.55 to 26.59  | No  | ns |
| Day 28 vs. Day 56 | 13.86  | -2.256 to 29.98  | No  | ns |
| Day 42 vs. Day 56 | 6.343  | -11.31 to 24.00  | No  | ns |

|                   |        |                   |     |    |
|-------------------|--------|-------------------|-----|----|
| <b>HD 180:</b>    |        |                   |     |    |
| Day 0 vs. Day 7   | 10     | -17.25 to 37.25   | No  | ns |
| Day 0 vs. Day 14  | -15.33 | -42.59 to 11.92   | No  | ns |
| Day 0 vs. Day 28  | -6.167 | -31.66 to 19.33   | No  | ns |
| Day 0 vs. Day 42  | 11.9   | -15.35 to 39.16   | No  | ns |
| Day 0 vs. Day 56  | 17.94  | -6.435 to 42.32   | No  | ns |
| Day 7 vs. Day 14  | -25.33 | -52.59 to 1.919   | No  | ns |
| Day 7 vs. Day 28  | -16.17 | -41.66 to 9.326   | No  | ns |
| Day 7 vs. Day 42  | 1.904  | -25.35 to 29.16   | No  | ns |
| Day 7 vs. Day 56  | 7.94   | -16.44 to 32.32   | No  | ns |
| Day 14 vs. Day 28 | 9.167  | -16.33 to 34.66   | No  | ns |
| Day 14 vs. Day 42 | 27.24  | -0.01552 to 54.49 | No  | ns |
| Day 14 vs. Day 56 | 33.27  | 8.898 to 57.65    | Yes | ** |
| Day 28 vs. Day 42 | 18.07  | -7.422 to 43.56   | No  | ns |
| Day 28 vs. Day 56 | 24.11  | 1.717 to 46.50    | Yes | *  |
| Day 42 vs. Day 56 | 6.037  | -18.34 to 30.41   | No  | ns |

**Map2ab**

|                                                              |                 |                 |                        |         |
|--------------------------------------------------------------|-----------------|-----------------|------------------------|---------|
| <b>Two-way ANOVA</b>                                         |                 |                 |                        |         |
| Source of Variation                                          | P value summary | Significant?    |                        |         |
| Interaction                                                  | ***             | Yes             |                        |         |
| Column Factor                                                | ****            | Yes             |                        |         |
| Row Factor                                                   | ****            | Yes             |                        |         |
| <b>One-way ANOVA (between cell lines, within time point)</b> |                 |                 |                        |         |
| Bonferroni's Multiple Comparison Test                        | Mean Diff.      | t               | Significant? P < 0.05? | Summary |
| Day 0:                                                       |                 |                 |                        |         |
| CTR 18 vs. CTR 21                                            | -0.3333         | -6.022 to 5.355 | No                     | ns      |

|                   |         |                  |     |    |
|-------------------|---------|------------------|-----|----|
| CTR 18 vs. CTR 28 | 2.667   | -3.022 to 8.355  | No  | ns |
| CTR 18 vs. CTR 33 | 2.667   | -3.022 to 8.355  | No  | ns |
| CTR 18 vs. HD 60  | 0       | -5.688 to 5.688  | No  | ns |
| CTR 18 vs. HD 71  | 2.333   | -3.355 to 8.022  | No  | ns |
| CTR 18 vs. HD 77  | 2.667   | -3.022 to 8.355  | No  | ns |
| CTR 18 vs. HD 109 | 2.333   | -3.355 to 8.022  | No  | ns |
| CTR 18 vs. HD 180 | 2.333   | -3.355 to 8.022  | No  | ns |
| CTR 21 vs. CTR 28 | 3       | -2.688 to 8.688  | No  | ns |
| CTR 21 vs. CTR 33 | 3       | -2.688 to 8.688  | No  | ns |
| CTR 21 vs. HD 60  | 0.3333  | -5.355 to 6.022  | No  | ns |
| CTR 21 vs. HD 71  | 2.667   | -3.022 to 8.355  | No  | ns |
| CTR 21 vs. HD 77  | 3       | -2.688 to 8.688  | No  | ns |
| CTR 21 vs. HD 109 | 2.667   | -3.022 to 8.355  | No  | ns |
| CTR 21 vs. HD 180 | 2.667   | -3.022 to 8.355  | No  | ns |
| CTR 28 vs. CTR 33 | 0       | -5.688 to 5.688  | No  | ns |
| CTR 28 vs. HD 60  | -2.667  | -8.355 to 3.022  | No  | ns |
| CTR 28 vs. HD 71  | -0.3333 | -6.022 to 5.355  | No  | ns |
| CTR 28 vs. HD 77  | 0       | -5.688 to 5.688  | No  | ns |
| CTR 28 vs. HD 109 | -0.3333 | -6.022 to 5.355  | No  | ns |
| CTR 28 vs. HD 180 | -0.3333 | -6.022 to 5.355  | No  | ns |
| CTR 33 vs. HD 60  | -2.667  | -8.355 to 3.022  | No  | ns |
| CTR 33 vs. HD 71  | -0.3333 | -6.022 to 5.355  | No  | ns |
| CTR 33 vs. HD 77  | 0       | -5.688 to 5.688  | No  | ns |
| CTR 33 vs. HD 109 | -0.3333 | -6.022 to 5.355  | No  | ns |
| CTR 33 vs. HD 180 | -0.3333 | -6.022 to 5.355  | No  | ns |
| HD 60 vs. HD 71   | 2.333   | -3.355 to 8.022  | No  | ns |
| HD 60 vs. HD 77   | 2.667   | -3.022 to 8.355  | No  | ns |
| HD 60 vs. HD 109  | 2.333   | -3.355 to 8.022  | No  | ns |
| HD 60 vs. HD 180  | 2.333   | -3.355 to 8.022  | No  | ns |
| HD 71 vs. HD 77   | 0.3333  | -5.355 to 6.022  | No  | ns |
| HD 71 vs. HD 109  | 0       | -5.688 to 5.688  | No  | ns |
| HD 71 vs. HD 180  | 0       | -5.688 to 5.688  | No  | ns |
| HD 77 vs. HD 109  | -0.3333 | -6.022 to 5.355  | No  | ns |
| HD 77 vs. HD 180  | -0.3333 | -6.022 to 5.355  | No  | ns |
| HD 109 vs. HD 180 | 0       | -5.688 to 5.688  | No  | ns |
|                   |         |                  |     |    |
| Day 7:            |         |                  |     |    |
| CTR 18 vs. CTR 21 | 6       | -0.6307 to 12.63 | No  | ns |
| CTR 18 vs. CTR 28 | 7.667   | 1.036 to 14.30   | Yes | *  |
| CTR 18 vs. CTR 33 | 7       | 0.3693 to 13.63  | Yes | *  |
| CTR 18 vs. HD 60  | -2      | -8.631 to 4.631  | No  | ns |
| CTR 18 vs. HD 71  | 5.667   | -0.9640 to 12.30 | No  | ns |
| CTR 18 vs. HD 77  | 0.6667  | -5.964 to 7.297  | No  | ns |

|                   |         |                   |     |    |
|-------------------|---------|-------------------|-----|----|
| CTR 18 vs. HD 109 | 4.333   | -2.297 to 10.96   | No  | ns |
| CTR 18 vs. HD 180 | 2.667   | -3.964 to 9.297   | No  | ns |
| CTR 21 vs. CTR 28 | 1.667   | -4.964 to 8.297   | No  | ns |
| CTR 21 vs. CTR 33 | 1       | -5.631 to 7.631   | No  | ns |
| CTR 21 vs. HD 60  | -8      | -14.63 to -1.369  | Yes | ** |
| CTR 21 vs. HD 71  | -0.3333 | -6.964 to 6.297   | No  | ns |
| CTR 21 vs. HD 77  | -5.333  | -11.96 to 1.297   | No  | ns |
| CTR 21 vs. HD 109 | -1.667  | -8.297 to 4.964   | No  | ns |
| CTR 21 vs. HD 180 | -3.333  | -9.964 to 3.297   | No  | ns |
| CTR 28 vs. CTR 33 | -0.6667 | -7.297 to 5.964   | No  | ns |
| CTR 28 vs. HD 60  | -9.667  | -16.30 to -3.036  | Yes | ** |
| CTR 28 vs. HD 71  | -2      | -8.631 to 4.631   | No  | ns |
| CTR 28 vs. HD 77  | -7      | -13.63 to -0.3693 | Yes | *  |
| CTR 28 vs. HD 109 | -3.333  | -9.964 to 3.297   | No  | ns |
| CTR 28 vs. HD 180 | -5      | -11.63 to 1.631   | No  | ns |
| CTR 33 vs. HD 60  | -9      | -15.63 to -2.369  | Yes | ** |
| CTR 33 vs. HD 71  | -1.333  | -7.964 to 5.297   | No  | ns |
| CTR 33 vs. HD 77  | -6.333  | -12.96 to 0.2973  | No  | ns |
| CTR 33 vs. HD 109 | -2.667  | -9.297 to 3.964   | No  | ns |
| CTR 33 vs. HD 180 | -4.333  | -10.96 to 2.297   | No  | ns |
| HD 60 vs. HD 71   | 7.667   | 1.036 to 14.30    | Yes | *  |
| HD 60 vs. HD 77   | 2.667   | -3.964 to 9.297   | No  | ns |
| HD 60 vs. HD 109  | 6.333   | -0.2973 to 12.96  | No  | ns |
| HD 60 vs. HD 180  | 4.667   | -1.964 to 11.30   | No  | ns |
| HD 71 vs. HD 77   | -5      | -11.63 to 1.631   | No  | ns |
| HD 71 vs. HD 109  | -1.333  | -7.964 to 5.297   | No  | ns |
| HD 71 vs. HD 180  | -3      | -9.631 to 3.631   | No  | ns |
| HD 77 vs. HD 109  | 3.667   | -2.964 to 10.30   | No  | ns |
| HD 77 vs. HD 180  | 2       | -4.631 to 8.631   | No  | ns |
| HD 109 vs. HD 180 | -1.667  | -8.297 to 4.964   | No  | ns |
| Day 14:           |         |                   |     |    |
| CTR 18 vs. CTR 21 | -4      | -19.16 to 11.16   | No  | ns |
| CTR 18 vs. CTR 28 | 15.33   | 0.1783 to 30.49   | Yes | *  |
| CTR 18 vs. CTR 33 | 5.333   | -9.822 to 20.49   | No  | ns |
| CTR 18 vs. HD 60  | 7.667   | -7.488 to 22.82   | No  | ns |
| CTR 18 vs. HD 71  | -2.667  | -17.82 to 12.49   | No  | ns |
| CTR 18 vs. HD 77  | 4.333   | -10.82 to 19.49   | No  | ns |
| CTR 18 vs. HD 109 | 1       | -14.16 to 16.16   | No  | ns |
| CTR 18 vs. HD 180 | 6       | -9.155 to 21.16   | No  | ns |
| CTR 21 vs. CTR 28 | 19.33   | 4.178 to 34.49    | Yes | ** |
| CTR 21 vs. CTR 33 | 9.333   | -5.822 to 24.49   | No  | ns |
| CTR 21 vs. HD 60  | 11.67   | -3.488 to 26.82   | No  | ns |

|                   |        |                  |     |    |
|-------------------|--------|------------------|-----|----|
| CTR 21 vs. HD 71  | 1.333  | -13.82 to 16.49  | No  | ns |
| CTR 21 vs. HD 77  | 8.333  | -6.822 to 23.49  | No  | ns |
| CTR 21 vs. HD 109 | 5      | -10.16 to 20.16  | No  | ns |
| CTR 21 vs. HD 180 | 10     | -5.155 to 25.16  | No  | ns |
| CTR 28 vs. CTR 33 | -10    | -25.16 to 5.155  | No  | ns |
| CTR 28 vs. HD 60  | -7.667 | -22.82 to 7.488  | No  | ns |
| CTR 28 vs. HD 71  | -18    | -33.16 to -2.845 | Yes | *  |
| CTR 28 vs. HD 77  | -11    | -26.16 to 4.155  | No  | ns |
| CTR 28 vs. HD 109 | -14.33 | -29.49 to 0.8217 | No  | ns |
| CTR 28 vs. HD 180 | -9.333 | -24.49 to 5.822  | No  | ns |
| CTR 33 vs. HD 60  | 2.333  | -12.82 to 17.49  | No  | ns |
| CTR 33 vs. HD 71  | -8     | -23.16 to 7.155  | No  | ns |
| CTR 33 vs. HD 77  | -1     | -16.16 to 14.16  | No  | ns |
| CTR 33 vs. HD 109 | -4.333 | -19.49 to 10.82  | No  | ns |
| CTR 33 vs. HD 180 | 0.6667 | -14.49 to 15.82  | No  | ns |
| HD 60 vs. HD 71   | -10.33 | -25.49 to 4.822  | No  | ns |
| HD 60 vs. HD 77   | -3.333 | -18.49 to 11.82  | No  | ns |
| HD 60 vs. HD 109  | -6.667 | -21.82 to 8.488  | No  | ns |
| HD 60 vs. HD 180  | -1.667 | -16.82 to 13.49  | No  | ns |
| HD 71 vs. HD 77   | 7      | -8.155 to 22.16  | No  | ns |
| HD 71 vs. HD 109  | 3.667  | -11.49 to 18.82  | No  | ns |
| HD 71 vs. HD 180  | 8.667  | -6.488 to 23.82  | No  | ns |
| HD 77 vs. HD 109  | -3.333 | -18.49 to 11.82  | No  | ns |
| HD 77 vs. HD 180  | 1.667  | -13.49 to 16.82  | No  | ns |
| HD 109 vs. HD 180 | 5      | -10.16 to 20.16  | No  | ns |
| Day 28:           |        |                  |     |    |
| CTR 18 vs. CTR 21 | -8     | -35.27 to 19.27  | No  | ns |
| CTR 18 vs. CTR 28 | 16     | -11.27 to 43.27  | No  | ns |
| CTR 18 vs. CTR 33 | 9      | -18.27 to 36.27  | No  | ns |
| CTR 18 vs. HD 60  | 16     | -11.27 to 43.27  | No  | ns |
| CTR 18 vs. HD 71  | -14.2  | -40.07 to 11.67  | No  | ns |
| CTR 18 vs. HD 77  | 1      | -26.27 to 28.27  | No  | ns |
| CTR 18 vs. HD 109 | -7.75  | -35.02 to 19.52  | No  | ns |
| CTR 18 vs. HD 180 | 8.75   | -18.52 to 36.02  | No  | ns |
| CTR 21 vs. CTR 28 | 24     | -3.267 to 51.27  | No  | ns |
| CTR 21 vs. CTR 33 | 17     | -10.27 to 44.27  | No  | ns |
| CTR 21 vs. HD 60  | 24     | -3.267 to 51.27  | No  | ns |
| CTR 21 vs. HD 71  | -6.2   | -32.07 to 19.67  | No  | ns |
| CTR 21 vs. HD 77  | 9      | -18.27 to 36.27  | No  | ns |
| CTR 21 vs. HD 109 | 0.25   | -27.02 to 27.52  | No  | ns |
| CTR 21 vs. HD 180 | 16.75  | -10.52 to 44.02  | No  | ns |
| CTR 28 vs. CTR 33 | -7     | -34.27 to 20.27  | No  | ns |

|                   |         |                  |     |    |
|-------------------|---------|------------------|-----|----|
| CTR 28 vs. HD 60  | 0       | -27.27 to 27.27  | No  | ns |
| CTR 28 vs. HD 71  | -30.2   | -56.07 to -4.332 | Yes | *  |
| CTR 28 vs. HD 77  | -15     | -42.27 to 12.27  | No  | ns |
| CTR 28 vs. HD 109 | -23.75  | -51.02 to 3.517  | No  | ns |
| CTR 28 vs. HD 180 | -7.25   | -34.52 to 20.02  | No  | ns |
| CTR 33 vs. HD 60  | 7       | -20.27 to 34.27  | No  | ns |
| CTR 33 vs. HD 71  | -23.2   | -49.07 to 2.668  | No  | ns |
| CTR 33 vs. HD 77  | -8      | -35.27 to 19.27  | No  | ns |
| CTR 33 vs. HD 109 | -16.75  | -44.02 to 10.52  | No  | ns |
| CTR 33 vs. HD 180 | -0.25   | -27.52 to 27.02  | No  | ns |
| HD 60 vs. HD 71   | -30.2   | -56.07 to -4.332 | Yes | *  |
| HD 60 vs. HD 77   | -15     | -42.27 to 12.27  | No  | ns |
| HD 60 vs. HD 109  | -23.75  | -51.02 to 3.517  | No  | ns |
| HD 60 vs. HD 180  | -7.25   | -34.52 to 20.02  | No  | ns |
| HD 71 vs. HD 77   | 15.2    | -10.67 to 41.07  | No  | ns |
| HD 71 vs. HD 109  | 6.45    | -19.42 to 32.32  | No  | ns |
| HD 71 vs. HD 180  | 22.95   | -2.918 to 48.82  | No  | ns |
| HD 77 vs. HD 109  | -8.75   | -36.02 to 18.52  | No  | ns |
| HD 77 vs. HD 180  | 7.75    | -19.52 to 35.02  | No  | ns |
| HD 109 vs. HD 180 | 16.5    | -10.77 to 43.77  | No  | ns |
| Day 42:           |         |                  |     |    |
| CTR 18 vs. CTR 21 | -2.998  | -16.29 to 10.29  | No  | ns |
| CTR 18 vs. CTR 28 | -4.285  | -17.58 to 9.007  | No  | ns |
| CTR 18 vs. CTR 33 | -1.212  | -14.50 to 12.08  | No  | ns |
| CTR 18 vs. HD 60  | -2.954  | -16.25 to 10.34  | No  | ns |
| CTR 18 vs. HD 71  | -4.075  | -17.37 to 9.217  | No  | ns |
| CTR 18 vs. HD 77  | -0.929  | -14.22 to 12.36  | No  | ns |
| CTR 18 vs. HD 109 | 1.261   | -12.03 to 14.55  | No  | ns |
| CTR 18 vs. HD 180 | -1.028  | -14.32 to 12.26  | No  | ns |
| CTR 21 vs. CTR 28 | -1.287  | -14.58 to 12.01  | No  | ns |
| CTR 21 vs. CTR 33 | 1.786   | -11.51 to 15.08  | No  | ns |
| CTR 21 vs. HD 60  | 0.04397 | -13.25 to 13.34  | No  | ns |
| CTR 21 vs. HD 71  | -1.078  | -14.37 to 12.21  | No  | ns |
| CTR 21 vs. HD 77  | 2.069   | -11.22 to 15.36  | No  | ns |
| CTR 21 vs. HD 109 | 4.258   | -9.034 to 17.55  | No  | ns |
| CTR 21 vs. HD 180 | 1.97    | -11.32 to 15.26  | No  | ns |
| CTR 28 vs. CTR 33 | 3.073   | -10.22 to 16.36  | No  | ns |
| CTR 28 vs. HD 60  | 1.331   | -11.96 to 14.62  | No  | ns |
| CTR 28 vs. HD 71  | 0.2091  | -13.08 to 13.50  | No  | ns |
| CTR 28 vs. HD 77  | 3.356   | -9.936 to 16.65  | No  | ns |
| CTR 28 vs. HD 109 | 5.545   | -7.747 to 18.84  | No  | ns |
| CTR 28 vs. HD 180 | 3.256   | -10.04 to 16.55  | No  | ns |

|                   |          |                 |    |    |
|-------------------|----------|-----------------|----|----|
| CTR 33 vs. HD 60  | -1.742   | -15.03 to 11.55 | No | ns |
| CTR 33 vs. HD 71  | -2.864   | -16.16 to 10.43 | No | ns |
| CTR 33 vs. HD 77  | 0.2826   | -13.01 to 13.57 | No | ns |
| CTR 33 vs. HD 109 | 2.472    | -10.82 to 15.76 | No | ns |
| CTR 33 vs. HD 180 | 0.1835   | -13.11 to 13.48 | No | ns |
| HD 60 vs. HD 71   | -1.122   | -14.41 to 12.17 | No | ns |
| HD 60 vs. HD 77   | 2.025    | -11.27 to 15.32 | No | ns |
| HD 60 vs. HD 109  | 4.214    | -9.078 to 17.51 | No | ns |
| HD 60 vs. HD 180  | 1.926    | -11.37 to 15.22 | No | ns |
| HD 71 vs. HD 77   | 3.146    | -10.15 to 16.44 | No | ns |
| HD 71 vs. HD 109  | 5.336    | -7.956 to 18.63 | No | ns |
| HD 71 vs. HD 180  | 3.047    | -10.24 to 16.34 | No | ns |
| HD 77 vs. HD 109  | 2.19     | -11.10 to 15.48 | No | ns |
| HD 77 vs. HD 180  | -0.09912 | -13.39 to 13.19 | No | ns |
| HD 109 vs. HD 180 | -2.289   | -15.58 to 11.00 | No | ns |
| Day 56:           |          |                 |    |    |
| CTR 18 vs. CTR 21 | 0.6564   | -15.22 to 16.53 | No | ns |
| CTR 18 vs. CTR 28 | 5.135    | -12.61 to 22.88 | No | ns |
| CTR 18 vs. CTR 33 | -3.307   | -21.06 to 14.44 | No | ns |
| CTR 18 vs. HD 60  | 3.693    | -14.06 to 21.44 | No | ns |
| CTR 18 vs. HD 71  | -4.771   | -22.52 to 12.98 | No | ns |
| CTR 18 vs. HD 77  | -5.974   | -23.72 to 11.77 | No | ns |
| CTR 18 vs. HD 109 | -1.405   | -18.01 to 15.20 | No | ns |
| CTR 18 vs. HD 180 | 4.703    | -13.05 to 22.45 | No | ns |
| CTR 21 vs. CTR 28 | 4.479    | -11.40 to 20.35 | No | ns |
| CTR 21 vs. CTR 33 | -3.964   | -19.84 to 11.91 | No | ns |
| CTR 21 vs. HD 60  | 3.036    | -12.84 to 18.91 | No | ns |
| CTR 21 vs. HD 71  | -5.427   | -21.30 to 10.45 | No | ns |
| CTR 21 vs. HD 77  | -6.63    | -22.50 to 9.244 | No | ns |
| CTR 21 vs. HD 109 | -2.062   | -16.64 to 12.52 | No | ns |
| CTR 21 vs. HD 180 | 4.046    | -11.83 to 19.92 | No | ns |
| CTR 28 vs. CTR 33 | -8.442   | -26.19 to 9.306 | No | ns |
| CTR 28 vs. HD 60  | -1.442   | -19.19 to 16.31 | No | ns |
| CTR 28 vs. HD 71  | -9.906   | -27.65 to 7.842 | No | ns |
| CTR 28 vs. HD 77  | -11.11   | -28.86 to 6.639 | No | ns |
| CTR 28 vs. HD 109 | -6.541   | -23.14 to 10.06 | No | ns |
| CTR 28 vs. HD 180 | -0.4325  | -18.18 to 17.32 | No | ns |
| CTR 33 vs. HD 60  | 7        | -10.75 to 24.75 | No | ns |
| CTR 33 vs. HD 71  | -1.463   | -19.21 to 16.28 | No | ns |
| CTR 33 vs. HD 77  | -2.667   | -20.41 to 15.08 | No | ns |
| CTR 33 vs. HD 109 | 1.902    | -14.70 to 18.50 | No | ns |
| CTR 33 vs. HD 180 | 8.01     | -9.738 to 25.76 | No | ns |



|                                                               |            |         |                   |              |         |
|---------------------------------------------------------------|------------|---------|-------------------|--------------|---------|
| HD 60 vs. HD 71                                               |            | -8.463  | -26.21 to 9.285   | No           | ns      |
| HD 60 vs. HD 77                                               |            | -9.667  | -27.41 to 8.082   | No           | ns      |
| HD 60 vs. HD 109                                              |            | -5.098  | -21.70 to 11.50   | No           | ns      |
| HD 60 vs. HD 180                                              |            | 1.01    | -16.74 to 18.76   | No           | ns      |
| HD 71 vs. HD 77                                               |            | -1.203  | -18.95 to 16.54   | No           | ns      |
| HD 71 vs. HD 109                                              |            | 3.365   | -13.24 to 19.97   | No           | ns      |
| HD 71 vs. HD 180                                              |            | 9.473   | -8.275 to 27.22   | No           | ns      |
| HD 77 vs. HD 109                                              |            | 4.569   | -12.03 to 21.17   | No           | ns      |
| HD 77 vs. HD 180                                              |            | 10.68   | -7.072 to 28.42   | No           | ns      |
| HD 109 vs. HD 180                                             |            | 6.108   | -10.49 to 22.71   | No           | ns      |
| <b>One-way ANOVA (between time points, within cell lines)</b> |            |         |                   |              |         |
| Bonferroni's multiple comparisons test                        | Mean Diff. |         | 95% CI of diff.   | Significant? | Summary |
| <b>CTR 18:</b>                                                |            |         |                   |              |         |
| Day 0 vs. Day 7                                               |            | -5      | -18.40 to 8.400   | No           | ns      |
| Day 0 vs. Day 14                                              |            | -12.67  | -26.07 to 0.7337  | No           | ns      |
| Day 0 vs. Day 28                                              |            | -13.33  | -25.87 to -0.7985 | Yes          | *       |
| Day 0 vs. Day 42                                              |            | -11.34  | -24.74 to 2.061   | No           | ns      |
| Day 0 vs. Day 56                                              |            | -4.026  | -17.43 to 9.374   | No           | ns      |
| Day 7 vs. Day 14                                              |            | -7.667  | -21.07 to 5.734   | No           | ns      |
| Day 7 vs. Day 28                                              |            | -8.333  | -20.87 to 4.202   | No           | ns      |
| Day 7 vs. Day 42                                              |            | -6.339  | -19.74 to 7.061   | No           | ns      |
| Day 7 vs. Day 56                                              |            | 0.974   | -12.43 to 14.37   | No           | ns      |
| Day 14 vs. Day 28                                             |            | -0.6667 | -13.20 to 11.87   | No           | ns      |
| Day 14 vs. Day 42                                             |            | 1.327   | -12.07 to 14.73   | No           | ns      |
| Day 14 vs. Day 56                                             |            | 8.641   | -4.760 to 22.04   | No           | ns      |
| Day 28 vs. Day 42                                             |            | 1.994   | -10.54 to 14.53   | No           | ns      |
| Day 28 vs. Day 56                                             |            | 9.307   | -3.228 to 21.84   | No           | ns      |
| Day 42 vs. Day 56                                             |            | 7.313   | -6.087 to 20.71   | No           | ns      |
| <b>CTR 21:</b>                                                |            |         |                   |              |         |
| Day 0 vs. Day 7                                               |            | 1.333   | -23.56 to 26.23   | No           | ns      |
| Day 0 vs. Day 14                                              |            | -16.33  | -41.23 to 8.562   | No           | ns      |
| Day 0 vs. Day 28                                              |            | -21     | -44.29 to 2.288   | No           | ns      |
| Day 0 vs. Day 42                                              |            | -14     | -38.90 to 10.89   | No           | ns      |
| Day 0 vs. Day 56                                              |            | -3.036  | -25.30 to 19.23   | No           | ns      |
| Day 7 vs. Day 14                                              |            | -17.67  | -42.56 to 7.229   | No           | ns      |
| Day 7 vs. Day 28                                              |            | -22.33  | -45.62 to 0.9544  | No           | ns      |
| Day 7 vs. Day 42                                              |            | -15.34  | -40.23 to 9.558   | No           | ns      |
| Day 7 vs. Day 56                                              |            | -4.37   | -26.64 to 17.90   | No           | ns      |
| Day 14 vs. Day 28                                             |            | -4.667  | -27.95 to 18.62   | No           | ns      |
| Day 14 vs. Day 42                                             |            | 2.329   | -22.57 to 27.23   | No           | ns      |

|                   |  |         |                  |     |      |
|-------------------|--|---------|------------------|-----|------|
| Day 14 vs. Day 56 |  | 13.3    | -8.970 to 35.56  | No  | ns   |
| Day 28 vs. Day 42 |  | 6.996   | -16.29 to 30.28  | No  | ns   |
| Day 28 vs. Day 56 |  | 17.96   | -2.490 to 38.42  | No  | ns   |
| Day 42 vs. Day 56 |  | 10.97   | -11.30 to 33.23  | No  | ns   |
| CTR 28:           |  |         |                  |     |      |
| Day 0 vs. Day 7   |  | 0       | -8.843 to 8.843  | No  | ns   |
| Day 0 vs. Day 14  |  | 0       | -8.843 to 8.843  | No  | ns   |
| Day 0 vs. Day 28  |  | 0       | -8.272 to 8.272  | No  | ns   |
| Day 0 vs. Day 42  |  | -18.29  | -27.13 to -9.448 | Yes | **** |
| Day 0 vs. Day 56  |  | -1.558  | -10.40 to 7.285  | No  | ns   |
| Day 7 vs. Day 14  |  | 0       | -8.843 to 8.843  | No  | ns   |
| Day 7 vs. Day 28  |  | 0       | -8.272 to 8.272  | No  | ns   |
| Day 7 vs. Day 42  |  | -18.29  | -27.13 to -9.448 | Yes | **** |
| Day 7 vs. Day 56  |  | -1.558  | -10.40 to 7.285  | No  | ns   |
| Day 14 vs. Day 28 |  | 0       | -8.272 to 8.272  | No  | ns   |
| Day 14 vs. Day 42 |  | -18.29  | -27.13 to -9.448 | Yes | **** |
| Day 14 vs. Day 56 |  | -1.558  | -10.40 to 7.285  | No  | ns   |
| Day 28 vs. Day 42 |  | -18.29  | -26.56 to -10.02 | Yes | **** |
| Day 28 vs. Day 56 |  | -1.558  | -9.829 to 6.714  | No  | ns   |
| Day 42 vs. Day 56 |  | 16.73   | 7.890 to 25.58   | Yes | ***  |
| CTR 33:           |  |         |                  |     |      |
| Day 0 vs. Day 7   |  | -0.6667 | -13.94 to 12.61  | No  | ns   |
| Day 0 vs. Day 14  |  | -10     | -23.28 to 3.278  | No  | ns   |
| Day 0 vs. Day 28  |  | -7      | -19.42 to 5.420  | No  | ns   |
| Day 0 vs. Day 42  |  | -15.22  | -28.50 to -1.940 | Yes | *    |
| Day 0 vs. Day 56  |  | -10     | -23.28 to 3.278  | No  | ns   |
| Day 7 vs. Day 14  |  | -9.333  | -22.61 to 3.944  | No  | ns   |
| Day 7 vs. Day 28  |  | -6.333  | -18.75 to 6.087  | No  | ns   |
| Day 7 vs. Day 42  |  | -14.55  | -27.83 to -1.273 | Yes | *    |
| Day 7 vs. Day 56  |  | -9.333  | -22.61 to 3.944  | No  | ns   |
| Day 14 vs. Day 28 |  | 3       | -9.420 to 15.42  | No  | ns   |
| Day 14 vs. Day 42 |  | -5.218  | -18.50 to 8.060  | No  | ns   |
| Day 14 vs. Day 56 |  | 0       | -13.28 to 13.28  | No  | ns   |
| Day 28 vs. Day 42 |  | -8.218  | -20.64 to 4.202  | No  | ns   |
| Day 28 vs. Day 56 |  | -3      | -15.42 to 9.420  | No  | ns   |
| Day 42 vs. Day 56 |  | 5.218   | -8.060 to 18.50  | No  | ns   |
| HD 60:            |  |         |                  |     |      |
| Day 0 vs. Day 7   |  | -7      | -17.42 to 3.424  | No  | ns   |
| Day 0 vs. Day 14  |  | -5      | -15.42 to 5.424  | No  | ns   |
| Day 0 vs. Day 28  |  | 2.667   | -7.084 to 12.42  | No  | ns   |

|                   |          |                   |     |     |
|-------------------|----------|-------------------|-----|-----|
| Day 0 vs. Day 42  | -14.29   | -24.72 to -3.870  | Yes | **  |
| Day 0 vs. Day 56  | -0.3333  | -10.76 to 10.09   | No  | ns  |
| Day 7 vs. Day 14  | 2        | -8.424 to 12.42   | No  | ns  |
| Day 7 vs. Day 28  | 9.667    | -0.08373 to 19.42 | No  | ns  |
| Day 7 vs. Day 42  | -7.293   | -17.72 to 3.130   | No  | ns  |
| Day 7 vs. Day 56  | 6.667    | -3.757 to 17.09   | No  | ns  |
| Day 14 vs. Day 28 | 7.667    | -2.084 to 17.42   | No  | ns  |
| Day 14 vs. Day 42 | -9.293   | -19.72 to 1.130   | No  | ns  |
| Day 14 vs. Day 56 | 4.667    | -5.757 to 15.09   | No  | ns  |
| Day 28 vs. Day 42 | -16.96   | -26.71 to -7.210  | Yes | *** |
| Day 28 vs. Day 56 | -3       | -12.75 to 6.750   | No  | ns  |
| Day 42 vs. Day 56 | 13.96    | 3.536 to 24.38    | Yes | **  |
| HD 71:            |          |                   |     |     |
| Day 0 vs. Day 7   | -1.667   | -35.11 to 31.78   | No  | ns  |
| Day 0 vs. Day 14  | -17.67   | -51.11 to 15.78   | No  | ns  |
| Day 0 vs. Day 28  | -29.87   | -59.78 to 0.04768 | No  | ns  |
| Day 0 vs. Day 42  | -17.75   | -51.19 to 15.70   | No  | ns  |
| Day 0 vs. Day 56  | -11.13   | -44.58 to 22.32   | No  | ns  |
| Day 7 vs. Day 14  | -16      | -49.45 to 17.45   | No  | ns  |
| Day 7 vs. Day 28  | -28.2    | -58.11 to 1.714   | No  | ns  |
| Day 7 vs. Day 42  | -16.08   | -49.53 to 17.36   | No  | ns  |
| Day 7 vs. Day 56  | -9.463   | -42.91 to 23.98   | No  | ns  |
| Day 14 vs. Day 28 | -12.2    | -42.11 to 17.71   | No  | ns  |
| Day 14 vs. Day 42 | -0.08148 | -33.53 to 33.36   | No  | ns  |
| Day 14 vs. Day 56 | 6.537    | -26.91 to 39.98   | No  | ns  |
| Day 28 vs. Day 42 | 12.12    | -17.80 to 42.03   | No  | ns  |
| Day 28 vs. Day 56 | 18.74    | -11.18 to 48.65   | No  | ns  |
| Day 42 vs. Day 56 | 6.618    | -26.83 to 40.06   | No  | ns  |
| HD 77:            |          |                   |     |     |
| Day 0 vs. Day 7   | -7       | -23.56 to 9.564   | No  | ns  |
| Day 0 vs. Day 14  | -11      | -27.56 to 5.564   | No  | ns  |
| Day 0 vs. Day 28  | -15      | -30.49 to 0.4944  | No  | ns  |
| Day 0 vs. Day 42  | -14.94   | -31.50 to 1.629   | No  | ns  |
| Day 0 vs. Day 56  | -12.67   | -29.23 to 3.898   | No  | ns  |
| Day 7 vs. Day 14  | -4       | -20.56 to 12.56   | No  | ns  |
| Day 7 vs. Day 28  | -8       | -23.49 to 7.494   | No  | ns  |
| Day 7 vs. Day 42  | -7.935   | -24.50 to 8.629   | No  | ns  |
| Day 7 vs. Day 56  | -5.667   | -22.23 to 10.90   | No  | ns  |
| Day 14 vs. Day 28 | -4       | -19.49 to 11.49   | No  | ns  |
| Day 14 vs. Day 42 | -3.935   | -20.50 to 12.63   | No  | ns  |
| Day 14 vs. Day 56 | -1.667   | -18.23 to 14.90   | No  | ns  |

|                      |                 |                  |     |     |
|----------------------|-----------------|------------------|-----|-----|
| Day 28 vs. Day 42    | 0.06498         | -15.43 to 15.56  | No  | ns  |
| Day 28 vs. Day 56    | 2.333           | -13.16 to 17.83  | No  | ns  |
| Day 42 vs. Day 56    | 2.268           | -14.30 to 18.83  | No  | ns  |
| <b>HD 109:</b>       |                 |                  |     |     |
| Day 0 vs. Day 7      | -3              | -18.63 to 12.63  | No  | ns  |
| Day 0 vs. Day 14     | -14             | -29.63 to 1.630  | No  | ns  |
| Day 0 vs. Day 28     | -23.42          | -38.04 to -8.796 | Yes | *** |
| Day 0 vs. Day 42     | -12.41          | -28.04 to 3.218  | No  | ns  |
| Day 0 vs. Day 56     | -7.765          | -22.39 to 6.856  | No  | ns  |
| Day 7 vs. Day 14     | -11             | -26.63 to 4.630  | No  | ns  |
| Day 7 vs. Day 28     | -20.42          | -35.04 to -5.796 | Yes | **  |
| Day 7 vs. Day 42     | -9.412          | -25.04 to 6.218  | No  | ns  |
| Day 7 vs. Day 56     | -4.765          | -19.39 to 9.856  | No  | ns  |
| Day 14 vs. Day 28    | -9.417          | -24.04 to 5.204  | No  | ns  |
| Day 14 vs. Day 42    | 1.588           | -14.04 to 17.22  | No  | ns  |
| Day 14 vs. Day 56    | 6.235           | -8.385 to 20.86  | No  | ns  |
| Day 28 vs. Day 42    | 11              | -3.616 to 25.63  | No  | ns  |
| Day 28 vs. Day 56    | 15.65           | 2.116 to 29.19   | Yes | *   |
| Day 42 vs. Day 56    | 4.647           | -9.973 to 19.27  | No  | ns  |
| <b>HD 180:</b>       |                 |                  |     |     |
| Day 0 vs. Day 7      | -4.667          | -17.91 to 8.581  | No  | ns  |
| Day 0 vs. Day 14     | -9              | -22.25 to 4.247  | No  | ns  |
| Day 0 vs. Day 28     | -6.917          | -19.31 to 5.475  | No  | ns  |
| Day 0 vs. Day 42     | -14.7           | -27.95 to -1.453 | Yes | *   |
| Day 0 vs. Day 56     | -1.657          | -14.90 to 11.59  | No  | ns  |
| Day 7 vs. Day 14     | -4.333          | -17.58 to 8.914  | No  | ns  |
| Day 7 vs. Day 28     | -2.25           | -14.64 to 10.14  | No  | ns  |
| Day 7 vs. Day 42     | -10.03          | -23.28 to 3.213  | No  | ns  |
| Day 7 vs. Day 56     | 3.01            | -10.24 to 16.26  | No  | ns  |
| Day 14 vs. Day 28    | 2.083           | -10.31 to 14.48  | No  | ns  |
| Day 14 vs. Day 42    | -5.701          | -18.95 to 7.547  | No  | ns  |
| Day 14 vs. Day 56    | 7.343           | -5.904 to 20.59  | No  | ns  |
| Day 28 vs. Day 42    | -7.784          | -20.18 to 4.608  | No  | ns  |
| Day 28 vs. Day 56    | 5.26            | -7.132 to 17.65  | No  | ns  |
| Day 42 vs. Day 56    | 13.04           | -0.2034 to 26.29 | No  | ns  |
| <b>NG2</b>           |                 |                  |     |     |
| <b>Two-way ANOVA</b> |                 |                  |     |     |
| Source of Variation  | P value summary | Significant?     |     |     |
| Interaction          | ns              | No               |     |     |
| Column Factor        | ***             | Yes              |     |     |

| Row Factor                                                    | ns         | No              |              |         |
|---------------------------------------------------------------|------------|-----------------|--------------|---------|
| <b>One-way ANOVA (between time points, within cell lines)</b> |            |                 |              |         |
| Bonferroni's multiple comparisons test                        | Mean Diff. | 95% CI of diff. | Significant? | Summary |
| <b>CTR 18:</b>                                                |            |                 |              |         |
| Day 0 vs. Day 7                                               | 2.667      | -6.442 to 11.77 | No           | ns      |
| Day 0 vs. Day 14                                              | -4.667     | -13.77 to 4.442 | No           | ns      |
| Day 0 vs. Day 28                                              | 1.167      | -7.353 to 9.687 | No           | ns      |
| Day 0 vs. Day 42                                              | 2.667      | -6.442 to 11.77 | No           | ns      |
| Day 0 vs. Day 56                                              | 1.167      | -6.721 to 9.055 | No           | ns      |
| Day 7 vs. Day 14                                              | -7.333     | -16.44 to 1.775 | No           | ns      |
| Day 7 vs. Day 28                                              | -1.5       | -10.02 to 7.020 | No           | ns      |
| Day 7 vs. Day 42                                              | 0          | -9.108 to 9.108 | No           | ns      |
| Day 7 vs. Day 56                                              | -1.5       | -9.388 to 6.388 | No           | ns      |
| Day 14 vs. Day 28                                             | 5.833      | -2.687 to 14.35 | No           | ns      |
| Day 14 vs. Day 42                                             | 7.333      | -1.775 to 16.44 | No           | ns      |
| Day 14 vs. Day 56                                             | 5.833      | -2.055 to 13.72 | No           | ns      |
| Day 28 vs. Day 42                                             | 1.5        | -7.020 to 10.02 | No           | ns      |
| Day 28 vs. Day 56                                             | 0          | -7.201 to 7.201 | No           | ns      |
| Day 42 vs. Day 56                                             | -1.5       | -9.388 to 6.388 | No           | ns      |
| <b>CTR 21:</b>                                                |            |                 |              |         |
| Day 0 vs. Day 7                                               | 1.667      | -6.970 to 10.30 | No           | ns      |
| Day 0 vs. Day 14                                              | -0.3333    | -8.970 to 8.303 | No           | ns      |
| Day 0 vs. Day 28                                              | 0.6667     | -7.412 to 8.745 | No           | ns      |
| Day 0 vs. Day 42                                              | 1.566      | -7.070 to 10.20 | No           | ns      |
| Day 0 vs. Day 56                                              | 2.667      | -5.970 to 11.30 | No           | ns      |
| Day 7 vs. Day 14                                              | -2         | -10.64 to 6.636 | No           | ns      |
| Day 7 vs. Day 28                                              | -1         | -9.079 to 7.079 | No           | ns      |
| Day 7 vs. Day 42                                              | -0.1004    | -8.737 to 8.536 | No           | ns      |
| Day 7 vs. Day 56                                              | 1          | -7.636 to 9.636 | No           | ns      |
| Day 14 vs. Day 28                                             | 1          | -7.079 to 9.079 | No           | ns      |
| Day 14 vs. Day 42                                             | 1.9        | -6.737 to 10.54 | No           | ns      |
| Day 14 vs. Day 56                                             | 3          | -5.636 to 11.64 | No           | ns      |
| Day 28 vs. Day 42                                             | 0.8996     | -7.179 to 8.978 | No           | ns      |
| Day 28 vs. Day 56                                             | 2          | -6.079 to 10.08 | No           | ns      |
| Day 42 vs. Day 56                                             | 1.1        | -7.536 to 9.737 | No           | ns      |
| <b>CTR 28:</b>                                                |            |                 |              |         |
| Day 0 vs. Day 7                                               | 5          | -17.28 to 27.28 | No           | ns      |
| Day 0 vs. Day 14                                              | 9.667      | -12.61 to 31.94 | No           | ns      |
| Day 0 vs. Day 28                                              | 1.5        | -19.34 to 22.34 | No           | ns      |

|                   |        |                 |     |    |
|-------------------|--------|-----------------|-----|----|
| Day 0 vs. Day 42  | 2.657  | -19.62 to 24.93 | No  | ns |
| Day 0 vs. Day 56  | 11     | -11.28 to 33.28 | No  | ns |
| Day 7 vs. Day 14  | 4.667  | -17.61 to 26.94 | No  | ns |
| Day 7 vs. Day 28  | -3.5   | -24.34 to 17.34 | No  | ns |
| Day 7 vs. Day 42  | -2.343 | -24.62 to 19.93 | No  | ns |
| Day 7 vs. Day 56  | 6      | -16.28 to 28.28 | No  | ns |
| Day 14 vs. Day 28 | -8.167 | -29.00 to 12.67 | No  | ns |
| Day 14 vs. Day 42 | -7.01  | -29.29 to 15.27 | No  | ns |
| Day 14 vs. Day 56 | 1.333  | -20.94 to 23.61 | No  | ns |
| Day 28 vs. Day 42 | 1.157  | -19.68 to 21.99 | No  | ns |
| Day 28 vs. Day 56 | 9.5    | -11.34 to 30.34 | No  | ns |
| Day 42 vs. Day 56 | 8.343  | -13.93 to 30.62 | No  | ns |
| CTR 33:           |        |                 |     |    |
| Day 0 vs. Day 7   | 11.67  | -1.746 to 25.08 | No  | ns |
| Day 0 vs. Day 14  | 11.67  | -1.746 to 25.08 | No  | ns |
| Day 0 vs. Day 28  | 7      | -6.413 to 20.41 | No  | ns |
| Day 0 vs. Day 42  | 4.823  | -8.589 to 18.24 | No  | ns |
| Day 0 vs. Day 56  | 14.49  | 2.872 to 26.10  | Yes | ** |
| Day 7 vs. Day 14  | 0      | -13.41 to 13.41 | No  | ns |
| Day 7 vs. Day 28  | -4.667 | -18.08 to 8.746 | No  | ns |
| Day 7 vs. Day 42  | -6.843 | -20.26 to 6.569 | No  | ns |
| Day 7 vs. Day 56  | 2.821  | -8.794 to 14.44 | No  | ns |
| Day 14 vs. Day 28 | -4.667 | -18.08 to 8.746 | No  | ns |
| Day 14 vs. Day 42 | -6.843 | -20.26 to 6.569 | No  | ns |
| Day 14 vs. Day 56 | 2.821  | -8.794 to 14.44 | No  | ns |
| Day 28 vs. Day 42 | -2.177 | -15.59 to 11.24 | No  | ns |
| Day 28 vs. Day 56 | 7.488  | -4.128 to 19.10 | No  | ns |
| Day 42 vs. Day 56 | 9.665  | -1.951 to 21.28 | No  | ns |
| HD 60:            |        |                 |     |    |
| Day 0 vs. Day 7   | 7.333  | -6.629 to 21.30 | No  | ns |
| Day 0 vs. Day 14  | 4.667  | -9.296 to 18.63 | No  | ns |
| Day 0 vs. Day 28  | -1.667 | -14.73 to 11.39 | No  | ns |
| Day 0 vs. Day 42  | 5.847  | -8.116 to 19.81 | No  | ns |
| Day 0 vs. Day 56  | 8.333  | -4.155 to 20.82 | No  | ns |
| Day 7 vs. Day 14  | -2.667 | -16.63 to 11.30 | No  | ns |
| Day 7 vs. Day 28  | -9     | -22.06 to 4.061 | No  | ns |
| Day 7 vs. Day 42  | -1.486 | -15.45 to 12.48 | No  | ns |
| Day 7 vs. Day 56  | 1      | -11.49 to 13.49 | No  | ns |
| Day 14 vs. Day 28 | -6.333 | -19.39 to 6.728 | No  | ns |
| Day 14 vs. Day 42 | 1.181  | -12.78 to 15.14 | No  | ns |
| Day 14 vs. Day 56 | 3.667  | -8.822 to 16.16 | No  | ns |

|                   |          |                 |     |    |
|-------------------|----------|-----------------|-----|----|
| Day 28 vs. Day 42 | 7.514    | -5.547 to 20.58 | No  | ns |
| Day 28 vs. Day 56 | 10       | -1.472 to 21.47 | No  | ns |
| Day 42 vs. Day 56 | 2.486    | -10.00 to 14.97 | No  | ns |
| HD 71:            |          |                 |     |    |
| Day 0 vs. Day 7   | 5.667    | -2.932 to 14.26 | No  | ns |
| Day 0 vs. Day 14  | 3.667    | -4.932 to 12.26 | No  | ns |
| Day 0 vs. Day 28  | -0.9167  | -8.960 to 7.126 | No  | ns |
| Day 0 vs. Day 42  | 5.759    | -2.840 to 14.36 | No  | ns |
| Day 0 vs. Day 56  | 6.167    | -1.280 to 13.61 | No  | ns |
| Day 7 vs. Day 14  | -2       | -10.60 to 6.598 | No  | ns |
| Day 7 vs. Day 28  | -6.583   | -14.63 to 1.460 | No  | ns |
| Day 7 vs. Day 42  | 0.09195  | -8.506 to 8.690 | No  | ns |
| Day 7 vs. Day 56  | 0.5      | -6.946 to 7.946 | No  | ns |
| Day 14 vs. Day 28 | -4.583   | -12.63 to 3.460 | No  | ns |
| Day 14 vs. Day 42 | 2.092    | -6.506 to 10.69 | No  | ns |
| Day 14 vs. Day 56 | 2.5      | -4.946 to 9.946 | No  | ns |
| Day 28 vs. Day 42 | 6.675    | -1.368 to 14.72 | No  | ns |
| Day 28 vs. Day 56 | 7.083    | 0.2858 to 13.88 | Yes | *  |
| Day 42 vs. Day 56 | 0.408    | -7.038 to 7.854 | No  | ns |
| HD 77:            |          |                 |     |    |
| Day 0 vs. Day 7   | 0        | -9.593 to 9.593 | No  | ns |
| Day 0 vs. Day 14  | -3.333   | -12.93 to 6.260 | No  | ns |
| Day 0 vs. Day 28  | -4.5     | -13.47 to 4.474 | No  | ns |
| Day 0 vs. Day 42  | -0.8937  | -10.49 to 8.699 | No  | ns |
| Day 0 vs. Day 56  | -0.09747 | -8.405 to 8.210 | No  | ns |
| Day 7 vs. Day 14  | -3.333   | -12.93 to 6.260 | No  | ns |
| Day 7 vs. Day 28  | -4.5     | -13.47 to 4.474 | No  | ns |
| Day 7 vs. Day 42  | -0.8937  | -10.49 to 8.699 | No  | ns |
| Day 7 vs. Day 56  | -0.09747 | -8.405 to 8.210 | No  | ns |
| Day 14 vs. Day 28 | -1.167   | -10.14 to 7.807 | No  | ns |
| Day 14 vs. Day 42 | 2.44     | -7.153 to 12.03 | No  | ns |
| Day 14 vs. Day 56 | 3.236    | -5.072 to 11.54 | No  | ns |
| Day 28 vs. Day 42 | 3.606    | -5.367 to 12.58 | No  | ns |
| Day 28 vs. Day 56 | 4.403    | -3.181 to 11.99 | No  | ns |
| Day 42 vs. Day 56 | 0.7962   | -7.512 to 9.104 | No  | ns |
| HD 109:           |          |                 |     |    |
| Day 0 vs. Day 7   | 6.333    | -12.27 to 24.94 | No  | ns |
| Day 0 vs. Day 14  | -3.667   | -22.27 to 14.94 | No  | ns |
| Day 0 vs. Day 28  | -1.667   | -18.31 to 14.97 | No  | ns |
| Day 0 vs. Day 42  | 4.356    | -14.25 to 22.96 | No  | ns |

|                   |         |                 |    |    |
|-------------------|---------|-----------------|----|----|
| Day 0 vs. Day 56  | 6.046   | -10.07 to 22.16 | No | ns |
| Day 7 vs. Day 14  | -10     | -28.60 to 8.605 | No | ns |
| Day 7 vs. Day 28  | -8      | -24.64 to 8.641 | No | ns |
| Day 7 vs. Day 42  | -1.977  | -20.58 to 16.63 | No | ns |
| Day 7 vs. Day 56  | -0.2874 | -16.40 to 15.82 | No | ns |
| Day 14 vs. Day 28 | 2       | -14.64 to 18.64 | No | ns |
| Day 14 vs. Day 42 | 8.023   | -10.58 to 26.63 | No | ns |
| Day 14 vs. Day 56 | 9.713   | -6.400 to 25.82 | No | ns |
| Day 28 vs. Day 42 | 6.023   | -10.62 to 22.66 | No | ns |
| Day 28 vs. Day 56 | 7.713   | -6.085 to 21.51 | No | ns |
| Day 42 vs. Day 56 | 1.69    | -14.42 to 17.80 | No | ns |
| <b>HD 180:</b>    |         |                 |    |    |
| Day 0 vs. Day 7   | 1       | -47.12 to 49.12 | No | ns |
| Day 0 vs. Day 14  | -21.67  | -69.78 to 26.45 | No | ns |
| Day 0 vs. Day 28  | -7.833  | -49.50 to 33.84 | No | ns |
| Day 0 vs. Day 42  | -4.345  | -52.46 to 43.77 | No | ns |
| Day 0 vs. Day 56  | 0.1063  | -48.01 to 48.22 | No | ns |
| Day 7 vs. Day 14  | -22.67  | -70.78 to 25.45 | No | ns |
| Day 7 vs. Day 28  | -8.833  | -50.50 to 32.84 | No | ns |
| Day 7 vs. Day 42  | -5.345  | -53.46 to 42.77 | No | ns |
| Day 7 vs. Day 56  | -0.8937 | -49.01 to 47.22 | No | ns |
| Day 14 vs. Day 28 | 13.83   | -27.84 to 55.50 | No | ns |
| Day 14 vs. Day 42 | 17.32   | -30.80 to 65.44 | No | ns |
| Day 14 vs. Day 56 | 21.77   | -26.34 to 69.89 | No | ns |
| Day 28 vs. Day 42 | 3.488   | -38.18 to 45.16 | No | ns |
| Day 28 vs. Day 56 | 7.94    | -33.73 to 49.61 | No | ns |
| Day 42 vs. Day 56 | 4.451   | -43.67 to 52.57 | No | ns |

**S100B**

|                                                               |                 |                 |              |         |
|---------------------------------------------------------------|-----------------|-----------------|--------------|---------|
| <b>Two-way ANOVA</b>                                          |                 |                 |              |         |
| Source of Variation                                           | P value summary | Significant?    |              |         |
| Interaction                                                   | ns              | No              |              |         |
| Column Factor                                                 | **              | Yes             |              |         |
| Row Factor                                                    | ns              | No              |              |         |
| <b>One-way ANOVA (between time points, within cell lines)</b> |                 |                 |              |         |
| Bonferroni's multiple comparisons test                        | Mean Diff.      | 95% CI of diff. | Significant? | Summary |
| <b>CTR 18:</b>                                                |                 |                 |              |         |
| Day 0 vs. Day 7                                               | 1.667           | -11.14 to 14.47 | No           | ns      |
| Day 0 vs. Day 14                                              | 5               | -7.808 to 17.81 | No           | ns      |
| Day 0 vs. Day 28                                              | 5.5             | -6.481 to 17.48 | No           | ns      |



|                   |         |                 |    |    |
|-------------------|---------|-----------------|----|----|
| Day 7 vs. Day 14  | 3.333   | -9.474 to 16.14 | No | ns |
| Day 7 vs. Day 28  | 3.833   | -8.147 to 15.81 | No | ns |
| Day 14 vs. Day 28 | 0.5     | -11.48 to 12.48 | No | ns |
| <b>CTR 21:</b>    |         |                 |    |    |
| Day 0 vs. Day 7   | -5.333  | -25.14 to 14.48 | No | ns |
| Day 0 vs. Day 14  | 7       | -12.81 to 26.81 | No | ns |
| Day 0 vs. Day 28  | 5.417   | -13.11 to 23.95 | No | ns |
| Day 7 vs. Day 14  | 12.33   | -7.476 to 32.14 | No | ns |
| Day 7 vs. Day 28  | 10.75   | -7.780 to 29.28 | No | ns |
| Day 14 vs. Day 28 | -1.583  | -20.11 to 16.95 | No | ns |
| <b>CTR 28:</b>    |         |                 |    |    |
| Day 0 vs. Day 7   | -8      | -34.35 to 18.35 | No | ns |
| Day 0 vs. Day 14  | 1.667   | -24.69 to 28.02 | No | ns |
| Day 0 vs. Day 28  | -4.833  | -29.48 to 19.82 | No | ns |
| Day 7 vs. Day 14  | 9.667   | -16.69 to 36.02 | No | ns |
| Day 7 vs. Day 28  | 3.167   | -21.48 to 27.82 | No | ns |
| Day 14 vs. Day 28 | -6.5    | -31.15 to 18.15 | No | ns |
| <b>CTR 33:</b>    |         |                 |    |    |
| Day 0 vs. Day 7   | -8      | -22.25 to 6.246 | No | ns |
| Day 0 vs. Day 14  | -2.667  | -16.91 to 11.58 | No | ns |
| Day 0 vs. Day 28  | -8.917  | -22.24 to 4.409 | No | ns |
| Day 7 vs. Day 14  | 5.333   | -8.913 to 19.58 | No | ns |
| Day 7 vs. Day 28  | -0.9167 | -14.24 to 12.41 | No | ns |
| Day 14 vs. Day 28 | -6.25   | -19.58 to 7.076 | No | ns |
| <b>HD 60:</b>     |         |                 |    |    |
| Day 0 vs. Day 7   | 1       | -11.78 to 13.78 | No | ns |
| Day 0 vs. Day 14  | 0       | -12.78 to 12.78 | No | ns |
| Day 0 vs. Day 28  | 2.917   | -9.036 to 14.87 | No | ns |
| Day 7 vs. Day 14  | -1      | -13.78 to 11.78 | No | ns |
| Day 7 vs. Day 28  | 1.917   | -10.04 to 13.87 | No | ns |
| Day 14 vs. Day 28 | 2.917   | -9.036 to 14.87 | No | ns |
| <b>HD 71:</b>     |         |                 |    |    |
| Day 0 vs. Day 7   | 6.667   | -28.69 to 42.03 | No | ns |
| Day 0 vs. Day 14  | 12.67   | -22.69 to 48.03 | No | ns |
| Day 0 vs. Day 28  | 5.917   | -27.16 to 38.99 | No | ns |
| Day 7 vs. Day 14  | 6       | -29.36 to 41.36 | No | ns |
| Day 7 vs. Day 28  | -0.75   | -33.83 to 32.33 | No | ns |
| Day 14 vs. Day 28 | -6.75   | -39.83 to 26.33 | No | ns |

|                                                              |                 |                   |                        |         |
|--------------------------------------------------------------|-----------------|-------------------|------------------------|---------|
| <b>HD 77:</b>                                                |                 |                   |                        |         |
| Day 0 vs. Day 7                                              | -19             | -35.64 to -2.361  | Yes                    | *       |
| Day 0 vs. Day 14                                             | -6              | -23.79 to 11.79   | No                     | ns      |
| Day 0 vs. Day 28                                             | -4              | -20.64 to 12.64   | No                     | ns      |
| Day 7 vs. Day 14                                             | 13              | -3.639 to 29.64   | No                     | ns      |
| Day 7 vs. Day 28                                             | 15              | -0.4046 to 30.40  | No                     | ns      |
| Day 14 vs. Day 28                                            | 2               | -14.64 to 18.64   | No                     | ns      |
| <b>HD 109:</b>                                               |                 |                   |                        |         |
| Day 0 vs. Day 7                                              | -4.667          | -12.51 to 3.174   | No                     | ns      |
| Day 0 vs. Day 14                                             | 0.3333          | -7.508 to 8.174   | No                     | ns      |
| Day 0 vs. Day 28                                             | 0               | -7.334 to 7.334   | No                     | ns      |
| Day 7 vs. Day 14                                             | 5               | -2.841 to 12.84   | No                     | ns      |
| Day 7 vs. Day 28                                             | 4.667           | -2.668 to 12.00   | No                     | ns      |
| Day 14 vs. Day 28                                            | -0.3333         | -7.668 to 7.001   | No                     | ns      |
| <b>HD 180:</b>                                               |                 |                   |                        |         |
| Day 0 vs. Day 7                                              | -9.333          | -31.39 to 12.72   | No                     | ns      |
| Day 0 vs. Day 14                                             | -2.333          | -24.39 to 19.72   | No                     | ns      |
| Day 0 vs. Day 28                                             | -5.25           | -25.88 to 15.38   | No                     | ns      |
| Day 7 vs. Day 14                                             | 7               | -15.05 to 29.05   | No                     | ns      |
| Day 7 vs. Day 28                                             | 4.083           | -16.55 to 24.71   | No                     | ns      |
| Day 14 vs. Day 28                                            | -2.917          | -23.55 to 17.71   | No                     | ns      |
| <b>DCX</b>                                                   |                 |                   |                        |         |
| <b>Two-way ANOVA</b>                                         |                 |                   |                        |         |
| Source of Variation                                          | P value summary | Significant?      |                        |         |
| Interaction                                                  | ****            | Yes               |                        |         |
| Column Factor                                                | ****            | Yes               |                        |         |
| Row Factor                                                   | ***             | Yes               |                        |         |
| <b>One-way ANOVA (between cell lines, within time point)</b> |                 |                   |                        |         |
| Bonferroni's Multiple Comparison Test                        | Mean Diff.      | t                 | Significant? P < 0.05? | Summary |
| <b>Day 42:</b>                                               |                 |                   |                        |         |
| CTR 18 vs. CTR 21                                            | -0.5697         | -5.067 to 3.928   | No                     | ns      |
| CTR 18 vs. CTR 28                                            | -0.9918         | -5.489 to 3.505   | No                     | ns      |
| CTR 18 vs. CTR 33                                            | -1.844          | -6.341 to 2.653   | No                     | ns      |
| CTR 18 vs. HD 60                                             | -4.718          | -9.215 to -0.2209 | Yes                    | *       |
| CTR 18 vs. HD 71                                             | -3.447          | -7.944 to 1.050   | No                     | ns      |
| CTR 18 vs. HD 77                                             | 0.1258          | -4.371 to 4.623   | No                     | ns      |
| CTR 18 vs. HD 109                                            | -2.191          | -6.688 to 2.306   | No                     | ns      |

|                   |  |         |                   |     |    |
|-------------------|--|---------|-------------------|-----|----|
| CTR 18 vs. HD 180 |  | -5.855  | -10.35 to -1.357  | Yes | ** |
| CTR 21 vs. CTR 28 |  | -0.4221 | -4.919 to 4.075   | No  | ns |
| CTR 21 vs. CTR 33 |  | -1.274  | -5.771 to 3.223   | No  | ns |
| CTR 21 vs. HD 60  |  | -4.149  | -8.646 to 0.3488  | No  | ns |
| CTR 21 vs. HD 71  |  | -2.877  | -7.375 to 1.620   | No  | ns |
| CTR 21 vs. HD 77  |  | 0.6955  | -3.802 to 5.193   | No  | ns |
| CTR 21 vs. HD 109 |  | -1.621  | -6.119 to 2.876   | No  | ns |
| CTR 21 vs. HD 180 |  | -5.285  | -9.782 to -0.7876 | Yes | *  |
| CTR 28 vs. CTR 33 |  | -0.8521 | -5.349 to 3.645   | No  | ns |
| CTR 28 vs. HD 60  |  | -3.726  | -8.224 to 0.7709  | No  | ns |
| CTR 28 vs. HD 71  |  | -2.455  | -6.953 to 2.042   | No  | ns |
| CTR 28 vs. HD 77  |  | 1.118   | -3.380 to 5.615   | No  | ns |
| CTR 28 vs. HD 109 |  | -1.199  | -5.697 to 3.298   | No  | ns |
| CTR 28 vs. HD 180 |  | -4.863  | -9.360 to -0.3655 | Yes | *  |
| CTR 33 vs. HD 60  |  | -2.874  | -7.372 to 1.623   | No  | ns |
| CTR 33 vs. HD 71  |  | -1.603  | -6.100 to 2.894   | No  | ns |
| CTR 33 vs. HD 77  |  | 1.97    | -2.528 to 6.467   | No  | ns |
| CTR 33 vs. HD 109 |  | -0.3473 | -4.845 to 4.150   | No  | ns |
| CTR 33 vs. HD 180 |  | -4.011  | -8.508 to 0.4866  | No  | ns |
| HD 60 vs. HD 71   |  | 1.271   | -3.226 to 5.768   | No  | ns |
| HD 60 vs. HD 77   |  | 4.844   | 0.3467 to 9.341   | Yes | *  |
| HD 60 vs. HD 109  |  | 2.527   | -1.970 to 7.024   | No  | ns |
| HD 60 vs. HD 180  |  | -1.136  | -5.634 to 3.361   | No  | ns |
| HD 71 vs. HD 77   |  | 3.573   | -0.9244 to 8.070  | No  | ns |
| HD 71 vs. HD 109  |  | 1.256   | -3.241 to 5.753   | No  | ns |
| HD 71 vs. HD 180  |  | -2.408  | -6.905 to 2.090   | No  | ns |
| HD 77 vs. HD 109  |  | -2.317  | -6.814 to 2.180   | No  | ns |
| HD 77 vs. HD 180  |  | -5.98   | -10.48 to -1.483  | Yes | ** |
| HD 109 vs. HD 180 |  | -3.663  | -8.161 to 0.8339  | No  | ns |
| Day 56:           |  |         |                   |     |    |
| CTR 18 vs. CTR 21 |  | 3.639   | 0.05499 to 7.223  | Yes | *  |
| CTR 18 vs. CTR 28 |  | 0.9028  | -2.681 to 4.487   | No  | ns |
| CTR 18 vs. CTR 33 |  | 2.711   | -0.8735 to 6.295  | No  | ns |
| CTR 18 vs. HD 60  |  | 2.68    | -0.9040 to 6.264  | No  | ns |
| CTR 18 vs. HD 71  |  | 2.803   | -0.7807 to 6.387  | No  | ns |
| CTR 18 vs. HD 77  |  | 2.398   | -1.186 to 5.982   | No  | ns |
| CTR 18 vs. HD 109 |  | -1.826  | -5.410 to 1.758   | No  | ns |
| CTR 18 vs. HD 180 |  | 1.747   | -1.837 to 5.331   | No  | ns |
| CTR 21 vs. CTR 28 |  | -2.736  | -6.320 to 0.8479  | No  | ns |
| CTR 21 vs. CTR 33 |  | -0.9285 | -4.513 to 2.656   | No  | ns |
| CTR 21 vs. HD 60  |  | -0.9589 | -4.543 to 2.625   | No  | ns |
| CTR 21 vs. HD 71  |  | -0.8357 | -4.420 to 2.748   | No  | ns |

|                                                               |  |            |                   |     |     |
|---------------------------------------------------------------|--|------------|-------------------|-----|-----|
| CTR 21 vs. HD 77                                              |  | -1.241     | -4.825 to 2.343   | No  | ns  |
| CTR 21 vs. HD 109                                             |  | -5.465     | -9.049 to -1.881  | Yes | *** |
| CTR 21 vs. HD 180                                             |  | -1.892     | -5.476 to 1.692   | No  | ns  |
| CTR 28 vs. CTR 33                                             |  | 1.808      | -1.776 to 5.392   | No  | ns  |
| CTR 28 vs. HD 60                                              |  | 1.777      | -1.807 to 5.361   | No  | ns  |
| CTR 28 vs. HD 71                                              |  | 1.901      | -1.684 to 5.485   | No  | ns  |
| CTR 28 vs. HD 77                                              |  | 1.495      | -2.089 to 5.079   | No  | ns  |
| CTR 28 vs. HD 109                                             |  | -2.729     | -6.313 to 0.8550  | No  | ns  |
| CTR 28 vs. HD 180                                             |  | 0.8438     | -2.740 to 4.428   | No  | ns  |
| CTR 33 vs. HD 60                                              |  | -0.03044   | -3.615 to 3.554   | No  | ns  |
| CTR 33 vs. HD 71                                              |  | 0.09285    | -3.491 to 3.677   | No  | ns  |
| CTR 33 vs. HD 77                                              |  | -0.3127    | -3.897 to 3.271   | No  | ns  |
| CTR 33 vs. HD 109                                             |  | -4.537     | -8.121 to -0.9526 | Yes | **  |
| CTR 33 vs. HD 180                                             |  | -0.9639    | -4.548 to 2.620   | No  | ns  |
| HD 60 vs. HD 71                                               |  | 0.1233     | -3.461 to 3.707   | No  | ns  |
| HD 60 vs. HD 77                                               |  | -0.2822    | -3.866 to 3.302   | No  | ns  |
| HD 60 vs. HD 109                                              |  | -4.506     | -8.090 to -0.9222 | Yes | **  |
| HD 60 vs. HD 180                                              |  | -0.9334    | -4.517 to 2.651   | No  | ns  |
| HD 71 vs. HD 77                                               |  | -0.4055    | -3.990 to 3.179   | No  | ns  |
| HD 71 vs. HD 109                                              |  | -4.63      | -8.214 to -1.045  | Yes | **  |
| HD 71 vs. HD 180                                              |  | -1.057     | -4.641 to 2.527   | No  | ns  |
| HD 77 vs. HD 109                                              |  | -4.224     | -7.808 to -0.6400 | Yes | *   |
| HD 77 vs. HD 180                                              |  | -0.6512    | -4.235 to 2.933   | No  | ns  |
| HD 109 vs. HD 180                                             |  | 3.573      | -0.01122 to 7.157 | No  | ns  |
| <b>Paired T-test (between time points, within cell lines)</b> |  |            |                   |     |     |
| CTR 18:                                                       |  |            |                   |     |     |
| Paired t test                                                 |  |            |                   |     |     |
| P value                                                       |  | 0.1927     |                   |     |     |
| P value summary                                               |  | ns         |                   |     |     |
| Significantly different? (P < 0.05)                           |  | No         |                   |     |     |
| One- or two-tailed P value?                                   |  | Two-tailed |                   |     |     |
| CTR 21:                                                       |  |            |                   |     |     |
| Paired t test                                                 |  |            |                   |     |     |
| P value                                                       |  | 0.1266     |                   |     |     |
| P value summary                                               |  | ns         |                   |     |     |
| Significantly different? (P < 0.05)                           |  | No         |                   |     |     |
| One- or two-tailed P value?                                   |  | Two-tailed |                   |     |     |
| CTR 28:                                                       |  |            |                   |     |     |
| Paired t test                                                 |  |            |                   |     |     |
| P value                                                       |  | 0.849      |                   |     |     |

|                                     |            |  |  |  |
|-------------------------------------|------------|--|--|--|
| P value summary                     | ns         |  |  |  |
| Significantly different? (P < 0.05) | No         |  |  |  |
| One- or two-tailed P value?         | Two-tailed |  |  |  |
| CTR 33:                             |            |  |  |  |
| Paired t test                       |            |  |  |  |
| P value                             | 0.0593     |  |  |  |
| P value summary                     | ns         |  |  |  |
| Significantly different? (P < 0.05) | No         |  |  |  |
| One- or two-tailed P value?         | Two-tailed |  |  |  |
| HD 60:                              |            |  |  |  |
| Paired t test                       |            |  |  |  |
| P value                             | 0.1149     |  |  |  |
| P value summary                     | ns         |  |  |  |
| Significantly different? (P < 0.05) | No         |  |  |  |
| One- or two-tailed P value?         | Two-tailed |  |  |  |
| HD 71:                              |            |  |  |  |
| Paired t test                       |            |  |  |  |
| P value                             | 0.0323     |  |  |  |
| P value summary                     | *          |  |  |  |
| Significantly different? (P < 0.05) | Yes        |  |  |  |
| One- or two-tailed P value?         | Two-tailed |  |  |  |
| HD 77:                              |            |  |  |  |
| Paired t test                       |            |  |  |  |
| P value                             | 0.4991     |  |  |  |
| P value summary                     | ns         |  |  |  |
| Significantly different? (P < 0.05) | No         |  |  |  |
| One- or two-tailed P value?         | Two-tailed |  |  |  |
| HD 109:                             |            |  |  |  |
| Paired t test                       |            |  |  |  |
| P value                             | 0.3646     |  |  |  |
| P value summary                     | ns         |  |  |  |
| Significantly different? (P < 0.05) | No         |  |  |  |
| One- or two-tailed P value?         | Two-tailed |  |  |  |
| HD 180:                             |            |  |  |  |
| Paired t test                       |            |  |  |  |
| P value                             | 0.0019     |  |  |  |
| P value summary                     | **         |  |  |  |
| Significantly different? (P < 0.05) | Yes        |  |  |  |
| One- or two-tailed P value?         | Two-tailed |  |  |  |
